1 **Somatic genome editing with the RCAS/TVA-CRISPR/Cas9 system for precision tumor**  
2 **modeling**

3  
4 Barbara Oldrini\*<sup>1</sup>, Álvaro Curiel-García\*<sup>1</sup>, Carolina Marques<sup>1</sup>, Veronica Matia<sup>1</sup>, Özge Uluçkan<sup>2</sup>,  
5 Raul Torres-Ruiz<sup>3</sup>, Sandra Rodriguez-Perales<sup>3</sup>, Jason T. Huse<sup>4</sup> and Massimo Squatrito<sup>1#</sup>  
6

7 <sup>1</sup>Seve Ballesteros Foundation Brain Tumor Group, Cancer Cell Biology Program, Spanish  
8 National Cancer Research Center, CNIO, 28029 Madrid, Spain. <sup>2</sup>Genes, Development, and  
9 Disease Group, Cancer Cell Biology Program, Spanish National Cancer Research Centre, CNIO,  
10 28029 Madrid, Spain. <sup>3</sup>Molecular Cytogenetics Group, Human Cancer Genetics Program,  
11 Spanish National Cancer Research Center, CNIO, 28029 Madrid, Spain. <sup>4</sup>Departments of  
12 Pathology and Translational Molecular Pathology, University of Texas MD Anderson Cancer  
13 Center, Houston, TX 77030, USA.

14 \* Equal contribution

15 # Correspondence: [msquatrito@cnio.es](mailto:msquatrito@cnio.es)  
16

17 **Abstract**

18 It has been gradually established that the vast majority of human tumors are extraordinarily  
19 heterogeneous at a genetic level. To accurately recapitulate this complexity, it is now evident that  
20 *in vivo* animal models of cancers will require to recreate not just a handful of simple genetic  
21 alterations, but possibly dozens and increasingly intricate. Here, we have combined the  
22 RCAS/TVA system with the CRISPR/Cas9 genome editing tools for precise modeling of human  
23 tumors. We show that somatic deletion in neural stem cells (NSCs) of a variety of known tumor  
24 suppressor genes (*Trp53*, *Cdkn2a* and *Pten*), in combination with the expression of an oncogene  
25 driver, leads to high-grade glioma formation. Moreover, by simultaneous delivery of pairs of  
26 guide RNAs (gRNAs) we generated different gene fusions, either by chromosomal deletion  
27 (*Bcan-Ntrk1*) or by chromosomal translocation (*Myb-Qk*), and we show that they have  
28 transforming potential *in vitro* and *in vivo*. Lastly, using homology-directed-repair (HDR), we  
29 also produced tumors carrying the Braf V600E mutation, frequently identified in a variety of  
30 subtypes of gliomas. In summary, we have developed an extremely powerful and versatile mouse  
31 model for *in vivo* somatic genome editing, that will elicit the generation of more accurate cancer  
32 models particularly appropriate for pre-clinical testing.  
33  
34

35 **Introduction**

36 A decade of studies has underlined the complexity of the genetic events that characterize  
37 the genomic landscapes of common forms of human cancer <sup>1</sup>. While a few cancer genes are  
38 mutated at high frequencies (>20%), the greatest number of cancer genes in most patients appear  
39 at intermediate frequencies (2–20%) or lower <sup>2</sup>. Strikingly, the functional significance of the vast  
40 majority of these alterations still remains elusive. A current high priority in cancer research is to  
41 functionally validate candidate genetic alterations to distinguish those that are significant for  
42 cancer progression and treatment response. In order to do so, it is essential to develop flexible  
43 genetically engineered mouse models that can speed up the functional identification of cancer  
44 driver genes among the large number of passenger alterations <sup>3</sup>.

45 The growing level of sophistication of the genome engineering technologies has made it  
46 possible to target almost any candidate gene in the *in vivo* setting. The CRISPR (Clustered  
47 Regularly Interspaced Short Palindromic repeats) – Cas (CRISPR-associated), the most powerful  
48 genome editing system so far, has revolutionized research in many fields, including cancer  
49 animal modelling, by allowing precise manipulation of the genome of individual cells. Its  
50 applications span from the inactivation of tumor suppressor genes, to the generation of somatic  
51 point mutations and more complex genomic rearrangements such as gene fusion events.

52 A possibly significant limitation of CRISPR-based *in vivo* somatic genome editing is the  
53 requirement to concurrently deliver the RNA guides and the Cas9 enzyme to the specific tissue  
54 of interest. To deal with this issue, various groups recently generated transgenic mice expressing  
55 Cas9 in a Cre- or tetracycline- dependent manner <sup>4–6</sup>. The combination of somatic genome  
56 editing with the vast collection of currently available genetically engineered mouse models will  
57 provide the chance to introduce defined genetic lesions into specific cell types, leading to the  
58 development of more accurate tumor models.

59 The RCAS/TVA based approach uses replication-competent avian leukosis virus (ALV)  
60 splice-acceptor (RCAS) vectors to target gene expression to specific cell types in transgenic  
61 mice. In these mice, cell type-specific gene promoter drive expression of TVA, the cell surface  
62 receptor for the virus. The RCAS/TVA system has been successfully used in different mouse  
63 models to deliver genes or shRNAs of interest into a plethora of cell types: neural stem cells,  
64 astrocytes, hepatocytes and pancreatic acinar cells, among many others <sup>7</sup>.

65 Here we describe a series of new mouse models that combine the genome editing  
66 capability of the CRISPR/Cas9 system with the somatic gene delivery of the RCAS/TVA  
67 approach to generate precision tumor modeling. To prove the efficacy of such a powerful system,  
68 we produced a number of *in vivo* and *ex vivo* models of glioma with tailored genetic alterations.

69 The gliomas are a large group of brain tumors and within gliomas the glioblastoma  
70 (GBM) is the most frequent form of the disease and overall the most common and lethal primary  
71 central nervous system (CNS) tumor in adults. A series of large-scale genomic analysis has  
72 underlined the complexity of the genetic events that characterize the glioma genome. However,  
73 so far, we have been able to study only a minority of these genetic alterations due to the lack of  
74 appropriate tumor models.

75 We took advantage of the previously developed *Rosa26-LSL-Cas9* (*LSL-Cas9*) knockin  
76 mouse strain <sup>4</sup> and combined it with the *Nestin-tv-a* (*Ntv-a*) and the *GFAP-tv-a* (*Gtv-a*)  
77 transgenic mice that express the TVA receptor under the control of the rat *nestin* and human  
78 *GFAP* promoter, respectively <sup>8,9</sup>. Moreover, we have further crossed those strains with either the  
79 *Nestin-Cre* (*Nes-Cre*) or *hGFAP-Cre* transgenic lines <sup>10,11</sup>, to allow for Cas9 expression in neural  
80 stem/progenitor cells and in astrocytes, or with a mouse strain carrying a tamoxifen-activated  
81 recombinase, *hUBC-CreERT2* <sup>12</sup>, for ubiquitous and inducible Cas9 expression.

82 Through *in vivo* delivery of RCAS plasmids that carry guided RNAs (gRNAs) for a series  
83 of tumor suppressor genes known to be frequently deleted in GBM (*Trp53*, *Cdkn2a* and *Pten*), in  
84 combination with the expression of the Platelet Derived Growth Factor Subunit B (PDGFB), we  
85 show that we can efficiently generate high-grade gliomas in mice that express both Cas9 and  
86 TVA in the Nestin or GFAP positive cells. Moreover, by simultaneous *ex vivo* transduction into  
87 neural stem cells (NSCs) of RCAS plasmids expressing pairs of gRNAs we generated either  
88 chromosomal deletion (*Bcan-Ntrk1* gene fusion) or chromosomal translocation (*Myb-Qk* gene  
89 fusion) and we show that they lead to glioma formation when transplanted in  
90 immunocompromised mice. We further generated *Braf* mutant gliomas by inducing a homology-  
91 directed repair-mediated BRAF V600E mutation.

92 Lastly, by *ex vivo* treatment of some of these tumor models we demonstrate their utility  
93 for pre-clinical testing of targeted therapies.

94 In conclusion, combining the RCAS/TVA and CRISPR/Cas9 models we have developed  
95 an extremely powerful mouse model for *in vivo* somatic genome editing, that allows targeting  
96 specific cell types with definite genetic alterations to generate precision tumor models.

97

## 98 **Results**

### 99 **Generation of CNS Cas9-expressing mouse strains**

100 To test the possibility of somatic genome editing by combining the RCAS/TVA and  
101 CRISPR/Cas9 models, we generated a series of mouse strains that allowed the TVA and Cas9  
102 expression in specific cell types in the brain.

103 Nestin is an intermediate filament protein (IFP) that is predominantly expressed in the  
104 central nervous system stem/ progenitor cells during embryonic development, but also in  
105 muscles and other tissues. In adult organism, its expression in the brain is mainly restricted to the  
106 neural stem cell compartment of the subventricular zone (SVZ). After differentiation, nestin is  
107 downregulated and replaced by tissue-specific IFPs. The glial fibrillary acidic protein (GFAP) is  
108 an IFP that is expressed by numerous cell types of the CNS including astrocytes and ependymal  
109 cells. *Nestin-tv-a* (*Ntv-a*) and *GFAP-tv-a* (*Gtv-a*) transgenic mice that express the TVA receptor  
110 under the control of the rat *nestin* and human *GFAP* promoter, have been widely used for  
111 modeling brain tumorigenesis<sup>8,9,13</sup>.

112 The Rosa26-LSL-Cas9 knockin mice (*LSL-Cas9*) have a floxed-STOP cassette  
113 precluding expression of the downstream bicistronic sequences (Cas9-P2A-EGFP) and it was  
114 generated to overcome the delivery challenges of the Cas9 enzyme to specific tissues of interest  
115<sup>4</sup>. We crossed these mice with the *Ntv-a* and *Gtv-a* transgenic mice to obtain the *Ntv-a; LSL-*  
116 *Cas9* and *Gtv-a; LSL-Cas9*. Although RCAS-Cre expressing plasmids have been previously used  
117 in combination with different TVA expressing mice to allow tissue specific deletion of a variety  
118 of floxed alleles<sup>13-15</sup>, to ensure a robust recombination in the CNS of the floxed-STOP cassette  
119 in the *Ntv-a; LSL-Cas9* and *Gtv-a; LSL-Cas9* we further crossed these mice with either the  
120 *Nestin-Cre* (*Nes-Cre*) or *hGFAP-Cre* transgenic lines<sup>10,11</sup>. The resulting *Ntv-a; Nes-Cre; LSL-*  
121 *Cas9* and *Gtv-a; hGFAP-Cre; LSL-Cas9* mice presented no abnormalities in development and  
122 size (Supplementary Fig. 1a), were fertile and had normal litter sizes.

123 The Nestin-Cre is expressed quite early during development, beginning at E9.5, while the  
124 hGFAP-Cre appears to be expressed around E12.5-E13.5<sup>10,11</sup>. Both strains lead to widespread

125 expression of the Cas9-P2A-EGFP throughout the brain of adult mice and pups (Fig. 1a-b and  
126 Supplementary Fig. 1b). Also of note it is the co-localization of NESTIN and GFAP with EGFP  
127 in the area of the sub-ventricular zone (Fig. 1a-b), one of the known site of neurogenesis of adult  
128 mice, indicating robust Cas9 expression in the NSC compartment.

129

### 130 **Efficient gene knockouts with RCAS-gRNA plasmids drive high-grade glioma formation**

131 To explore whether the newly engineered RCAS/*tv-a*/Cas9 strains were suitable for *in*  
132 *vivo* genome editing, we first generated a series of RCAS plasmids that would allow the  
133 expression of gRNAs. For this purpose, we sub-cloned into the RCAS vector a cassette carrying  
134 a human U6 promoter (hU6), followed by a PGK promoter that drove the expression of a  
135 puromycin resistance gene (Puro) linked to a blue fluorescent protein (BFP) via a self-cleavable  
136 T2A peptide (hU6-gRNA-PGK-Puro-T2A-BFP) (Fig. 2a). We then cloned different previously  
137 described gRNAs targeting tumor suppressor genes (TSGs) frequently altered in high-grade  
138 gliomas: *Trp53*, *Cdkn2a* and *Pten*. All the RCAS plasmids generated for our studies were  
139 constructed using intermediate vectors compatible with the Gateway cloning system and the  
140 previously described RCAS-destination vector<sup>16</sup> (see Methods for details). To test the knockout  
141 efficiency of the RCAS-gRNA plasmids, we derived NSCs from *Ntv-a*; *LSL-Cas9* and infected  
142 them with a Cre-expressing plasmid to induce Cas9 expression. In parallel we also generated, by  
143 retroviral infection, NIH3T3 mouse fibroblasts expressing both TVA and the Cas9 genes. We  
144 then infected both cell lines with multiple rounds of infections using the various RCAS-gRNA  
145 plasmids. After either drug-selection (for the NSCs TVA-Cas9) or fluorescent activated cell  
146 sorting (FACS) (for the BFP in the NIH-3T3 TVA-Cas9) we verified the deletion of *Trp53*,  
147 *Cdkn2a* and *Pten* by western blot analysis. Since NIH-3T3 cells are *Cdkn2a* null, we tested the  
148 *Cdkn2a* gRNAs only in the NSCs. As shown in figure 2b, we observed efficient deletion of all  
149 those genes in both cellular systems.

150 We then tested the ability of the *Trp53*, *Cdkn2a* and *Pten* gRNAs to cooperate with  
151 PDGFB to induce high-grade gliomas (GBM) when injected into the *Ntv-a*; *Nes-Cre*; *LSL-Cas9*  
152 and *Gtv-a*; *hGFAP-Cre*; *LSL-Cas9* mice. RCAS-PDGFB intracranial injection into *Ntv-a* and  
153 *Gtv-a* pups has been previously shown to be sufficient to induce gliomas with variable  
154 penetrance (from 40% to 75%), but only a small fraction of the injected mice (25%) presented  
155 high-grade tumor features, such as pseudopalisades necrosis and microvascular proliferation<sup>17-</sup>

156 <sup>19</sup>. Moreover, RCAS-PDGFB injection into *Ntv-a* and *Gtv-a* adult mice resulted in very low  
157 tumor penetrance (approximately 15-20%) and long latency (over 100 days) <sup>13</sup>. Co-injections  
158 RCAS-PDGFB and RCAS-TSG-gRNA (either one of *Trp53*, *Cdkn2a* or *Pten* gRNAs) into *Ntv-*  
159 *a*; *Nes-Cre*; *LSL-Cas9* and *Gtv-a*; *hGFAP-Cre*; *LSL-Cas9* pups resulted in a shortened tumor  
160 latency and increased total tumor incidence as compared to the co-injections of RCAS-PDGFB  
161 and RCAS-gRNA non-targeting control (Ctrl) (Fig. 2c and Supplementary Fig. 2). Most  
162 importantly, the vast majority (80-100%) of the RCAS-PDGFB/RCAS-TSG-gRNA injected  
163 mice showed histological features of high-grade gliomas (Fig. 2c-d). We also generated RCAS  
164 plasmids expressing the gRNA and the PDGFB in the same constructs (hU6-gRNA-PGK-Puro-  
165 T2A-PDGFB) (Fig. 2a). When injected into *Ntv-a*; *Nes-Cre*; *LSL-Cas9* pups, the RCAS-Cdkn2a-  
166 gRNA-PDGFB bicistronic vector was able to induce high-grade tumor formation with full  
167 penetrance and very short latency (approximately 40 days) (Fig. 2c and Supplementary Fig. 2).

168 Analogously to what was previously reported for the RCAS-PDGFB, injection in adult  
169 mice showed a considerably reduced tumor incidence. Actually, in our 120 days' experimental  
170 timeframe, we didn't observe any tumors in the mice co-injected with the RCAS-PDGFB and  
171 RCAS-gRNA non-targeting control neither in the *Ntv-a*; *Nes-Cre*; *LSL-Cas9* nor in the *Gtv-a*;  
172 *hGFAP-Cre*; *LSL-Cas9*. However, similarly to the injections in the pups, the injection of RCAS-  
173 PDGFB/RCAS-TSG-gRNA in adult mice lead to increased tumor incidence, with the majority of  
174 the tumor presenting high-grade characteristics (Fig. 2c and Supplementary Fig. 2).

175 Immunohistochemical (IHC) analysis of paraffin-embedded tissue showed loss of *Trp53*,  
176 *Cdkn2a* and *Pten* expression in the tumors injected with the corresponding RCAS-TSG-gRNA  
177 plasmid (Fig. 2d).

178 In summary, these data demonstrate that RCAS-gRNA constructs can induce deletion of  
179 the gene of interest in an *in vivo* setting and they could be used to efficiently target virtually any  
180 tumor suppressor gene.

181

## 182 **Inducible Cas9 expression in adult mice does not activate a robust immune response**

183 The injection of the RCAS-TSG-gRNA plasmids into *Ntv-a*; *Nes-Cre*; *LSL-Cas9* and  
184 *Gtv-a*; *hGFAP-Cre*; *LSL-Cas9* mice should lead to an early deletion of the tumor suppressor  
185 gene of interest, due to the Cas9 expression at the time of the injection. Therefore, in order to  
186 have a mouse model in which we could generate the deletion of a specific gene in a time-

187 controlled manner, to investigate for example the role of a gene not only in tumor initiation but  
188 also in tumor progression, we crossed the *Ntv-a; LSL-Cas9* mice with the *hUBC-CreERT2*, for  
189 inducible Cas9 expression upon tamoxifen exposure<sup>12</sup>.

190 There have been controversial reports of immune response to Cas9 in some experimental  
191 models. On one hand, sign of both humoral and cellular immunity against Cas9 following  
192 systemic Adenoviral (Ad) vector-mediated Cas9 delivery was detected in mice<sup>20</sup>. Moreover,  
193 injection of adeno-associated viruses (AAV) expressing Cas9 in the adult tibialis anterior  
194 muscle produced the elevation of CD45<sup>+</sup> hematopoietic cells in the injected muscle and  
195 enlargement of the draining lymph nodes<sup>21</sup>. On the other hand, Cas9 ribonucleoparticles (RNP)  
196 injection into the brain of adult mice showed an undetectable to mild microglia-mediated innate  
197 immune response<sup>22</sup>.

198 As previously discussed above, Nestin-Cre and hGFAP-Cre are expressed quite early  
199 during embryogenesis, thus Cas9 expression under the control of those promoters is not expected  
200 to induce any immune response. However, we could not exclude such response upon tamoxifen-  
201 induced Cas9 expression in adult *Ntv-a; LSL-Cas9; hUBC-CreERT2* mice. Therefore, we  
202 performed an in-depth analysis of a possible immune response in the *Ntv-a; LSL-Cas9; hUBC-  
203 CreERT2* upon Cas9 induction. For this purpose, 4 weeks old *Ntv-a; LSL-Cas9; hUBC-  
204 CreERT2<sup>+/+</sup>* and *Ntv-a; LSL-Cas9; hUBC-CreERT2<sup>+T</sup>* mice were treated with tamoxifen-  
205 containing diet for a total of 5 weeks. Whole blood samples were taken every two weeks. At the  
206 end of the experiment (week 9), blood, spleen and brain tissue were harvested and analyzed by  
207 flow cytometry, real-time quantitative PCR (qPCR) and immunofluorescence (Supplementary  
208 Fig. 3a). After 5 weeks of tamoxifen treatment we observed high percentage of EGFP positive  
209 cells in the blood (around 50%) and lower number in spleen and brain (approximately 10-15%)  
210 (Fig. 3a-b Supplementary Fig. 3c). Mice did not show any signs of inflammation and  
211 splenomegaly was not observed. Circulating levels of T-cells, B-cells, granulocytes and  
212 monocytes were determined by flow cytometry in the blood and spleen. While there were no  
213 significant differences neither in T cells (CD3<sup>+</sup>CD4<sup>+</sup>) nor B cells (CD3<sup>-</sup>B220<sup>+</sup>), there was a trend  
214 towards decreased circulating Gr-1 positive neutrophils in the blood of the *Ntv-a; LSL-Cas9;  
215 hUBC-CreERT2<sup>+T</sup>* tamoxifen-treated mice, which could signify inefficient production of these  
216 cells in the bone marrow (Fig. 3a). Despite this reduction, we did not detect significant  
217 differences in neither the number nor the percentage of granulocytes in whole blood cell counts

218 (Supplementary Fig. 3b). Flow cytometry in the brain showed no changes in lymphocytes,  
219 microglia or macrophages with the gating strategy described previously<sup>23</sup> using CD45 and  
220 CD11b. We further confirmed by qPCR that there were no major differences in mRNA  
221 expression of a panel of microglia activation specific markers (*CD45*, *IL12a-1*, *P2ry12*,  
222 *Tmem119*, *Cx3cr1* and *Iba-1*) (Supplementary Fig. 3d).

223 Since our analysis did not suggest an immune response to Cas9 expression in the *Ntv-a*;  
224 *LSL-Cas9*; *hUBC-CreERT2<sup>+T</sup>* mice, we proceeded to inject them with the RCAS-  
225 PDGFB/RCAS-gRNA. Four weeks old adult mice were injected intracranially with the RCAS-  
226 PDGFB in combination with either RCAS-p53-gRNA or RCAS-Ctrl-gRNA. Two weeks after  
227 injection, the mice were separated in two groups and treated for two weeks with either mock-  
228 treatment or tamoxifen (see Methods for details). Mice were then sacrificed either upon sign of  
229 tumor development or at the end of the experiment (90 days). As for the *Ntv-a*; *Nes-Cre*; *LSL-*  
230 *Cas9* and *Gtv-a*; *hGFAP-Cre*; *LSL-Cas9* strains, none of the *Ntv-a*; *LSL-Cas9*; *hUBC-*  
231 *CreERT2<sup>+T</sup>* mice injected with the RCAS-PDGFB and RCAS-Ctrl-gRNA developed tumors  
232 (Fig. 3c). While only one out of 3 of the mock-treated *Ntv-a*; *LSL-Cas9*; *hUBC-CreERT2<sup>+T</sup>* mice  
233 injected with the RCAS-PDGFB and RCAS-p53-gRNA developed a low-grade tumor at 84 days,  
234 all the mice treated with tamoxifen were sacrificed at earlier time due to high-grade gliomas (Fig.  
235 3c-d).

236

### 237 **The *Bcan-Ntrk1* gene fusion produce high-grade gliomas**

238 Gene fusions have been documented as cancer-drivers for more than three decades,  
239 providing valuable insights into the tumorigenesis process. The occurrence and importance of  
240 gene fusions in glioma has been appreciated only recently, largely due to high-throughput  
241 technologies, and gene fusions have been indicated as one of the major genomic abnormalities in  
242 GBM<sup>24</sup>. The functional role of the vast majority of these alterations is completely unexplored.  
243 Recurrent gene fusions involving the Trk receptor family (*NTRK1*, 2 and 3 genes) have been  
244 recently described in a variety of tumors, including gliomas<sup>25-27</sup>. Here, we decided to focus on  
245 the *BCAN-NTRK1* gene fusion, identified in glioblastoma and glioneuronal tumors<sup>28,29</sup>.

246 *BCAN* and *NTRK1* are located on chromosome (Chr) 1 q23.1 and the *BCAN-NTRK1*  
247 fusion gene results from of an intra-chromosomal deletion that juxtapose the *BCAN* exon 13 with  
248 the *NTRK1* exon 11 (Supplementary Fig. 4a). The *BCAN* gene codes for Brevican, a glycoprotein



249 that is highly expressed in the brain, while *NTRK1*, that codes for the TrkA kinase, is almost  
250 undetectable in the adult brain (Supplementary Fig. 4b). The mouse homologues, *Bcan* and  
251 *Ntrk1*, located on Chr3, have a similar gene structure and expression pattern to their human  
252 counterparts (Supplementary Fig. 4a-b). Hence, we argued that the *Bcan-Ntrk1* fusion would be  
253 an appropriate genomic alteration to be studied with the RCAS/tv-a/Cas9 system.

254 In order to generate the *Bcan-Ntrk1* gene fusion we designed gRNAs in the introns 13  
255 and 10 of *Bcan* and *Ntrk1*, respectively (Fig. 4a). The pair of gRNAs was subsequently cloned  
256 into an RCAS plasmid containing both a hU6 and mU6 promoters (hU6-gRNA-mU6-gRNA-  
257 PGK-Puro-T2A-BFP) (RCAS-gRNA-pair) (Fig. 4b, *top panel*), with a previously described  
258 strategy<sup>30</sup>. The RCAS-gRNA-pair vector was then used to infect the NIH-3T3 TVA-Cas9 (data  
259 not shown) and also *p53-null* TVA-Cas9 NSCs isolated from *Gtv-a; hGFAP-Cre; LSL-Cas9;*  
260 *p53<sup>lox/lox</sup>* pups. Generation of the expected chromosomal deletion was tested by PCR on genomic  
261 DNA, and later analyzed by sequencing (Fig. 4b, *bottom panel*). Furthermore, we used  
262 fluorescence *in situ* hybridization (FISH) to evaluate the frequency of cells carrying the desired  
263 deletion on Chr3. Approximately 40% of the cells (80/209) showed the loss of one copy of the  
264 probe located between the *Ntrk1* and *Bcan* gene, indicating that the generation of the *Bcan-Ntrk1*  
265 rearrangement is a relatively efficient process (Fig 4c).

266 We then confirmed the expression of the *Bcan-Ntrk1* fusion transcript, in the *p53-null*  
267 TVA-Cas9 NSCs, by reverse transcription PCR and sequencing of a cDNA fragment  
268 overlapping the fusion exon junction (Fig. 4d). Analogously to what has been observed in the  
269 GBM patients carrying the *BCAN-NTRK1* fusion (Supplementary Fig. 4c), the generation of the  
270 *Bcan-Ntrk1* rearrangement leads to exceptionally high levels of the *Ntrk1* 3' mRNA region  
271 involved in the gene fusion (Fig. 4d, *bottom right panel*).

272 To test whether the *Bcan-Ntrk1* gene fusion was sufficient to drive glioma formation we  
273 injected intracranially into *NOD/SCID* mice the *p53-null* TVA-Cas9 NSCs infected with the  
274 RCAS-gRNA-pair. While none (0/5) of the mice injected with the control NSCs developed  
275 tumors during the observation period (90 days), 4 out of the 6 mice injected with the *Bcan-*  
276 *Ntrk1*gRNA pairs had to be sacrificed due to sign of tumor formation (with mean survival of 72  
277  $\pm$  14 days). Histopathological examination of the tumors evidenced a series of characteristics  
278 typical of high-grade gliomas: nuclear atypia, high number of mitotic figures, necrotic areas and  
279 infiltration in the normal brain parenchyma (Fig. 4e and Supplementary Fig. 4d-e). *Bcan-Ntrk1-*

280 induced tumors showed elevated percentage of Ki67 positive cells, were positive for OLIG2 and  
281 NESTIN, negative for the neuronal marker NeuN and, besides the small percentage of astrocytes  
282 trapped inside the tumor, GFAP positive cells were almost exclusively detected at the  
283 normal/tumor border (Fig. 4d). Moreover, IHC staining evidenced high level of expression of  
284 *Ntrk1* as compared to a PDGFB-induced tumor (Supplementary Fig. 4f).

285 We further confirmed by genomic PCR and FISH analysis the presence of the *Bcan-*  
286 *Ntrk1* gene fusion on cells isolated from the tumor-bearing mice, propagated *in vitro* as  
287 tumorspheres (Supplementary Fig. 4g-h). Strikingly, these tumorspheres expressed very high  
288 levels of *Ntrk1* as compared to both the NSCs control or to the *Bcan-Ntrk1* NSCs prior  
289 intracranial injection (Supplementary Fig. 4i). These data would suggest that *in vivo*, from the  
290 mixed population of the NSCs infected with the *Bcan-Ntrk1* gRNAs, those cells that carried the  
291 gene rearrangement were positively selected.

292 There has been a lot of interest lately in targeting *NTRK* gene fusions across multiple  
293 tumor types<sup>31</sup>. Entrectinib is a first-in-class pan-TRK kinase inhibitor currently undergoing  
294 clinical trials in a variety of cancers. To confirm that the *Bcan-Ntrk1* tumors we generated were  
295 dependent on TrkA activity, we treated *in vitro* with Entrectinib the *Bcan-Ntrk1* tumorspheres.  
296 As shown in figure 4f, the *Bcan-Ntrk1* tumorspheres were exquisitely sensitive to Trk inhibition,  
297 while no effect was observed on the control *p53-null* TVA-Cas9 NSCs. Entrectinib led to a  
298 significant reduction of tumor cells growth associated with an increase of the number of  
299 apoptotic cells, detected as sub-G1 population in a propidium iodide staining (Fig. 4f-g).

300 Overall these data indicate that the RCAS/TVA-CRISPR/Cas9 system is a very powerful  
301 model to study the role of gene fusions in tumorigenesis and as possible therapeutic targets.

302

### 303 **Generation of the *Myb-Qk* chromosomal translocation**

304 The human *BCAN-NTRK1* and mouse *Bcan-Ntrk1* fusions are generated by a small  
305 chromosomal deletion of approximately 200Kb. To test whether the RCAS/tv-a/Cas9 system was  
306 also suited for inter-chromosomal translocations, we decided to model the *MYB-QKI* gene  
307 fusion, a recently identified putative driver of a subtype of pediatric low-grade gliomas (PLGG),  
308 known as angiocentric gliomas<sup>32</sup>. Although *MYB* and *QKI* are both located on Chr6 in human,  
309 the mouse homologues *Myb* and *Qk* are located on different chromosomes, Chr10 and Chr17,  
310 respectively.

311 *MYB* encodes for a transcription factor that is a key regulator of hematopoietic cell  
312 proliferation and deregulated *MYB* activity has been observed in variety of human cancers. *QKI*  
313 is a tumor suppressor gene that encodes for a RNA-binding protein, QUAKING, that plays a role  
314 in the development of the CNS, among other organs. Several *MYB-QKI* gene fusions have been  
315 described in angiocentric gliomas, all of them involved the same *QKI* 3' region (exon 5 to 8)  
316 fused to different *MYB* exons (1-9, 1-11 or 1-15). Here, we focused on the most frequent *MYB*  
317 (exon1-9) - *QKI* (exon 5 to 8) fusion event.

318 To generate the mouse *Myb* (exon1-9) - *Qk* (exon 5 to 8) fusion, we designed gRNAs in  
319 the intron 4 for *Myb* and 9 for *Qk* (Fig. 5a), and we cloned them into the RCAS-gRNA-pair.  
320 Genomic PCR and sequencing from the NIH-3T3 TVA-Cas9 (data not shown) and also from  
321 *p53-null* TVA-Cas9 NSCs infected with the RCAS-Qk-gRNA-Myb-gRNA, confirmed the  
322 generation of the *Myb-Qk* fusion (Fig. 5b). By RT-PCR we also observed the expression of the  
323 *Myb-Qk* transcript (Fig. 5c).

324 In human and mouse normal adult brain, *Myb* mRNA expression is almost undetectable  
325 (Supplementary Fig. 5b). The *MYB-QKI* fusion has been shown to functionally activate the *MYB*  
326 promoter and to possibly contribute to an autoregulatory feedback loop<sup>32</sup>. Indeed, when we  
327 measured *Myb* expression in cells expressing the *Myb-Qk* fusion we observed an increase of *Myb*  
328 mRNA as compared to control cells (Fig. 5d). We also observed increased mRNA levels of a  
329 series of genes (*ErbB2*, *Cdk6* and *Slc9a31*) that have been shown to be upregulated by the *MYB-*  
330 *QKI* fusion<sup>32</sup> (Fig. 5d).

331 We then tested their transforming potential *in vitro* by plating the cells in soft-agar, and  
332 we observed that the *p53-null* NSCs expressing the *Myb-Qk* fusion, but not the *p53-null* NSCs  
333 infected with the Ctrl gRNA cells, were able to form colonies.

334

### 335 **Modeling BRAF V600E mutation by homology directed repair (HDR)**

336 One of the known applications of the CRISPR/Cas9 system is to induce point mutations  
337 through Homologous Recombination (HR). Delivery of a gRNA with either double-stranded  
338 DNA (dsDNA) or single-stranded DNA (ssDNA) repair templates, containing a desired modified  
339 sequence together with variable length upstream and downstream homology arms, has been used  
340 to recreate oncogenic driver mutations<sup>4</sup>.

341 Activating mutations in the *BRAF* kinase gene (V600E) have been identified in various  
342 types of pediatric gliomas (Pilocytic astrocytomas (<10%), pleomorphic xanthoastrocytomas  
343 (WHO grades II and III; 50%–65% cases), gangliogliomas (20%–75% cases)) and also adult  
344 high-grade gliomas (5%)<sup>33</sup>.

345 To model a missense gain-of-function *Braf* mutation we used the strategy previously  
346 described to generate a *Kras*<sup>G12D</sup> mutation<sup>4</sup> and designed an HDR donor template, which  
347 comprises of an 800bp genomic sequence covering exon 18 of the mouse *Braf* gene. This HDR  
348 donor encoded: (i) a valin (V) to glutamine (E) mutation in the amino acid position 637 (V637E),  
349 resulting in the oncogenic *Braf*<sup>V637E</sup> mutation, homologous to the human *BRAF*<sup>V600E</sup>; (ii) 11  
350 synonymous single-nucleotide changes to discriminate the difference between the donor and  
351 wild-type sequences and to mutate the protospacer-adjacent motif (PAM) to avoid donor DNA  
352 cleavage by Cas9. The HDR donor template, together with a gRNA targeting a sequence 22bp  
353 upstream the *Braf* V637 residue, were subsequently cloned into a lentiviral vector (Fig. 6a) and  
354 transduced into the *p53-null* TVA-Cas9 NSCs. We then evaluated the efficiency of HDR-  
355 mediated *Braf* mutation by PCR, sub-cloning of the amplified cDNA region and Sanger  
356 sequencing. Sixty percent (6/10) of the analyzed clones contained the desired V637E mutation  
357 and also a second point mutation D624N (Supplementary Fig. 6a). This latter mutation, although  
358 undesired, is a conservative mutation from an aspartate to an asparagine residue and it's not  
359 expected to have any functional consequence on BRAF activity.

360 When transplanted intracranially into *NOD/SCID* mice, the *p53-null Braf*<sup>V637E</sup> NSCs  
361 induce tumor formation in 100% of the injected mice (6/6), with an average survival of 66 ± 11.5  
362 days. Histopathological examination of the tumors evidenced a number of features characteristic  
363 of high-grade gliomas: nuclear atypia, high number of mitotic figures and necrotic areas (Fig. 6b  
364 and Supplementary Fig. 6b). Moreover, we observed clusters of tumor cells infiltrating the  
365 normal brain parenchyma, with the vast majority of these cells surrounding tumor vessels  
366 (Supplementary Fig. 6b), resembling the vascular co-option observed both in primary and  
367 metastatic brain tumors. It is also to note the presence of some giant cells (Supplementary Fig.  
368 6c) and areas of the tumors with epithelioid morphology (Supplementary Fig. 6d).

369 Immunohistochemical analysis of the BRAF mutant tumors revealed high percentage of  
370 Ki67 positive cells, positivity for both OLIG2 and NESTIN and elevated MAPK kinase activity,  
371 as evidenced by pERK IHC (Fig. 6b). Additionally, we were able to confirm the expression of

372 the BRAF V637E mutation using an antibody specifically designed to recognize the human  
373 BRAF V600E mutant.

374 To validate that the BRAF mutant tumors were dependent on an active BRAF signaling  
375 pathway, we isolated tumorspheres from two of those tumors and we treated them *in vitro* with  
376 Dabrafenib, a specific BRAF inhibitor that is currently in clinical trials for *BRAF*<sup>V600E</sup> mutant  
377 melanomas. Both tumorspheres lines carried the *Braf*<sup>V637E</sup> mutation as confirmed by PCR and  
378 Sanger sequencing (Supplementary Fig. 6e). As shown in figure 6d, Dabrafenib treatment  
379 induced growth reduction in both *Braf*<sup>V637E</sup> tumors, but not in *p53-null* NSCs. Moreover, western  
380 blot analysis showed a reduction of MAPK kinase signaling pathway after exposure to  
381 Dabrafenib in *Braf*<sup>V637E</sup> tumor cells but not in control cells (Fig. 6e).

382 In summary, we have presented a platform that will be useful to study not only the role of  
383 tumor suppressor genes and genomic rearrangements but also of potential oncogenic mutations.

384

## 385 Discussion

386 Here we have established a novel powerful methodology for precision tumor modeling *in*  
387 *vivo* and *ex vivo*, by combining the versatility of the genome editing CRISPR/Cas9 technology  
388 with the specificity of somatic gene transfer mediated by the RCAS/TVA system.

389 The latest improvements in the genetically engineered mouse modeling (GEMM) have  
390 contributed to the understanding of the molecular pathways responsible for tumor initiation and  
391 progression. Few elements should be taken in consideration to properly mimic the natural history  
392 of a tumor: a) introduction of the same mutations found in human tumors, ideally in their  
393 endogenous loci; b) the genetic alterations should be silent during embryonic and early postnatal  
394 development (with the exception of models of familiar or pediatric tumors); c) the mutant genes  
395 should be expressed in particular target tissues or in specific cell types and e) the mutations  
396 should be present in a limited number of cells. The RCAS/TVA-CRISPR/Cas9 system described  
397 here gives the possibility to recapitulate all of these characteristics in one single model.

398 A number of different knockin TVA mouse models have been published in the past and  
399 they have been used to study a variety of cancers: gliomas, medulloblastomas, melanoma, breast,  
400 pancreatic, ovarian and liver cancer<sup>7,34</sup>. Breeding of any of the TVA lines to the knockin Cas9  
401 strain would allow to generate novel somatic genome editing models to study a plethora of tumor  
402 types. Moreover, Seidler and colleagues have recently described a Cre-dependent TVA-

403 transgenic line (*LSL-R26-TVA-lacZ*)<sup>35</sup> that in combination with the Cas9 knockin mice and one of  
404 the hundreds cell-type-specific Cre mouse strains<sup>36,37</sup> would allow the use of the RCAS/TVA-  
405 CRISPR/Cas9 system for somatic genome editing virtually in any proliferative cells of the  
406 organism.

407 As a proof-of-principle, we used two different CNS-specific TVA-transgenic lines  
408 (*Nestin-tv-a* and *GFAP-tv-a*) to perform functional characterization of various genetic alterations  
409 described in human gliomas: 1) knockout of a panel of TSGs recurrently lost or mutated in  
410 GBMs (*TP53*, *CDKN2A* and *PTEN*), 2) genomic rearrangements identified in different subtypes  
411 of gliomas (*BCAN-NTRK1* and *MYB-QKI*) and 3) a point mutation (*BRAF*<sup>V600E</sup>) present in a  
412 variety of pediatric and adult gliomas.

413 For the TSGs we selected *Trp53*, *Cdkn2a* and *Pten*, since they were previously shown to  
414 cooperate with PDGFB overexpression to induce high-grade gliomas<sup>13,18</sup>. Indeed, co-injection of  
415 gRNAs targeting those genes led to the formation of GBMs with high frequency. These data  
416 would suggest that combining the expression of specific oncogene drivers with gRNAs for a  
417 TSG of interest would quickly provide information on its contribution to the tumorigenesis  
418 process. Moreover, by using the *hUBC-CreERT2*<sup>+T</sup> or other Cre-inducible strains it will be  
419 possible to exploit the RCAS/TVA-CRISPR/Cas9 system not only to study tumor initiation, but  
420 also tumor progression and maintenance.

421 Due to the quite recent advancement in the CRISPR/Cas9 technology, very few mouse  
422 models have been previously developed to study brain tumorigenesis<sup>38-40</sup>. By *in utero*  
423 electroporation (IUE) of the forebrain of mouse embryos using plasmids encoding Cas9 in  
424 combination with gRNAs targeting *Nf1*, *Trp53* and *Pten*, Zuckerman and Chen were able to  
425 induce highly aggressive tumors that had histopathological features of human GBMs. More  
426 recently, Cook and colleagues have used adenoviral (Ad) vectors to express Cas9 and to generate  
427 the *BCAN-NTRK1* rearrangement in the brain of adult mice<sup>40</sup>.

428 In our opinion there are at least two key issues with the use of IUE and Ad for glioma  
429 CRISPR/Cas9 modeling: timing of the gRNA delivery and lack of specificity of the targeted  
430 cells. Electroporation is normally performed at E14.5 or E15.5 and genetic alterations at this  
431 gestational stage might not be necessarily reflecting the biology of gliomas in the adult. The  
432 second issue is that the expression of the Cas9 enzyme from a constitutive promoter, as it has  
433 been used in both IUE and Ad studies, does not allow genome editing in a cell-type-specific

434 manner hence not restricting the genetic alteration to the putative cells of origin of gliomas. This  
435 latter point is particularly relevant for proper cancer modeling, since it has been shown that the  
436 same driver mutations can lead to phenotypically and molecularly diverse glioma subtypes from  
437 different pools of adult CNS progenitor cells<sup>41,42</sup>.

438 The CRISPR/Cas9 system has been previously used to model genomic rearrangements  
439 both in human and mouse cells<sup>43-45</sup>. Here we generated the *Bcan-Ntrk1* gene fusion, via a  
440 microdeletion of 0.2Mb on Chr3, and the *Myb-Qk* gene fusion, by a chromosomal translocation.  
441 Fusion transcripts can generally lead to at least four different situations: a) increased  
442 overexpression of an oncogene (e.g. *IgH-MYC* in leukemia), b) deregulation of a tumor  
443 suppressor gene (e.g. *CHEK2-PP2R2A* in childhood teratoma), c) generation of a new aberrant  
444 protein (e.g. *BCR-ABL1* in leukemia), and d) a combination of various of the above (e.g. *MYB-*  
445 *QKI* in angiocentric glioma)<sup>32,46</sup>.

446 We have observed that the *NTRK1* gene fusions lead to overexpression of the chimeric  
447 *NTRK1* transcripts in human glioma patients and in our mouse model (Supplementary Fig. 4c  
448 and 4i). Most likely, the very pronounced levels of TrkA kinase activity achieved by the high  
449 levels of the chimeric *NTRK1* transcripts are responsible for the oncogenic activity of those  
450 fusions. Indeed, we observed that the *Bcan-Ntrk1* tumors were finely sensitive to the pan-Trk  
451 inhibitor Entrectinib.

452 The *MYB-QKI* rearrangement has been shown to drive tumorigenesis through a tripartite  
453 mechanism: MYB activation by truncation, aberrant MYB-QKI expression and hemizygous loss  
454 of the tumor suppressor *QKI*<sup>32</sup>. Using the RCAS/TVA-CRISPR/Cas9 system we successfully  
455 generated the *Myb-Qk* gene fusion in mouse cells and indeed we observed an increased *Myb*  
456 activation, as shown by upregulation of some Myb-regulated genes (*ErbB2*, *Cdk6* and *Slc9a31*)  
457 (Fig. 5d). Although it is conceivable that loss of the *Qk* gene is contributing to the tumorigenic  
458 potential of the cells carrying the *Myb-Qk* gene fusion, further work will be needed to clarify it.

459 Despite that the generation of point mutations with the CRISPR/Cas9 system might  
460 represent one of the most powerful feature of this genome editing technology, it is also the most  
461 challenging and very few cancer models have been developed with it<sup>4,47-49</sup>. Here we generated  
462 the first CRISPR/Cas9 model for the BRAF V600E mutation.

463 BRAF V600E mutation has been identified in approximately 60% of pleomorphic  
464 xanthoastrocytomas (PXAs), as well as in varying percentages of other types of gliomas. Very

465 interestingly, the tumors that carried the *Braf*<sup>V637E</sup> knockin mutation (homologous to the human  
466 *BRAF*<sup>V600E</sup> mutant allele) resemble the epithelioid variant of glioblastoma. The tumor cells  
467 exhibit epithelioid features and discohesiveness reminiscent of this entity. Epithelioid GBMs (E-  
468 GBM) feature high rates of BRAF V600E mutation and are thought to arise from the malignant  
469 transformation of PXAs<sup>50,51</sup>. Here we have shown that *Braf*<sup>V637E</sup> tumors are quite sensitive to  
470 Dabrafenib treatment, suggesting that this inhibitor might represent a possible therapeutic  
471 approach for those glioma types.

472 In conclusion, we have developed an extremely powerful and versatile mouse model that  
473 combines the somatic genome transfer ability of the RCAS/TVA system with the CRISPR/Cas9  
474 genome editing technology. We believe that such a flexible model will greatly expedite the  
475 generation of precise cancer models.

476

## 477 **Methods**

### 478 **DNA constructs, Design and Cloning of guide RNAs**

479 The pKLV-U6gRNA-PGKpuro2ABFP (Plasmid #50946)<sup>52</sup>, lentiCas9-Blast (Plasmid  
480 #52962)<sup>53</sup> and pMSCVhygro-CRE (Plasmid #34565)<sup>54</sup> were obtained from Addgene. The  
481 retroviral RCAS Gateway Destination Vector (RCAS-Y-DV)<sup>16</sup> was kindly provided by Eric  
482 Holland. To sub-clone the gRNA into the RCAS-Y-DV vector we generated a pDONR-gRNA  
483 plasmid, by a multiple steps process. First, the region containing the hU6 promoter, *BbsI* cloning  
484 sites, gRNA scaffold, PGK promoter, and selectable markers Puromycin and BFP (Blue  
485 Fluorescent protein) (hU6-gRNA-PGK-Puro-T2A-BFP) was amplified by PCR from the pKLV-  
486 U6gRNA-PGKpuro2ABFP plasmid using the Platinum Pfx Kit (Invitrogen, Cat. 11708-013) and  
487 the primers aTTB Fw and aTTB Rv (Supplementary Table1). The PCR-amplified product was  
488 transferred by site-specific recombination (Gateway BP Clonase, Invitrogen, Cat. 11789-020)  
489 into the pDONR221 Vector (Invitrogen, Cat. 12536017) following manufacturer's instructions.  
490 Lastly, the *BbsI* restriction site at position 437 was removed by site-directed mutagenesis  
491 (QuikChange Lightning Site-Directed Mutagenesis kit, Agilent, Cat. 210518) using the primers  
492 pDONR\_BbsI\_mut-Fw and Rv (Supplementary Table1). This step was necessary to remove,  
493 from the pDONR221, a *BbsI* restriction site outside the gRNA cloning site.

494 To generate the pDONR-gRNA that expressed also the PDGFB-HA, we performed a  
495 PCR using the Platinum Pfx Kit and the primers pDONR-Fw and Rv for the backbone and



496 PDGFB-Fw and Rv for the insert (Supplementary Table1). The two fragments were then  
497 assembled using the Gibson Assembly Master Mix (New England Biolabs, Cat. E2611L). To  
498 obtain the final plasmid, the *BbsI* restriction site in the PDGFB sequence (pDONR-sgRNA-  
499 PDGFB position 2822) was removed by site-directed mutagenesis using the primers PDGFB\_  
500 *BbsI\_mut*-Fw and Rv.

501 The pDONR-gRNA plasmids were recombined into the RCAS-Y-DV using the Gateway  
502 LR Clonase II Enzyme mix (Invitrogen, Cat. 11791100), following the manufacturer's  
503 instructions. All the constructs were verified by Sanger-sequencing.

504 The gRNA sequences targeting *Cdkn2a*, *Pten* and *Tp53* were previously described<sup>38,55,56</sup>.  
505 *Bcan*, *Ntrk1*, *Myb*, *Qk* and *Braf* gRNAs were designed using the Genetic Perturbation Platform  
506 web portal (<http://portals.broadinstitute.org/gpp/public/analysis-tools/gRNA-design>).

507 For cloning of single gRNAs, oligonucleotides containing the *BbsI* site and the specific  
508 gRNA sequences were annealed, phosphorylated and ligated either into the pDONR-gRNA or  
509 the pKLV-U6gRNA(*BbsI*)-PGKpuro2ABFP previously digested with *BbsI*. The cloning of the  
510 paired gRNA was done according to the protocol described by Vidigal and colleagues<sup>30</sup>. Briefly,  
511 the oligonucleotides containing the different gRNA-pairs (Supplementary Table1) were  
512 amplified with Phusion High-Fidelity polymerase (New England Biolabs, M0530S) using primer  
513 F5 and R1 (Supplementary Table1). PCR products were gel-purified and ligated to *BbsI*-digested  
514 pDonor\_mU6 plasmid (kindly provided by A. Ventura) by using the Gibson Assembly Master  
515 Mix (New England Biolabs 174E2611S). The Gibson reaction was then digested with *BbsI* at  
516 37 °C for 3 h. The linearized fragment containing the pair gRNA, the mU6 promoter and the  
517 gRNA scaffold was gel-purified and cloned into the pDONR-gRNA and then into the RCAS-Y-  
518 DV.

519 The *Braf* V637E HDR donor (Supplemental Data 1) was synthesized using the GeneArt  
520 service from ThermoFischer Scientific and subsequently cloned into the *PacI* restriction site into  
521 the pKLV-U6-*Braf* gRNA-PGKpuro2ABFP.

522

### 523 **Cell Lines, Transfections, Infections and Reagents**

524 The mouse embryo fibroblast NIH-3T3-TVA cells, kindly provided by Eric Holland,  
525 were cultured in DMEM (Sigma-Aldrich, Cat. D5796) + 10% CS (Sigma-Aldrich, Cat. C8056).  
526 The Gp2-293 packaging cell line (Clontech, Cat. 631458) were grown in DMEM (Sigma-

527 Aldrich, Cat. D5796) + 10% FBS (Sigma-Aldrich, Cat. F7524). DF1 chicken fibroblasts (ATCC,  
528 Cat. CRL-12203) were grown at 39°C in DMEM containing GlutaMAX-I (Gibco, Cat. 31966-  
529 021) and 10% FBS (Sigma-Aldrich, Cat. F7524). The mouse neuronal stem cells (NSCs) used to  
530 test gRNA *in vitro* and *in vivo* were derived from the whole brain of newborn mice of *Ntv-a*;  
531 *LSL-Cas9* and *Gtv-a*; *hGFAP-Cre*; *LSL-Cas9*; *p53<sup>lox/lox</sup>*, respectively. NSCs and tumorspheres  
532 were grown in Mouse NeuroCult proliferation kit (Stem Cell Technologies, Cat. 05702),  
533 supplemented with 10ng/ml recombinant human EGF (Gibco, Cat. PHG0313), 20ng/ml basic-  
534 FGF (Sigma-Aldrich, Cat. F0291-25UG), and 1mg/ml Heparin (Stem Cell Technologies, Cat.  
535 07980).

536 *Ntv-a*; *LSL-Cas9* and NIH-3T3-TVA cells were subsequently infected with either the  
537 pMSCVhygro-CRE or lentiCas9-Blast, respectively, to induce Cas9 expression.

538 DF1 cells were transfected with the different RCAS-gRNA retroviral plasmids using  
539 FuGENE 6 Transfection reagent (Promega, Cat. E2691), accordingly to manufacturer's protocol.  
540 DF1 RCAS-virus containing media was used to infect NSCs and NIH-3T3-TVA-Cas9. NSCs  
541 were infected with four cycles of spin infection (1000rpm for 2hr) and then selected with 1µg/ml  
542 Puromycin (Sigma-Aldrich, Cat. P8833-25MG).

543 Viruses, other than RCAS, were generated in Gp2-293 using calcium-phosphate  
544 precipitate transfection: lentiviruses (pKLV-U6gRNA-PGKpuro2ABFP and lentiCas9-Blast)  
545 were produced by co-transfection with 2nd generation packaging vectors (pMD2G and psPAX2)  
546 and retroviruses (pMSCVhygro-CRE) with VSVg packaging vector. High-titer virus was  
547 collected at 36 and 60hr following transfection and used to infect cells in presence of 7µg/ml  
548 polybrene (Sigma-Aldrich, Cat. H9268-5G) for 12hr. Transduced cells were selected after 48hr  
549 from the last infection with Blasticidin (3µg/ml) (Gibco, Cat. A11139-03) or Hygromycin  
550 (300µg/ml) (Sigma-Aldrich, Cat. H3274-25MG).

551 Entrectinib (RXDX-101) and Dabrafenib (GSK2118436) were purchased from  
552 Selleckchem (Cat. S7998 and S2807, respectively).

### 553 NSCs and Tumorspheres Preparation

554 For the derivation of mouse NSCs and tumor neurospheres, the tissue was enzymatically  
555 digested with 5 ml of papain digestion solution (0.94 mg/ml papain (Worthington, Cat.  
556 LS003119), 0.48mM EDTA, 0.18mg/ml *N*-acetyl-L-cysteine (Sigma-Aldrich, Cat. A9165-5G) in

557 Earl's Balanced Salt Solution (EBSS) (Gibco, Cat. 14155-08)) and incubated at 37°C for 8min.  
558 After digestion, the enzyme was inactivated by the addition of 2ml of 0.71mg/ml ovomucoid  
559 (Worthington, Cat. LS003087) and 0.06mg/ml DNaseI (Sigma-Aldrich, Cat. 10104159001)  
560 diluted in Mouse Neurocult NSC basal medium (Stem Cell Technologies, Cat. 05700) without  
561 growth factors. The cell suspension was then passed through a 40µm mesh filter to remove  
562 undigested tissue, washed first with PBS and then with 3 ml of ACK lysing buffer (Gibco, Cat.  
563 A1049201). Single cells suspension was then centrifuged at a low speed and resuspended in  
564 Mouse NeuroCult proliferation kit (Stem Cell Technologies, Cat. 05702), supplemented with  
565 10ng/ml recombinant human EGF (Gibco, Cat. PHG0313), 20ng/ml basic-FGF (Sigma-Aldrich,  
566 Cat. F0291-25UG), and 1mg/ml Heparin (Stem Cell Technologies, Cat. 07980).

567

### 568 **Free Floating ImmunoFluorescence (FF-IF)**

569 Adult (4-6 weeks) and pups (1 day) brains were fixed with PFA 4% (Electron  
570 Microscopy Sciences, Cat. 15713) and then incubated with sucrose 15% and 30%. Each step was  
571 done overnight at 4°C. Brains were then sectioned by using a sliding microtome with freezing  
572 stage (Fisher). Sections of 80 µm were blocked in Goat Serum 10%, BSA 2%, Triton 0.25% and  
573 mouse on mouse blocking reagent (Vectors Laboratories, Cat. BMK-2202) in PBS for 2hr at  
574 room temperature (RT). Primary antibodies were incubated overnight at 4°C in the blocking  
575 solution and the following day for 30 min at RT as detailed: GFAP (Millipore, MAB360, 1:500),  
576 NESTIN (BD Pharmingen, #556309, 1:100) and EGFP (Aves Labs, GFP-1010, 1:1000). Slices  
577 were then washed in PBS-Triton 0.25% and incubated with the secondary antibody for 2hr.  
578 Secondary antibodies were from Invitrogen (Alexa-Fluor anti-chicken<sup>488</sup>, anti-rabbit<sup>555</sup>, anti-  
579 mouse<sup>555</sup>). After extensive washing in PBS-Triton 0.25%, nuclei were stained with DAPI for  
580 3 min at RT. Sections were mounted with ProLong Gold Antifade reagent (Invitrogen, Cat.  
581 P10144).

582 Brain mapping was performed with a TCS SP5 confocal microscope (Leica  
583 Microsystems) equipped with Leica HCS-A and custom made iMSRC software<sup>57</sup>. Final images  
584 were acquired with a 20x 0.7 N.A. dry objective. The regions of interest definition were done on  
585 mosaics of the full brain sections acquired with a 10 x 0.4 N.A. dry objective.

### 586 **Immunoblotting**

587 Cell pellets were lysed with JS lysis buffer (50mM HPES, 150mM NaCl, 1% Glycerol,  
588 1% Triton X-100, 1.5mM MgCl<sub>2</sub>, 5mM EGTA) and protein concentrations were determined by  
589 DC protein assay kit (Biorad). Proteins were separated on house-made SDS-PAGE gels and  
590 transferred to nitrocellulose membrane (Amersham). Membranes were incubated in blocking  
591 buffer (5% milk 0.1% Tween, 10 mM Tris at pH 7.6, 100 mM NaCl) and then with primary  
592 antibody either 1 hour at room temperature or overnight at 4°C according to the antibody.  
593 Antibodies used for western-blot are: TP53 (Cell Signaling Technology, #2524, 1:1000), PTEN  
594 (Cell Signaling Technology, #9188, 1:1000), CDKN2A (Santa Cruz Biotechnology, sc-32748,  
595 1:500), pERK (Cell Signaling Technology, #9101, 1:2000), total ERK (Cell Signaling  
596 Technology, #9102, 1:1000), pMEK (Cell Signaling Technology, #9154, 1:500), total MEK  
597 (Santa Cruz Biotechnology, sc-219, 1:500) and VINCULIN (Sigma-Aldrich, V9131, 1:10000).  
598 Anti-mouse or rabbit-HRP conjugated antibodies (Jackson Immunoresearch) were used to detect  
599 desired protein by chemiluminescence with ECL (Amersham, RPN2106).

600

### 601 **Immunohistochemistry**

602 Tissue samples were fixed in 10% formalin, paraffin-embedded and cut in 3µm sections,  
603 which were mounted in superfrostplus microscope slides and dried. Tissues were deparaffinized  
604 in xylene and re-hydrated through a series of graded ethanol until water. For histopathological  
605 analysis, sections were stained with hematoxylin and eosin (H&E). For immunohistochemistry,  
606 paraffin sections underwent first antigenic exposure process, endogenous peroxidase was  
607 blocked and the slides were then incubated in blocking solution (2.5% BSA, 10% goat serum,  
608 with or without mouse on mouse IgG (MOM), according to the species of primary antibody, in  
609 PBS). Incubation with the appropriate primary antibodies was carried out over-night as detailed:  
610 GFAP (Millipore MAB360, 1: 500), NeuN (Millipore, MAB377, 1:100), OLIG2 (Millipore,  
611 AB9610, 1:400), NESTIN (BD Pharmingen, #556309, 1:100), PTEN (Cell Signaling  
612 Technology, #9559, 1:100) and CDKN2A (Santa Cruz Biotechnology, sc-32748, 1:100). After  
613 incubating with the primary antibody, all slides were incubated with appropriate secondary  
614 antibodies and the visualization system AB solution (AB solution-Vector, Ref. PK-6100).  
615 Finally, slides were dehydrated, cleared and mounted with a permanent mounting medium. The  
616 immunohistochemistry for TP53 (CNIO monoclonal antibody core, clone POE316A, 1:100),  
617 KI67 (Master Diagnostica, #0003110QD, undiluted), Cas9 (Cell Signaling Technology, #14697,

618 1:100), pan-TRK (Cell Signaling Technology, #92991, 1:100) were performed using an  
619 automated immunostaining platform (Ventana discovery XT, Roche). BRAF<sup>V600E</sup>  
620 immunostaining was performed on a Leica Bond-III stainer (Leica Biosystem, Newcastle, UK)  
621 with a 1:100 dilution of anti-BRAF<sup>V600E</sup> (VE1) mouse monoclonal primary antibody (Spring  
622 Bioscience, Pleasanton, CA).

### 623 **Blood Counts and Flow Cytometry**

624 For the analysis of the Cas9-induced immune response, 4 weeks old *Ntv-a; LSL-Cas9;*  
625 *hUBC-CreERT2* mice were fed *ad libitum* with tamoxifen containing diet for the duration of the  
626 experiment (Supplementary Fig. 3a).

627 Complete blood counts were carried out using the Abacus Junior Vet (Diatron). Cells  
628 were isolated from spleen and brain by mechanical disruption. Red Blood Cells were lysed using  
629 the red blood cell lysis buffer (Sigma-Aldrich). All cells were stained with CD45-PerCP  
630 (Biolegend, #103130, 1:200), CD3-AF700 (eBiosciences, #56-0032, 1:100), CD4-PECy7 (BD  
631 Pharmingen, #552775, 1:200), Gr-1-PE (BD Pharmingen, #553128, 1:200), CD11b-PerCPCy5.5  
632 (BD Pharmingen, #550993, 1:30) and B-220-APC-CY7 (BD Pharmingen, #552094, 1:200).  
633 Samples were acquired in an LSR Fortessa (BD, San Jose CA) equipped with 355nm, 488nm,  
634 561nm and 640nm lines. We used pulse processing to exclude cell aggregates and DAPI to  
635 exclude dead cells. All data were analyzed using FlowJo 9.9.4 (Treestar, Oregon).

### 636 **Cell Proliferation, Soft-Agar Assay and Cell Cycle Analysis**

637 NSCs and tumorspheres cells were seeded in 96-well culture plates (4,000 per well) in  
638 quintuplicate and treated for 96hr. At the end of the incubation period, survival of cells was  
639 determined by the MTT assay. Briefly, MTT was added to each well and samples were incubated  
640 for 4h before lysing in formazan dissolving solution. Colorimetric intensity was quantified using  
641 an ELISA reader at 590 nm. Values were obtained after subtraction of matched blanks (medium  
642 only). The OD values of DMSO controls were taken as 100% and values for drug treatment are  
643 expressed as % of control.

644 The soft-agar growth assay was performed by seeding cells in triplicates at 300,000  
645 cells/well in NSCs culture medium containing 0.4% Noble agar (Sigma-Aldrich, Cat. A5431).  
646 Cells were plated on top of a layer of NSCs culture medium containing 0.65% Nobel agar.

647 Colonies were stained 3 weeks after plating with 2mg/ml of thiazolyl blue tetrazolim bromide  
648 (Sigma-Aldrich, Cat. M5655) for 1h at 37°C.

649 For the cell cycle analysis, cells were fixed with 70% cold ethanol for 2hr. Fixed cells  
650 were treated with RNase for 20min before addition of 50µg/ml propidium iodide (PI) and  
651 analyzed by FACS.

652

### 653 **Reverse Transcription Quantitative PCR and Analysis of cDNA fragments**

654 RNA from NSCs and frozen tissue was isolated with TRIzol reagent (Invitrogen, Cat.  
655 15596-026) according to the manufacturer's instructions. For reverse transcription PCR (RT-  
656 PCR), 500ng of total RNA was reverse transcribed using the High Capacity cDNA Reverse  
657 Transcription Kit (Applied Biosystems, Cat. 4368814). The cDNA was used either for  
658 quantitative PCR or Sanger sequencing. Quantitative PCR was performed using the SYBR-  
659 Select Master Mix (Applied Biosystems, Cat. 4472908) according to the manufacturer's  
660 instructions. qPCRs were run and the melting curves of the amplified products were used to  
661 determine the specificity of the amplification. The threshold cycle number for the genes analyzed  
662 was normalized to GAPDH. Sequences of the primers used are listed in (Supplementary Table1).

663 For Sanger sequencing PCR fragments, cDNA was PCR-amplified using primers listed in  
664 (Supplementary Table1), in-gel purified and ligated into the pGEM-T Easy vector (Promega,  
665 Cat. A1360) and submitted to sequence.

666

### 667 **Genomic DNA Isolation and Analysis**

668 Genomic DNA was isolated by proteinase K/sodium dodecyl sulfate (SDS)/phenol  
669 extraction method described briefly below. Cell pellets were incubated in lysis buffer (10mM  
670 Tris-HCl pH8, 100mM NaCl, 0.5mM EDTA, 10% SDS and proteinase K) for 4h at 55°C.  
671 Samples were extracted using phenol:chloroform (1:1) and Phase Lock heavy 2ml tubes  
672 (5PRIME, Cat. 2302830). The aqueous phase was recovered to fresh tubes and 0.1M sodium  
673 acetate and 100% cold ethanol were added. Samples were centrifuged at 15000rpm for 25min.  
674 After washing in 70% cold ethanol, draining and dissolving in water, genomic DNA was  
675 quantified. 100ng of DNA were amplified with specific primers listed in (Supplementary  
676 Table1). PCR products were cloned into the pGEM-T Easy vector and submitted for sequencing.

677

678 **Fluorescence *in situ* Hybridization (FISH)**

679 Two sets of FISH probes were used to study the deletion between the *Ntrk1* and *Bcan* mouse  
680 genes. BMQ-437D10 bacterial artificial chromosome (BAC) that map at the intergenic *Ntrk1*-  
681 *Bcan* (3qF1 cytoband), was purchased from Source Bioscience and labelled by Nick translation  
682 assay with Texas Red fluorochrome to generate a locus-specific FISH probe. BMQ-386N22  
683 BAC clone (3qA3 cytoband) was labelled with Spectrum Green fluorochrome to generate a  
684 control probe to enumerate mouse chromosome 3. FISH analyses were performed according to  
685 the manufacturers' instructions, as previously described<sup>58</sup>, on Carnoy's fixed cells mounted on  
686 positively charged slides (SuperFrost, Thermo Scientific). Briefly, the slides were first  
687 dehydrated followed by a denaturing step in the presence of the FISH probe at 85°C for  
688 10min and left overnight for hybridization at 45°C in a DAKO hybridizer machine. Finally, the  
689 slides were washed with 20×SSC (saline-sodium citrate) buffer with detergent Tween-20 at  
690 63°C, and mounted in fluorescence mounting medium (DAPI). FISH signals were manually  
691 enumerated within nuclei. FISH images were also captured using a CCD camera (Photometrics  
692 SenSys camera) connected to a PC running the Zytovision image analysis system (Applied  
693 Imaging Ltd., UK) with focus motor and Z stack software.

694

695 **Analysis of gene expression in normal and tumor tissues.**

696 RNA-seq data for human normal brain samples were downloaded from the GTEx data  
697 portal (<https://www.gtexportal.org/>). ENCODE mouse brain expression data were downloaded  
698 from the NCBI (<https://www.ncbi.nlm.nih.gov/gene/>). RNA-seq data for *NTRK1* in the TCGA  
699 GBMLGG dataset were downloaded from the GlioVis data portal (<http://gliovis.bioinfo.cnio.es>)  
700<sup>59</sup>. Sample IDs of patients carrying *NTRK1* gene fusions were either previously described<sup>28</sup> or  
701 obtained from the TCGA Fusion gene Data Portal (<http://54.84.12.177/PanCanFusV2/>).

702 **Statistical analysis**

703 Data in bar graphs are presented as mean and SD, except otherwise indicated. Results  
704 were analyzed by unpaired two-tailed Student's *t*-tests using the R programming language<sup>60</sup>.  
705 Kaplan–Meier survival curve were produced using the “survminer” R package and *P* values were  
706 generated using the Log-Rank statistic. Box-plots were made with the “ggplot2” R package.  
707 Drug dose response curves were produced with GraphPad Prism.

708

## 709 **Mouse Strains and Husbandry**

710 *Nestin-tv-a* and *GFAP-tv-a*<sup>8,9</sup> were generously provided by Eric Holland. *Rosa26-LSL-*  
711 *Cas9* knockin mouse strain<sup>4</sup> was purchased from The Jackson laboratory (Cat. 024857). *Nestin-*  
712 *Cre*<sup>11</sup>, *hGFAP-Cre*<sup>10</sup>, *hUBC-CreERT2*<sup>12</sup> transgenic lines were kindly provided by various  
713 researchers at the Spanish National Cancer Research Center (Marcos Malumbres, Mariano  
714 Barbacid and Maria Blasco).

715 Mice were housed in the specific pathogen-free animal house of the Spanish National  
716 Cancer Centre under conditions in accordance with the recommendations of the Federation of  
717 European Laboratory Animal Science Associations (FELASA). All animal experiments were  
718 approved by the Ethical Committee (CEIyBA) and performed in accordance with the guidelines  
719 stated in the International Guiding Principles for Biomedical Research Involving Animals,  
720 developed by the Council for International Organizations of Medical Sciences (CIOMS).

721

## 722 **Generation of Murine Gliomas**

723 For the RCAS-mediated gliomagenesis, newborns or 4-6 weeks old mice, were injected  
724 intracranially with  $4 \times 10^5$  DF1 cells 1:1 dilution between RCAS-PDGFB and RCAS-gRNA  
725 expressing cells per mouse. For the *p53-null* TVA-Cas9 NSCs infected with the RCAS-gRNA-  
726 pairs or the pKLV-Braf-V637E-HDR, 4-5 weeks old immunodeficient *NOD/SCID* mice were  
727 injected intracranially with  $5 \times 10^5$  cells. Adults mice were anaesthetized by 4% isoflurane and  
728 then injected with a stereotactic apparatus (Stoelting) as previously described<sup>13</sup>.

729 For the Cas9-inducible tumor model (*Ntv-a*; *LSL-Cas9*; *hUBC-CreERT2*), two weeks  
730 after DF1 RCAS-gRNA plasmid injection, mice received intraperitoneal injections of 4-  
731 Hydroxytamoxifen (Sigma-Aldrich, Cat. H6278) (2mg/injection, 4-6 injections).

732 After intracranial injection, mice were checked until they developed symptoms of disease  
733 (lethargy, poor grooming, weight loss, macrocephaly).

734

735



736 **Author contributions**

737 BO supervised and performed experiments and contributed to write the manuscript. AC-G, CM  
738 and VM performed experiments. OU contributed to the analysis of the immune response. SR-P  
739 and RR-T performed the FISH analysis. JH helped with histopathological analysis of the tumor  
740 tissues. MS designed, supervised and performed experiments and wrote the manuscript.

741

742 **Acknowledgments**

743 ACG is recipient of a Severo-Ochoa PhD fellowship. CM and VM are recipient of a “La Caixa”  
744 PhD fellowship. We thank A. J. Schuhmacher for the initial assistance with the intracranially  
745 injections in adult mice and C.S. Clemente-Troncone for the technical support. We thank David  
746 Olmeda and Marisol Soengas for sharing reagents. We sincerely thank Dr. José Luis Rguez  
747 Peralto (“Hospital U. 12 de Octubre”, Madrid) for the BRAF V600 IHCs staining. This research  
748 was supported by funds from the “Acción Estratégica en Salud” Spanish National Research and  
749 Development Plan, Instituto de Salud Carlos III (ISCIII), cofounder by FEDER (ERDF)  
750 (PI14/01884) to S.R-P, by a “*Beca Leonardo a Investigadores y Creadores Culturales 2017*”  
751 from the BBVA Foundation and a grant from the Seve Ballesteros Foundation to MS.

752

753 **References**

- 754 1. Vogelstein, B. *et al.* Cancer genome landscapes. *Science* **339**, 1546–58 (2013).
- 755 2. Lawrence, M. S. *et al.* Discovery and saturation analysis of cancer genes across 21 tumour  
756 types. *Nature* **505**, 495–501 (2014).
- 757 3. Mou, H., Kennedy, Z., Anderson, D. G., Yin, H. & Xue, W. Precision cancer mouse  
758 models through genome editing with CRISPR-Cas9. *Genome Med.* **7**, 53 (2015).
- 759 4. Platt, R. J. *et al.* CRISPR-Cas9 knockin mice for genome editing and cancer modeling.  
760 *Cell* **159**, 440–55 (2014).
- 761 5. Chiou, S.-H. *et al.* Pancreatic cancer modeling using retrograde viral vector delivery and  
762 in vivo CRISPR/Cas9-mediated somatic genome editing. *Genes Dev.* **29**, 1576–85 (2015).
- 763 6. Dow, L. E. *et al.* Inducible in vivo genome editing with CRISPR-Cas9. *Nat. Biotechnol.*  
764 **33**, 390–394 (2015).
- 765 7. von Werder, A., Seidler, B., Schmid, R. M., Schneider, G. & Saur, D. Production of avian  
766 retroviruses and tissue-specific somatic retroviral gene transfer in vivo using the  
767 RCAS/TVA system. *Nat. Protoc.* **7**, 1167–1183 (2012).
- 768 8. Holland, E. C., Hively, W. P., DePinho, R. A. & Varmus, H. E. A constitutively active  
769 epidermal growth factor receptor cooperates with disruption of G1 cell-cycle arrest  
770 pathways to induce glioma-like lesions in mice. *Genes Dev.* **12**, 3675–3685 (1998).
- 771 9. Holland, E. C. & Varmus, H. E. Basic fibroblast growth factor induces cell migration and  
772 proliferation after glia-specific gene transfer in mice. *Proc. Natl. Acad. Sci. U. S. A.* **95**,  
773 1218–23 (1998).
- 774 10. Zhuo, L. *et al.* hGFAP-cre transgenic mice for manipulation of glial and neuronal function  
775 in vivo. *Genesis* **31**, 85–94 (2001).
- 776 11. Tronche, F. *et al.* Disruption of the glucocorticoid receptor gene in the nervous system  
777 results in reduced anxiety. *Nat. Genet.* **23**, 99–103 (1999).
- 778 12. Ruzankina, Y. *et al.* Deletion of the Developmentally Essential Gene ATR in Adult Mice  
779 Leads to Age-Related Phenotypes and Stem Cell Loss. *Cell Stem Cell* **1**, 113–126 (2007).
- 780 13. Hambardzumyan, D., Amankulor, N. M., Helmy, K. Y., Becher, O. J. & Holland, E. C.  
781 Modeling Adult Gliomas Using RCAS/t-va Technology. *Transl. Oncol.* **2**, 89–95 (2009).
- 782 14. Robinson, J. P. *et al.* Activated BRAF induces gliomas in mice when combined with  
783 Ink4a/Arf loss or Akt activation. *Oncogene* **29**, 335–344 (2010).

- 784 15. Fisher, G. H. *et al.* Development of a flexible and specific gene delivery system for  
785 production of murine tumor models. *Oncogene* **18**, 5253–5260 (1999).
- 786 16. Loftus, S. K., Larson, D. M., Watkins-Chow, D., Church, D. M. & Pavan, W. J.  
787 Generation of RCAS Vectors Useful for Functional Genomic Analyses. *DNA Res.* **8**, 221–  
788 226 (2001).
- 789 17. Shih, A. H. *et al.* Dose-Dependent Effects of Platelet-Derived Growth Factor-B on Glial  
790 Tumorigenesis. *Cancer Res.* **64**, (2004).
- 791 18. Squatrito, M. *et al.* Loss of ATM/Chk2/p53 pathway components accelerates tumor  
792 development and contributes to radiation resistance in gliomas. *Cancer Cell* **18**, 619–29  
793 (2010).
- 794 19. Dai, C. *et al.* PDGF autocrine stimulation dedifferentiates cultured astrocytes and induces  
795 oligodendrogliomas and oligoastrocytomas from neural progenitors and astrocytes in vivo.  
796 *Genes Dev.* **15**, 1913–25 (2001).
- 797 20. Wang, D. *et al.* Adenovirus-Mediated Somatic Genome Editing of Pten by CRISPR/Cas9  
798 in Mouse Liver in Spite of Cas9-Specific Immune Responses. *Hum. Gene Ther.* **26**, 432–  
799 42 (2015).
- 800 21. Chew, W. L. *et al.* A multifunctional AAV-CRISPR-Cas9 and its host response. *Nat.*  
801 *Methods* **13**, 868–74 (2016).
- 802 22. Staahl, B. T. *et al.* Efficient genome editing in the mouse brain by local delivery of  
803 engineered Cas9 ribonucleoprotein complexes. *Nat. Biotechnol.* **35**, 3–1 (2017).
- 804 23. Bennett, M. L. *et al.* New tools for studying microglia in the mouse and human CNS.  
805 *Proc. Natl. Acad. Sci.* **113**, E1738–E1746 (2016).
- 806 24. Shah, N. *et al.* Exploration of the gene fusion landscape of glioblastoma using  
807 transcriptome sequencing and copy number data. *BMC Genomics* **14**, 818 (2013).
- 808 25. Ceccarelli, M. *et al.* Molecular Profiling Reveals Biologically Discrete Subsets and  
809 Pathways of Progression in Diffuse Glioma. *Cell* **164**, 550–63 (2016).
- 810 26. Brennan, C. W. *et al.* The Somatic Genomic Landscape of Glioblastoma. *Cell* **155**, 462–  
811 477 (2013).
- 812 27. Vaishnavi, A., Le, A. T. & Doebele, R. C. TRKking Down an Old Oncogene in a New Era  
813 of Targeted Therapy. *Cancer Discov.* **5**, 25–34 (2015).
- 814 28. Kim, J. *et al.* NTRK1 Fusion in Glioblastoma Multiforme. *PLoS One* **9**, e91940 (2014).

- 815 29. Alvarez-Breckenridge, C. *et al.* Clinical and radiographic response following targeting of  
816 BCAN-NTRK1 fusion in glioneuronal tumor. *npj Precis. Oncol.* **1**, (2017).
- 817 30. Vidigal, J. A. & Ventura, A. Rapid and efficient one-step generation of paired gRNA  
818 CRISPR-Cas9 libraries. *Nat. Commun.* **6**, 8083 (2015).
- 819 31. Amatu, A., Sartore-Bianchi, A. & Siena, S. NTRK gene fusions as novel targets of cancer  
820 therapy across multiple tumour types. *ESMO open* **1**, e000023 (2016).
- 821 32. Bandopadhyay, P. *et al.* MYB-QKI rearrangements in angiocentric glioma drive  
822 tumorigenicity through a tripartite mechanism. *Nat. Genet.* **48**, 273–282 (2016).
- 823 33. Dahiya, S. *et al.* BRAF-V600E mutation in pediatric and adult glioblastoma. *Neuro.*  
824 *Oncol.* **16**, 318–9 (2014).
- 825 34. Ahronian, L. G. & Lewis, B. C. Using the RCAS-TVA System to Model Human Cancer  
826 in Mice. *Cold Spring Harb. Protoc.* **2014**, pdb.top069831-top069831 (2014).
- 827 35. Seidler, B. *et al.* A Cre-loxP-based mouse model for conditional somatic gene expression  
828 and knockdown in vivo by using avian retroviral vectors. *Proc. Natl. Acad. Sci.* **105**,  
829 10137–10142 (2008).
- 830 36. Chandras, C. *et al.* CreZOO--the European virtual repository of Cre and other targeted  
831 conditional driver strains. *Database* **2012**, bas029-bas029 (2012).
- 832 37. Smedley, D., Salimova, E. & Rosenthal, N. Cre recombinase resources for conditional  
833 mouse mutagenesis. *Methods* **53**, 411–416 (2011).
- 834 38. Zuckermann, M. *et al.* Somatic CRISPR/Cas9-mediated tumour suppressor disruption  
835 enables versatile brain tumour modelling. *Nat. Commun.* **6**, 7391 (2015).
- 836 39. Chen, F., Rosiene, J., Che, A., Becker, A. & LoTurco, J. Tracking and transforming  
837 neocortical progenitors by CRISPR/Cas9 gene targeting and *p iggyBac* transposase  
838 lineage labeling. *Development* **142**, 3601–3611 (2015).
- 839 40. Cook, P. J. *et al.* Somatic chromosomal engineering identifies BCAN-NTRK1 as a potent  
840 glioma driver and therapeutic target. *Nat. Commun.* **8**, 15987 (2017).
- 841 41. Ghazi, S. O. *et al.* Cell of origin determines tumor phenotype in an oncogenic Ras/p53  
842 knockout transgenic model of high-grade glioma. *J. Neuropathol. Exp. Neurol.* **71**, 729–  
843 40 (2012).
- 844 42. Alcantara Llaguno, S. R. *et al.* Adult Lineage-Restricted CNS Progenitors Specify  
845 Distinct Glioblastoma Subtypes. *Cancer Cell* **28**, 429–440 (2015).

- 846 43. Maddalo, D. *et al.* In vivo engineering of oncogenic chromosomal rearrangements with  
847 the CRISPR/Cas9 system. *Nature* **516**, 423–427 (2014).
- 848 44. Torres, R. *et al.* Engineering human tumour-associated chromosomal translocations with  
849 the RNA-guided CRISPR–Cas9 system. *Nat. Commun.* **5**, (2014).
- 850 45. Blasco, R. B. *et al.* Simple and Rapid In Vivo Generation of Chromosomal  
851 Rearrangements using CRISPR/Cas9 Technology. *Cell Rep.* **9**, 1219–1227 (2014).
- 852 46. Abate, F. *et al.* Pegasus: a comprehensive annotation and prediction tool for detection of  
853 driver gene fusions in cancer. *BMC Syst. Biol.* **8**, 97 (2014).
- 854 47. Drost, J. *et al.* Sequential cancer mutations in cultured human intestinal stem cells. *Nature*  
855 **521**, 43–7 (2015).
- 856 48. Matano, M. *et al.* Modeling colorectal cancer using CRISPR-Cas9–mediated engineering  
857 of human intestinal organoids. *Nat. Med.* **21**, 256–62 (2015).
- 858 49. Xue, W. *et al.* CRISPR-mediated direct mutation of cancer genes in the mouse liver.  
859 *Nature* **514**, 380–384 (2014).
- 860 50. Kleinschmidt-DeMasters, B. K., Aisner, D. L., Birks, D. K. & Foreman, N. K. Epithelioid  
861 GBMs Show a High Percentage of BRAF V600E Mutation. *Am. J. Surg. Pathol.* **37**, 685–  
862 698 (2013).
- 863 51. Tanaka, S. *et al.* Epithelioid glioblastoma arising from pleomorphic xanthoastrocytoma  
864 with the BRAF V600E mutation. *Brain Tumor Pathol.* **31**, 172–176 (2014).
- 865 52. Koike-Yusa, H., Li, Y., Tan, E.-P., Velasco-Herrera, M. D. C. & Yusa, K. Genome-wide  
866 recessive genetic screening in mammalian cells with a lentiviral CRISPR-guide RNA  
867 library. *Nat. Biotechnol.* **32**, 267–273 (2013).
- 868 53. Sanjana, N. E., Shalem, O. & Zhang, F. Improved vectors and genome-wide libraries for  
869 CRISPR screening. *Nat. Methods* **11**, 783–784 (2014).
- 870 54. Wang, L., Jin, Q., Lee, J.-E., Su, I. -h. & Ge, K. Histone H3K27 methyltransferase Ezh2  
871 represses Wnt genes to facilitate adipogenesis. *Proc. Natl. Acad. Sci.* **107**, 7317–7322  
872 (2010).
- 873 55. Weber, J. *et al.* CRISPR/Cas9 somatic multiplex-mutagenesis for high-throughput  
874 functional cancer genomics in mice. *Proc. Natl. Acad. Sci. U. S. A.* **112**, 13982–7 (2015).
- 875 56. Ruiz, S. *et al.* A Genome-wide CRISPR Screen Identifies CDC25A as a Determinant of  
876 Sensitivity to ATR Inhibitors. *Mol. Cell* **62**, 307–13 (2016).

- 877 57. Carro, A., Perez-Martinez, M., Soriano, J., Pisano, D. G. & Megias, D. iMSRC:  
878 converting a standard automated microscope into an intelligent screening platform. *Sci.*  
879 *Rep.* **5**, 10502 (2015).
- 880 58. Rodriguez-Perales, S. *et al.* Truncated RUNX1 protein generated by a novel  
881 t(1;21)(p32;q22) chromosomal translocation impairs the proliferation and differentiation  
882 of human hematopoietic progenitors. *Oncogene* **35**, 125–34 (2016).
- 883 59. Bowman, R. L., Wang, Q., Carro, A., Verhaak, R. G. W. & Squatrito, M. GlioVis data  
884 portal for visualization and analysis of brain tumor expression datasets. *Neuro. Oncol.* **19**,  
885 139–141 (2017).
- 886 60. R Core Team. R: A language and environment for statistical computing. *R Foundation for*  
887 *Statistical Computing, Vienna, Austria.* (2016). Available at: <https://www.r-project.org/>.  
888  
889

890 **Figure legends**

891 **Figure 1: Cas9 expression in the brain of TVA/Cas9 mouse strains.**

892 (a) and (b) Immunofluorescence staining performed on brain sections of 4 weeks old *Ntv-a; Nes-*  
893 *Cre; LSL-Cas9* and *Gtv-a; hGFAP-Cre; LSL-Cas9* mice with antibody against EGFP (Cas9),  
894 NESTIN and GFAP. CAS9 is widely expressed in the whole brain and co-localize with NESTIN  
895 and GFAP in the subventricular zone. *Left panels*: whole brain section; *right panels*: higher  
896 magnification of the left panel inset. Scale bars: left panels, 500  $\mu\text{m}$ ; right panels 100  $\mu\text{m}$ . LV,  
897 lateral ventricle.

898

899 **Figure 2: Tumor suppressor genes knockout by RCAS-gRNA plasmids induce high-grade-**  
900 **gliomas.**

901 (a) Schematic illustration of the RCAS-gRNA plasmids. (b) *In vitro* validation of the RCAS-  
902 gRNA against *Trp53*, *Pten*, *Cdkn2a* and a non-targeting control (Ctrl). Western blot analysis,  
903 using the indicated antibodies, on whole cell extracts from NIH3T3 TVA-Cas9 fibroblasts and  
904 *Ntv-a; LSL-Cas9* neural stem cells (NSCs) transduced with pMSCVhygro-CRE (NSC TVA-  
905 Cas9). To induce TP53 expression, the cells were collected 24h after exposure to ionizing  
906 radiation (10 Gy).

907 (c) Table summarizing the injections performed in the *Ntv-a; Nes-Cre; LSL-Cas9* and *Gtv-a;*  
908 *hGFAP-Cre; LSL-Cas9* pups and adult mice. Co-injection of RCAS-PDGFB and the RCAS-  
909 gRNA against different tumor suppressor genes accelerate tumor formation, increases the tumor  
910 penetrance and the frequency of high-grade gliomas. (d) Hematoxylin and eosin (H&E) and  
911 immunohistochemical stainings (IHCs), using the indicated antibodies, of representative RCAS-  
912 PDGFB/gRNA tumors. To note PTEN expression in the normal vasculature but not in the tumor  
913 cells of the RCAS-PDGFB + RCAS-Pten-gRNA tumor. Insets show higher magnification  
914 images. Scale bars: H&E 100  $\mu\text{m}$ ; IHCs 50  $\mu\text{m}$ .

915

916 **Figure 3: Ubiquitous Cas9 expression in TVA/Cas9 adult mice does not induce a robust**  
917 **immune response.**

918 (a) *Left panels*: Flow cytometry analysis for the specified markers in blood and spleen of *Ntv-a;*  
919 *LSL-Cas9; hUBC-CreERT2* mice of the indicated genotype. Four weeks old mice were treated  
920 with tamoxifen in the food for 5 consecutive weeks. *Right panels*: representative flow cytometry

921 plots, with the gating strategy used for the analysis. **(b) Left panels:** Flow cytometry analysis for  
922 lymphocytes, macrophages and microglia of the brain of the mice in (a). *Right panels:*  
923 representative flow cytometry plots, with the gating strategy used for the analysis. **(c)** Table  
924 summarizing the injections performed in the *Ntv-a; LSL-Cas9; hUBC-CreERT2* adult mice. Mice  
925 injected with RCAS-PDGFB + RCAS-Trp53-gRNA and treated with tamoxifen to induce Cas9  
926 expression, develop high-grade gliomas. **(d)** H&E and Cas9 IHCs of RCAS-PDGFB + RCAS-  
927 Trp53-gRNA tumors for the indicated treatment. High-grade glioma features and CAS9  
928 expression are present only in the tamoxifen-treated mice. Scale bars: H&E 100  $\mu\text{m}$ ; IHCs 50  
929  $\mu\text{m}$ .

930

931 **Figure 4: *Bcan-Ntrk1* gene fusion drives high-grade glioma formation.**

932 **(a)** Schematic representation of the *Bcan* and *Ntrk1* gene loci and the *Bcan-Ntrk1* gene fusion.  
933 Indicated are the gRNAs targeting both genes and the primers used for the PCR amplification of  
934 the indicated genomic regions. **(b) Top panel:** RCAS-gRNA-pair vector expressing the *Bcan* and  
935 *Ntrk1* gRNAs. *Bottom panels:* PCRs were performed with the specified primers on genomic  
936 DNA extracted from the *p53-null* TVA-Cas9 NSCs transduced with the indicated gRNAs. The  
937 PCR band for the *Bcan-Ntrk1*gRNA infected cells was sub-cloned and analyzed by Sanger  
938 sequencing. The sequences of four independent clones and a representative chromatogram are  
939 shown. **(c) Left panel:** Diagram of fluorescence *in situ* hybridization (FISH) probe design. BAC  
940 clone BMQ-437D10 (red) is located within the deleted region and BMQ-386N22 (green) is used  
941 as a control of chromosome 3. Mouse BACs are represented as green and red bars. *Right panel:*  
942 Representative FISH results using the two-color probe designed to detect the *Ntrk1-Bcan*  
943 intergenic microdeletion. The control green signal was used to count the number of  
944 chromosomes 3. The loss of the red signals indicates the microdeletions. Scale bar: 5  $\mu\text{m}$ . **(d)**  
945 *Top panel:* Schematic representation of *Bcan-Ntrk1* fusion transcript. *Bottom panels:* *(left)* RT-  
946 PCRs were performed on the mRNA from the *p53-null* TVA-Cas9 NSCs transduced with the  
947 indicated gRNAs, using the *Bcan-Fw* and *Ntrk1-Rev* primers; *(middle)* the PCR band was sub-  
948 cloned and the sequences of 2 independent clones and a representative chromatogram are shown;  
949 *(right)* quantitative real-time PCR (qPCR), with the *Ntrk1\_3'-Fw* and *Ntrk1\_3'-Rev* primers,  
950 showing the upregulation of the *Ntrk1* mRNA in the cells expressing the *Bcan-Ntrk1* fusion. **(e)**  
951 H&E and IHCs using the indicated antibodies. White arrows point to mitotic figures. Scale bars:



952 H&E 100  $\mu$ m; IHCs 50  $\mu$ m. **(f)** Cell proliferation assay performed on *p53-null* TVA-Cas9 NSCs  
953 and Bcan-Ntrk1 tumorspheres exposed for 96h to increasing doses of Entrectinib, a pan-Trk  
954 inhibitor. **(g)** Entrectinib treatment in Bcan-Ntrk1 tumorspheres induces an increase in apoptosis,  
955 as measured by percentage of sub-G1 population in cell fixed and stained with propidium iodide.  
956

957 **Figure 5: Generation of the *Myb-Qk* chromosomal translocation.**

958 **(a)** Schematic representation of the *Myb* and *Qk* gene loci and the *Myb-Qk* gene fusion. Indicated  
959 are the gRNAs targeting both genes and the primers used for the PCR amplification of the  
960 indicated genomic regions. **(b) Top panel:** RCAS-gRNA-pair vector expressing the Myb and Qk  
961 gRNAs. **Bottom panels:** PCRs were performed with the specified primers on genomic DNA  
962 extracted from the *p53-null* TVA-Cas9 NSCs transduced with the indicated gRNAs. The PCR  
963 band for the Myb-Qk gRNA infected cells was sub-cloned and analyzed by Sanger sequencing.  
964 The sequences of three independent clones and a representative chromatogram are shown. **(c)**  
965 **Top panel:** Schematic representation of *Myb-Qk* fusion transcript. **Bottom panels: (left)** RT-PCRs  
966 were performed on the mRNA from the *p53-null* TVA-Cas9 NSCs transduced with the indicated  
967 gRNAs, using the Myb-Fw and Qk-Rev primers; **(right)** the PCR band was sub-cloned and the  
968 sequences of 2 independent clones and a representative chromatogram are shown. **(d)** qPCR  
969 analysis shows the upregulation of Myb-activated genes in the *p53-null* TVA-Cas9 NSCs  
970 expressing the *Myb-Qk* fusion. **(e)** *p53-null* TVA-Cas9 NSCs transduced with the Myb and Qk  
971 gRNAs, but not Ctrl gRNA, are able to growth in soft agar.

972

973 **Figure 6: Glioma formation induced by *Braf*<sup>V637E</sup>**

974 **(a)** Schematic representation of the plasmid carrying the Braf gRNA and the Braf<sup>V637E</sup> Homology-  
975 Directed-Repair (HDR) donor. **(b)** H&E and IHCs using the indicated antibodies. White arrows  
976 point to mitotic figures. Scale bars: H&E 100  $\mu$ m; IHCs 50  $\mu$ m. **(c)** IHCs using an anti-BRAF  
977 V600E antibody on two Braf<sup>V637E</sup> mutant tumors. Contralateral normal brain was used as a  
978 negative control. **(d)** Cell proliferation assay performed on *p53-null* TVA-Cas9 NSCs and  
979 Braf<sup>V637E</sup> tumorspheres exposed for 96h to increasing doses of Dabrafenib. **(e)** Western blot  
980 analysis using the specified antibodies on *p53-null* TVA-Cas9 NSCs and Braf<sup>V637E</sup> tumorspheres  
981 grown for 24h in absence of growth factors and then treated with Dabrafenib (200nM) for the  
982 indicated time.

Barbara Oldrini, Álvaro Curiel García et al.

983

984

a

EGFP (Cas9) / NESTIN / Dapi

NESTIN / Dapi

EGFP (Cas9) / Dapi

EGFP (Cas9) / NESTIN

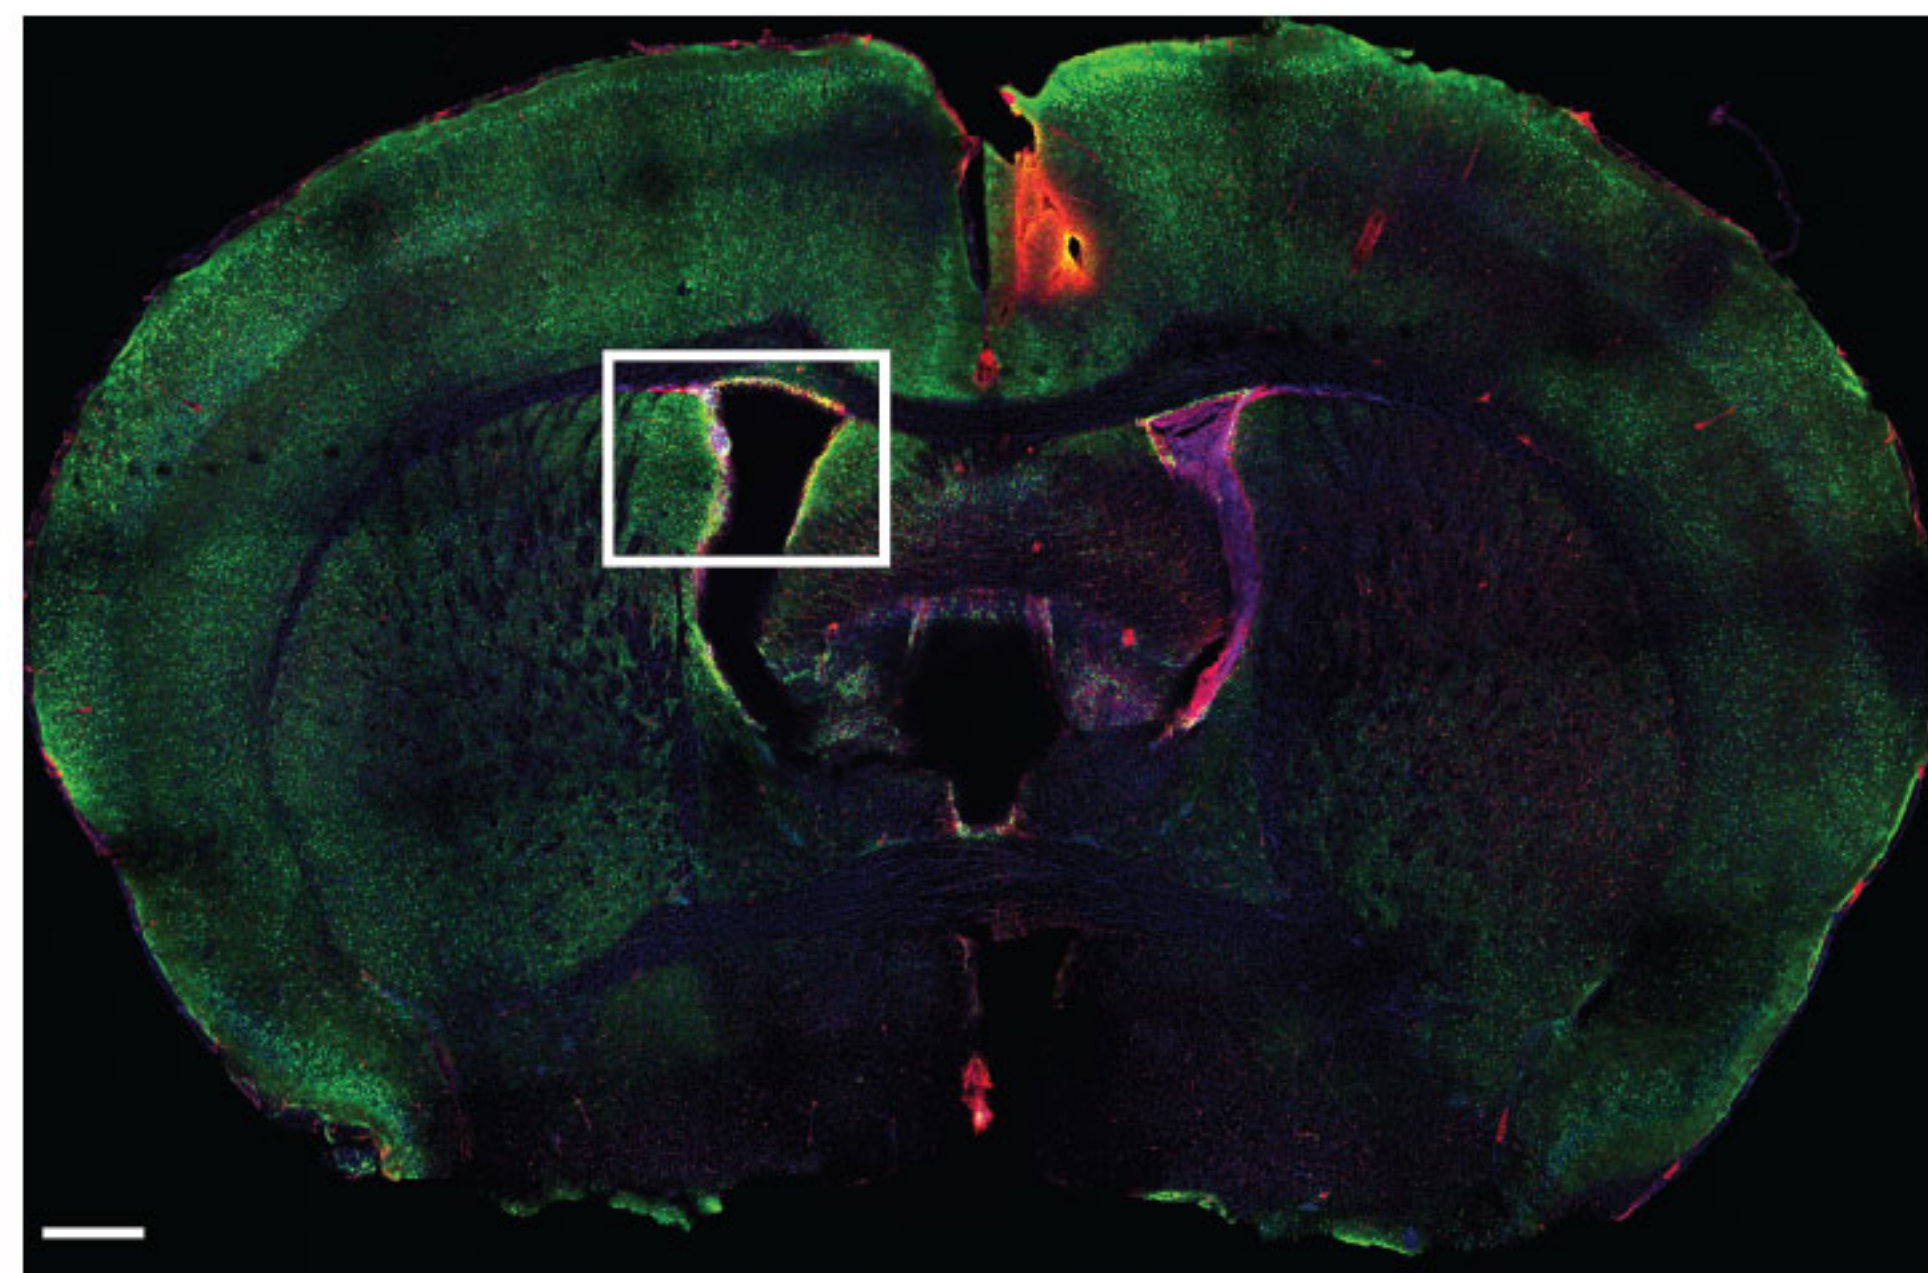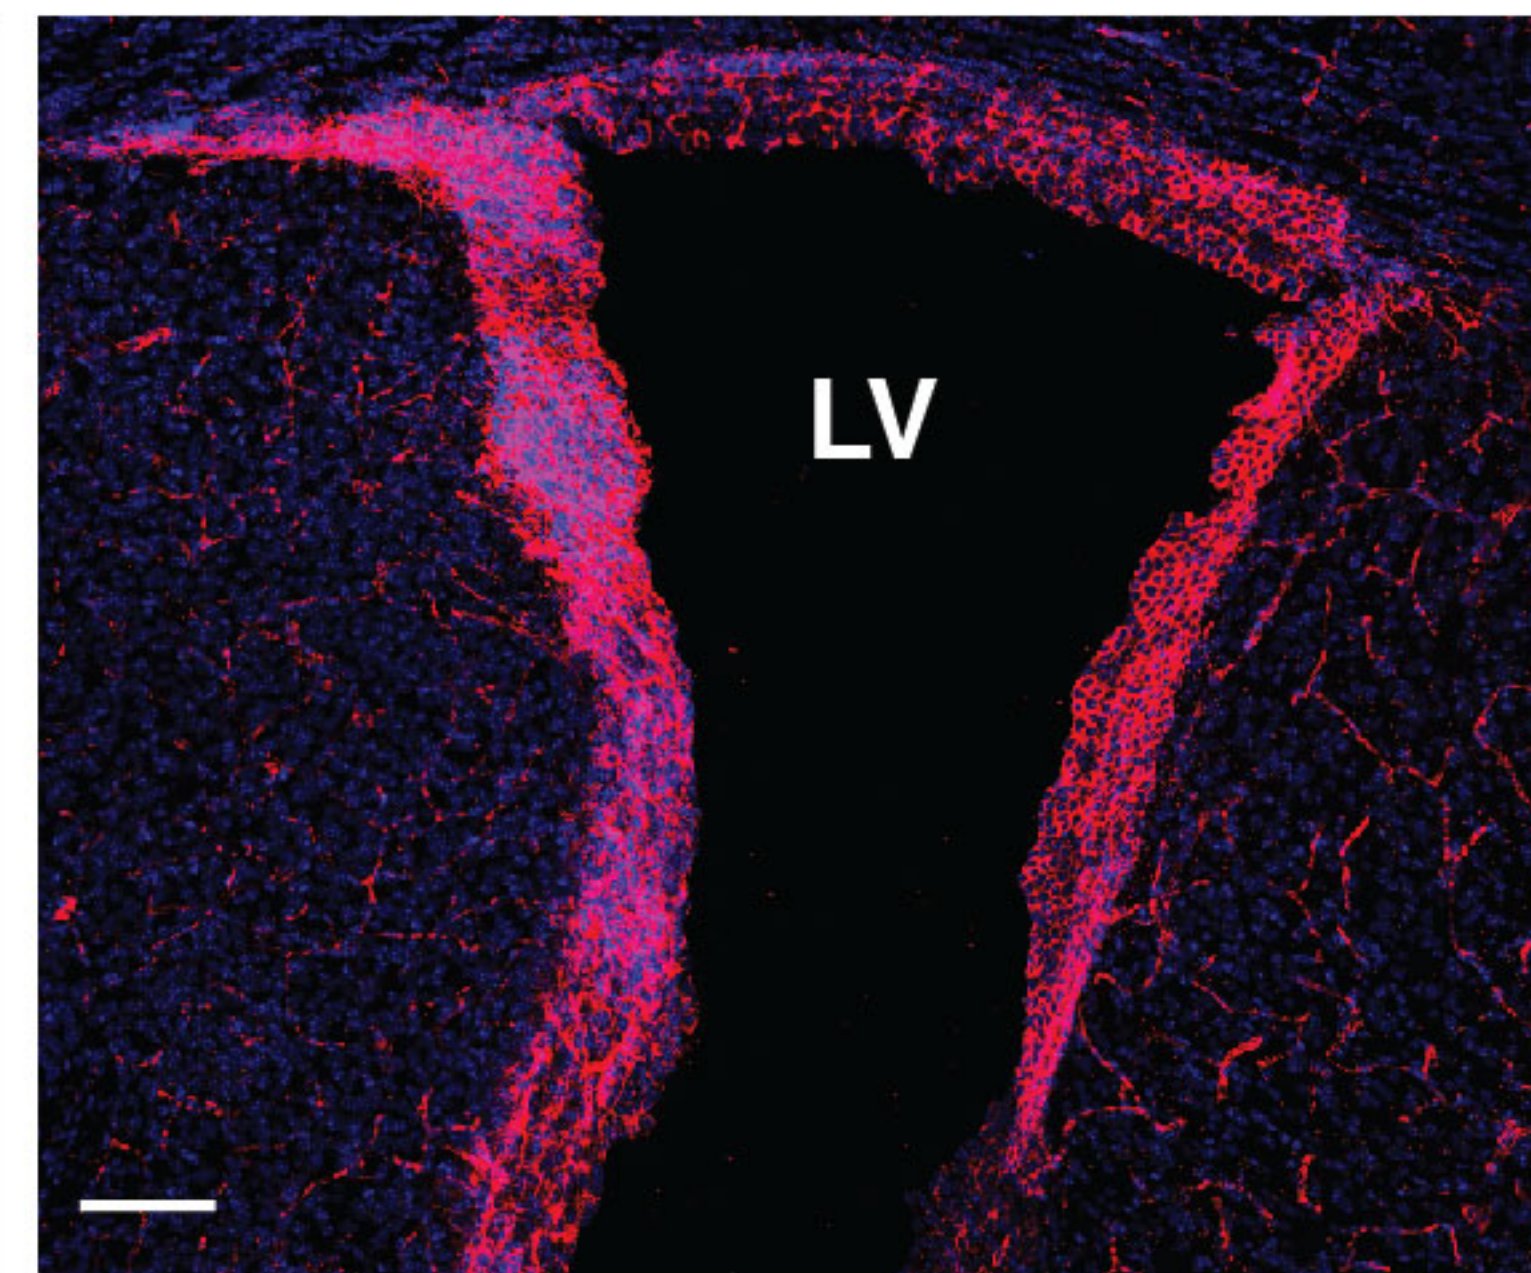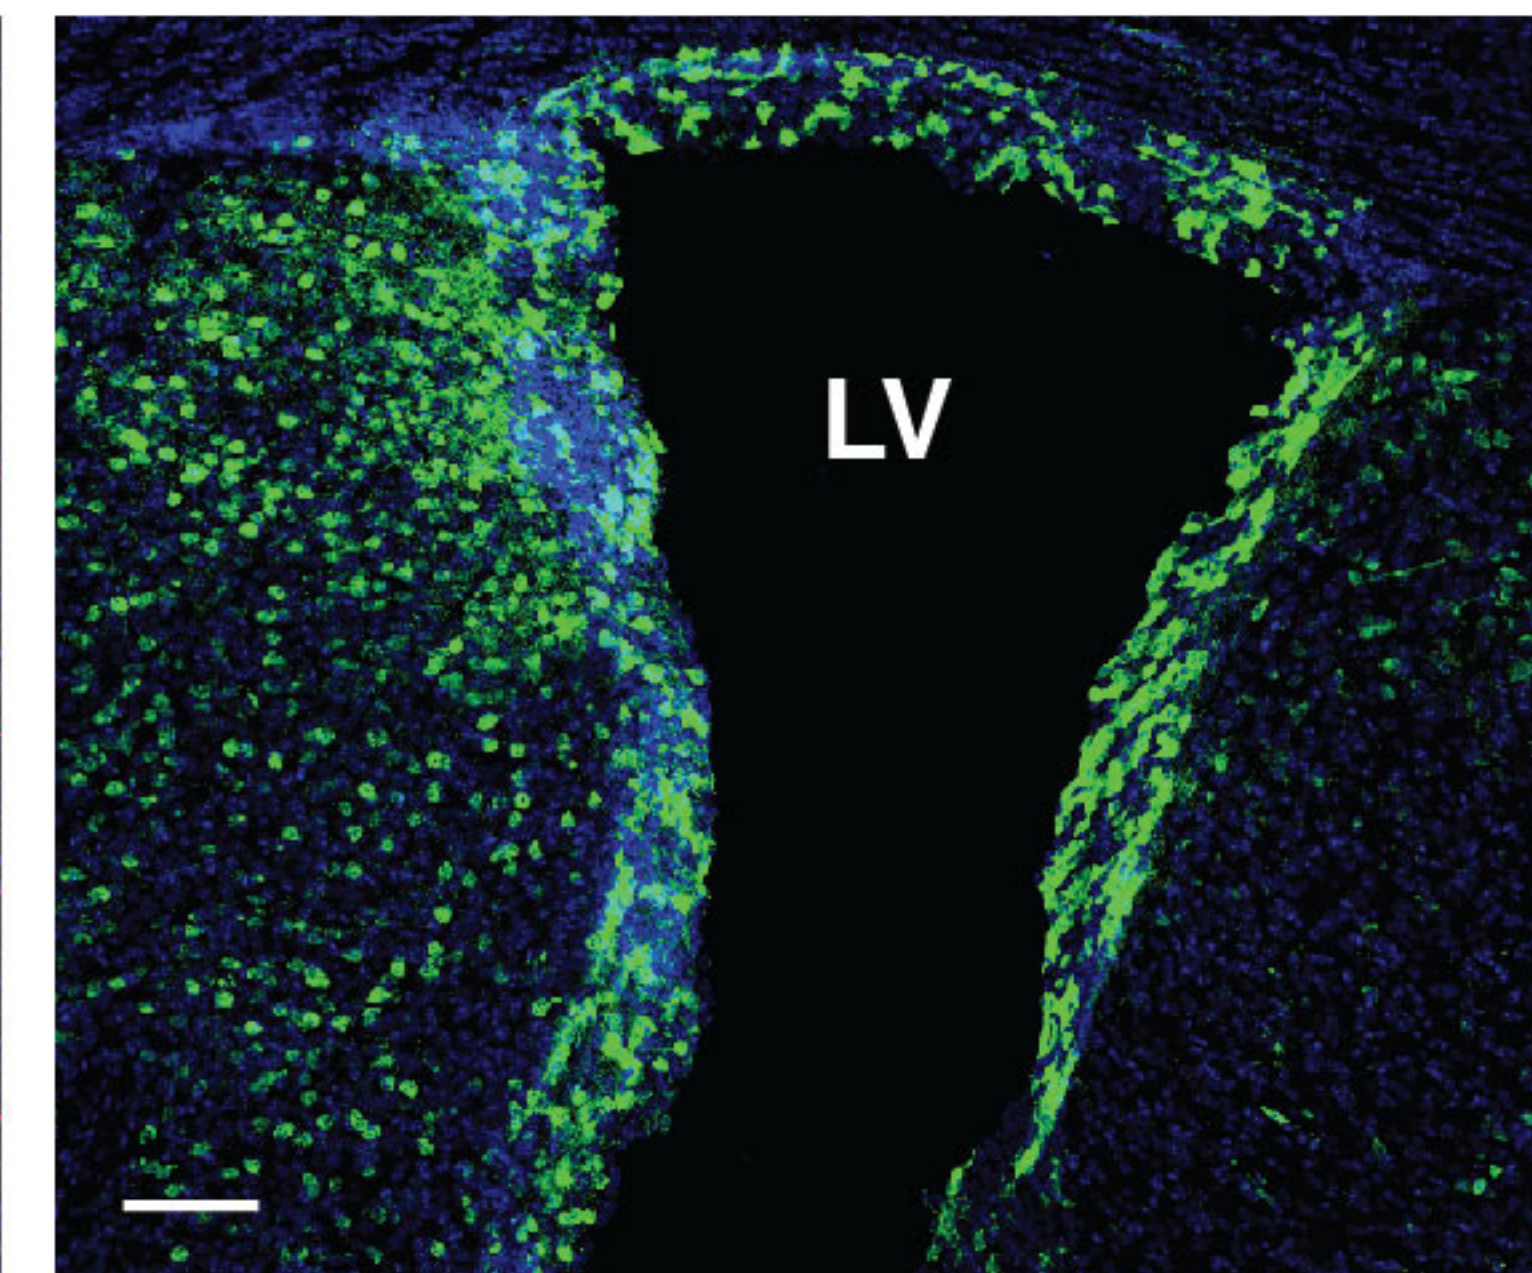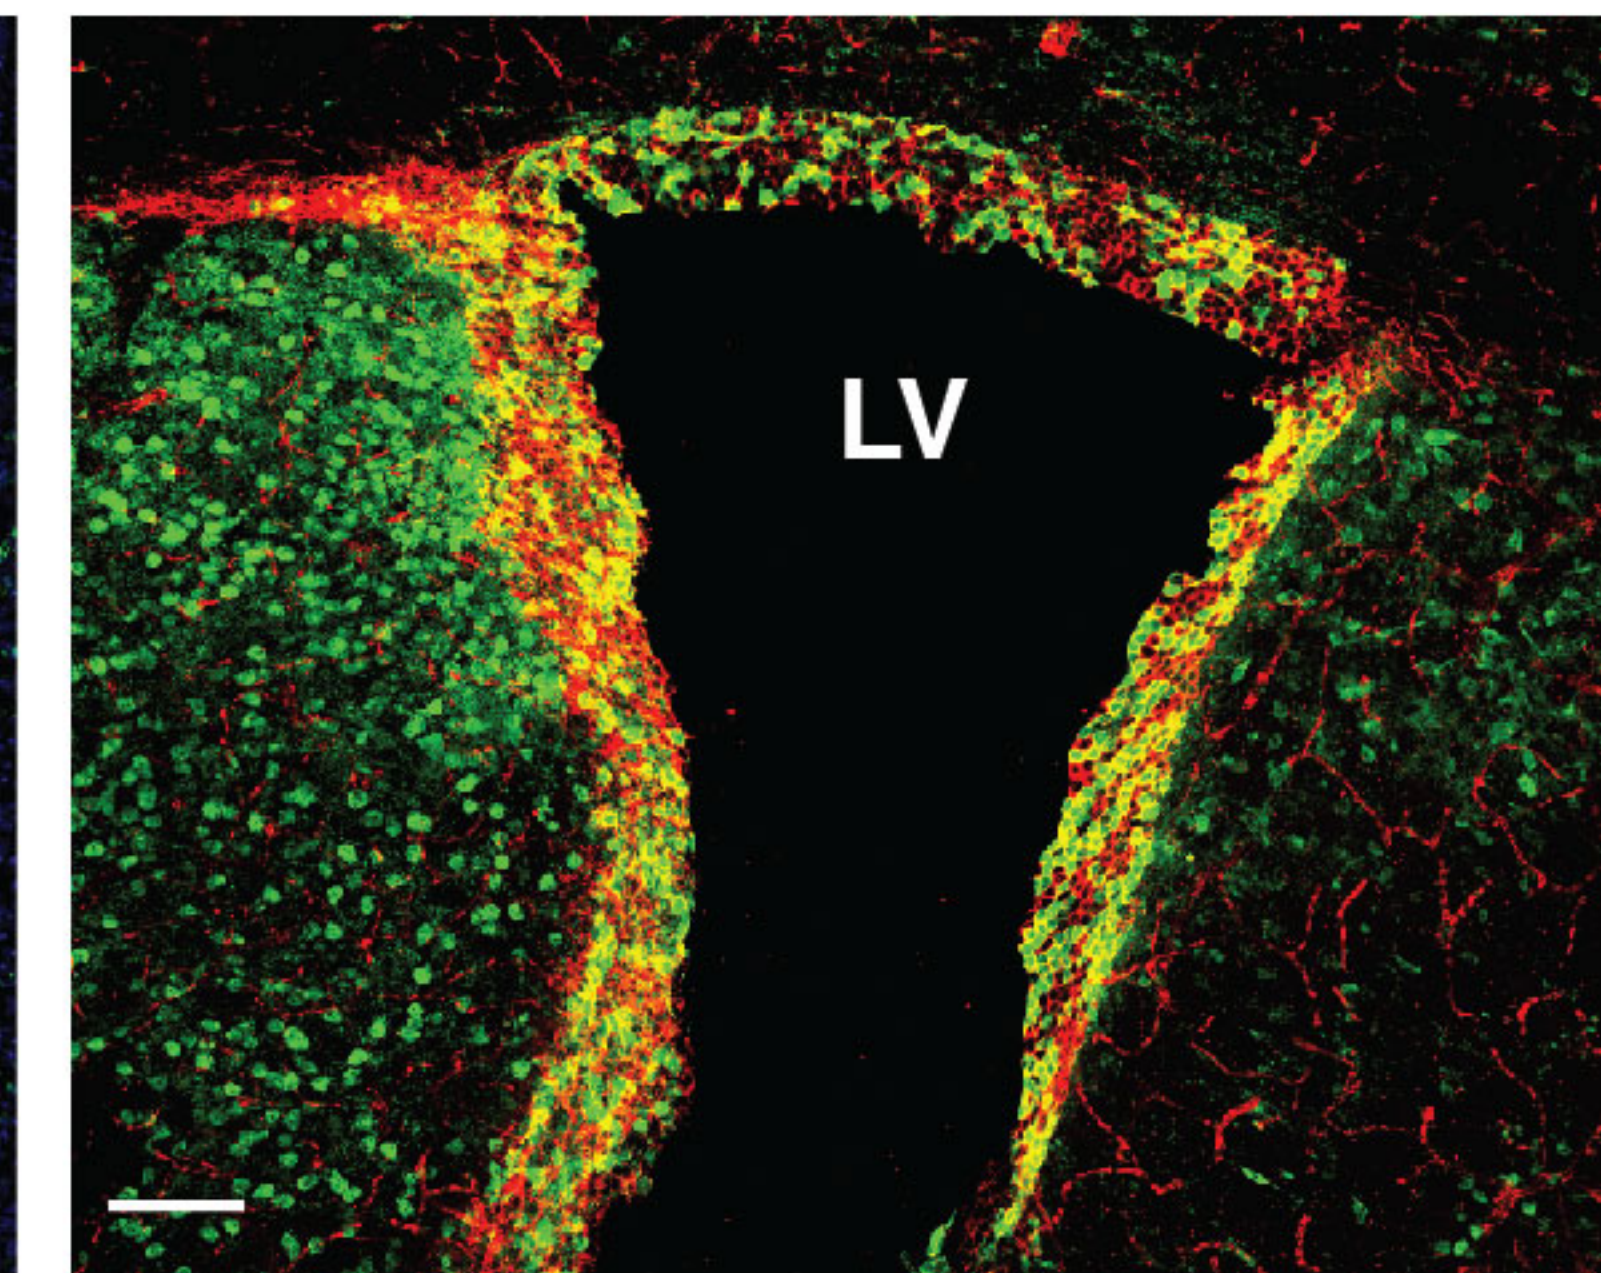

*Ntv-a; Nes-Cre; LSL-Cas9*

b

EGFP (Cas9) / GFAP / Dapi

GFAP / Dapi

EGFP (Cas9) / Dapi

EGFP (Cas9) / GFAP

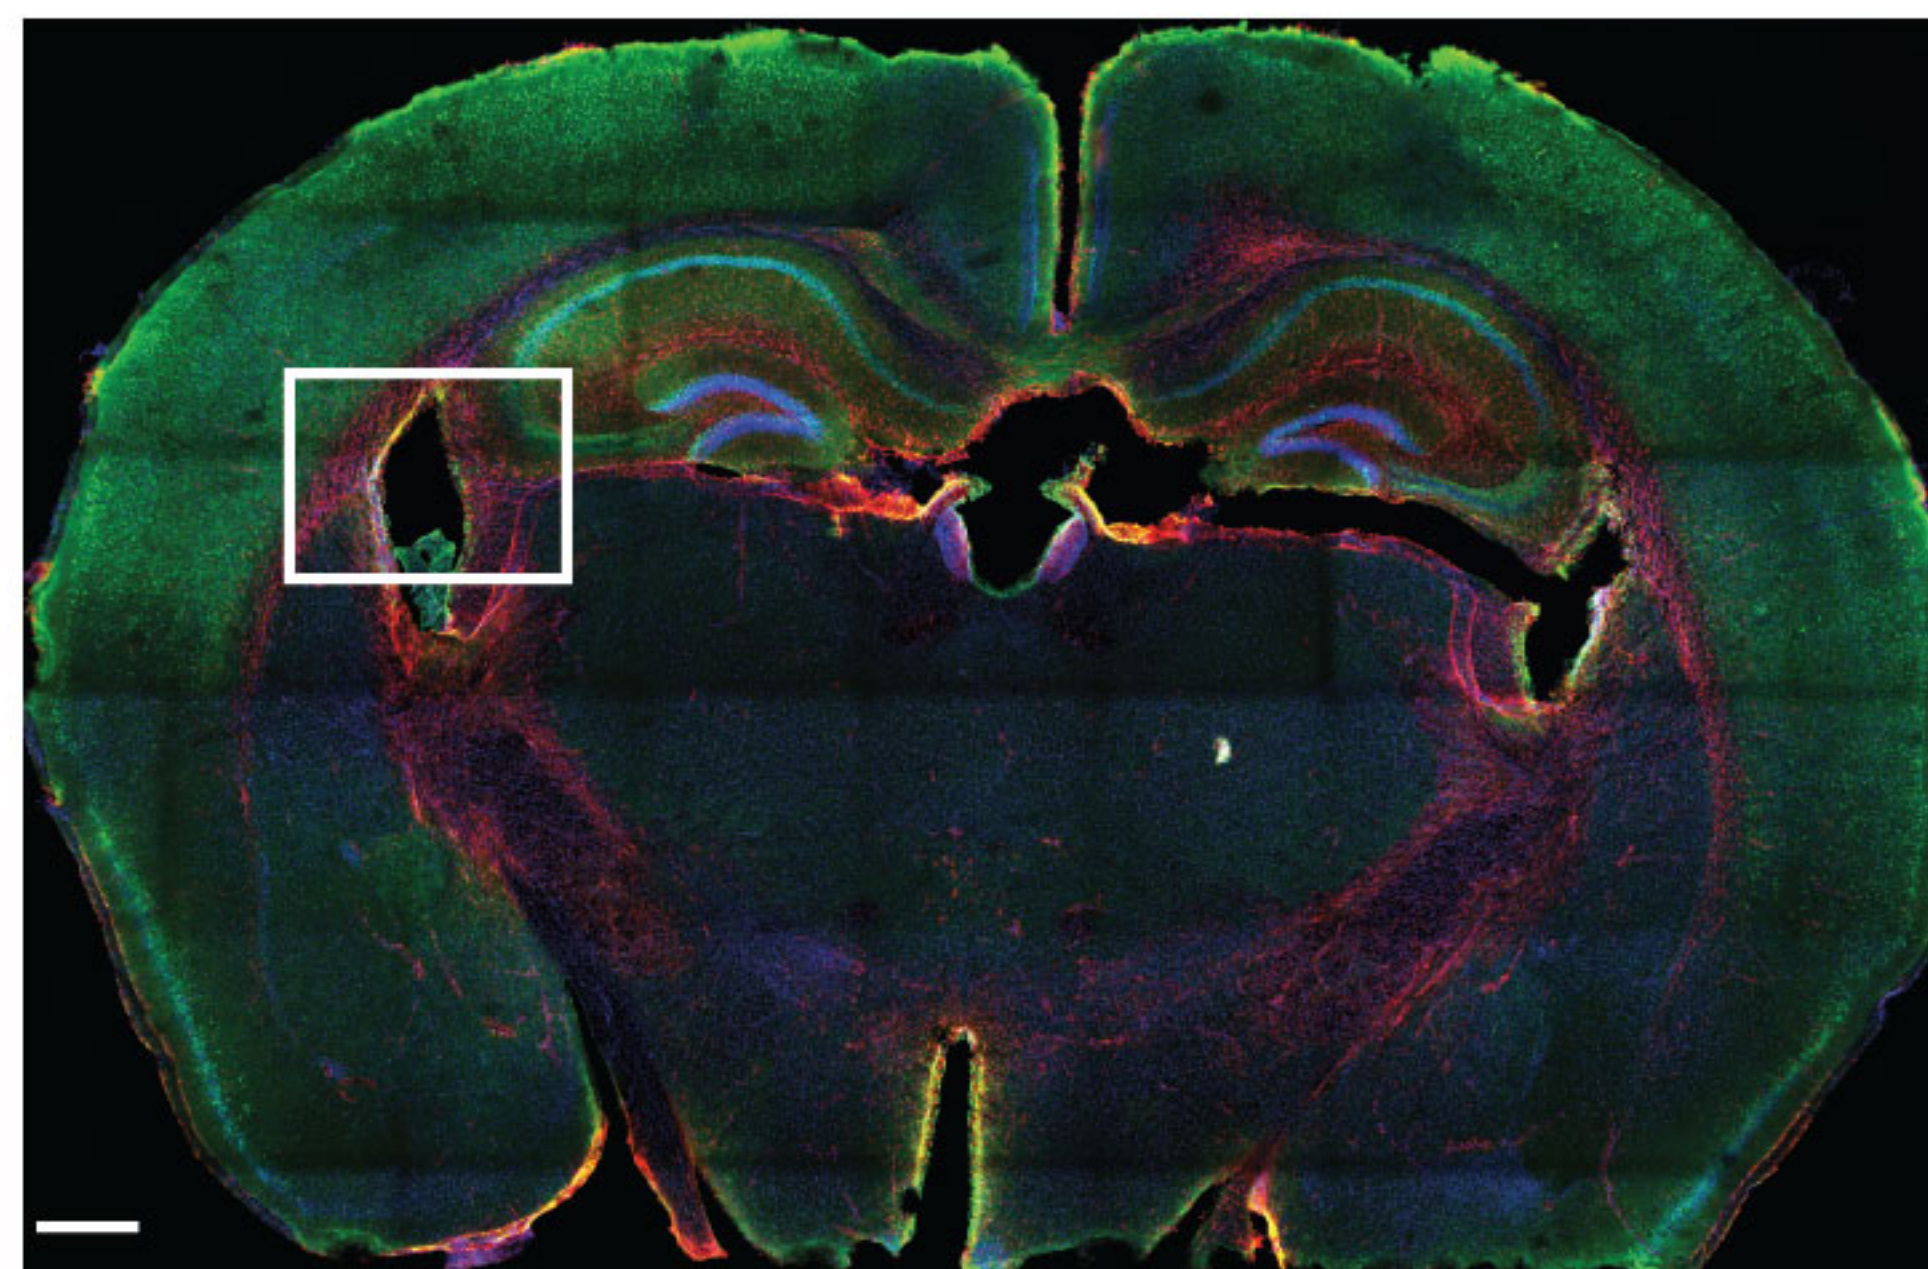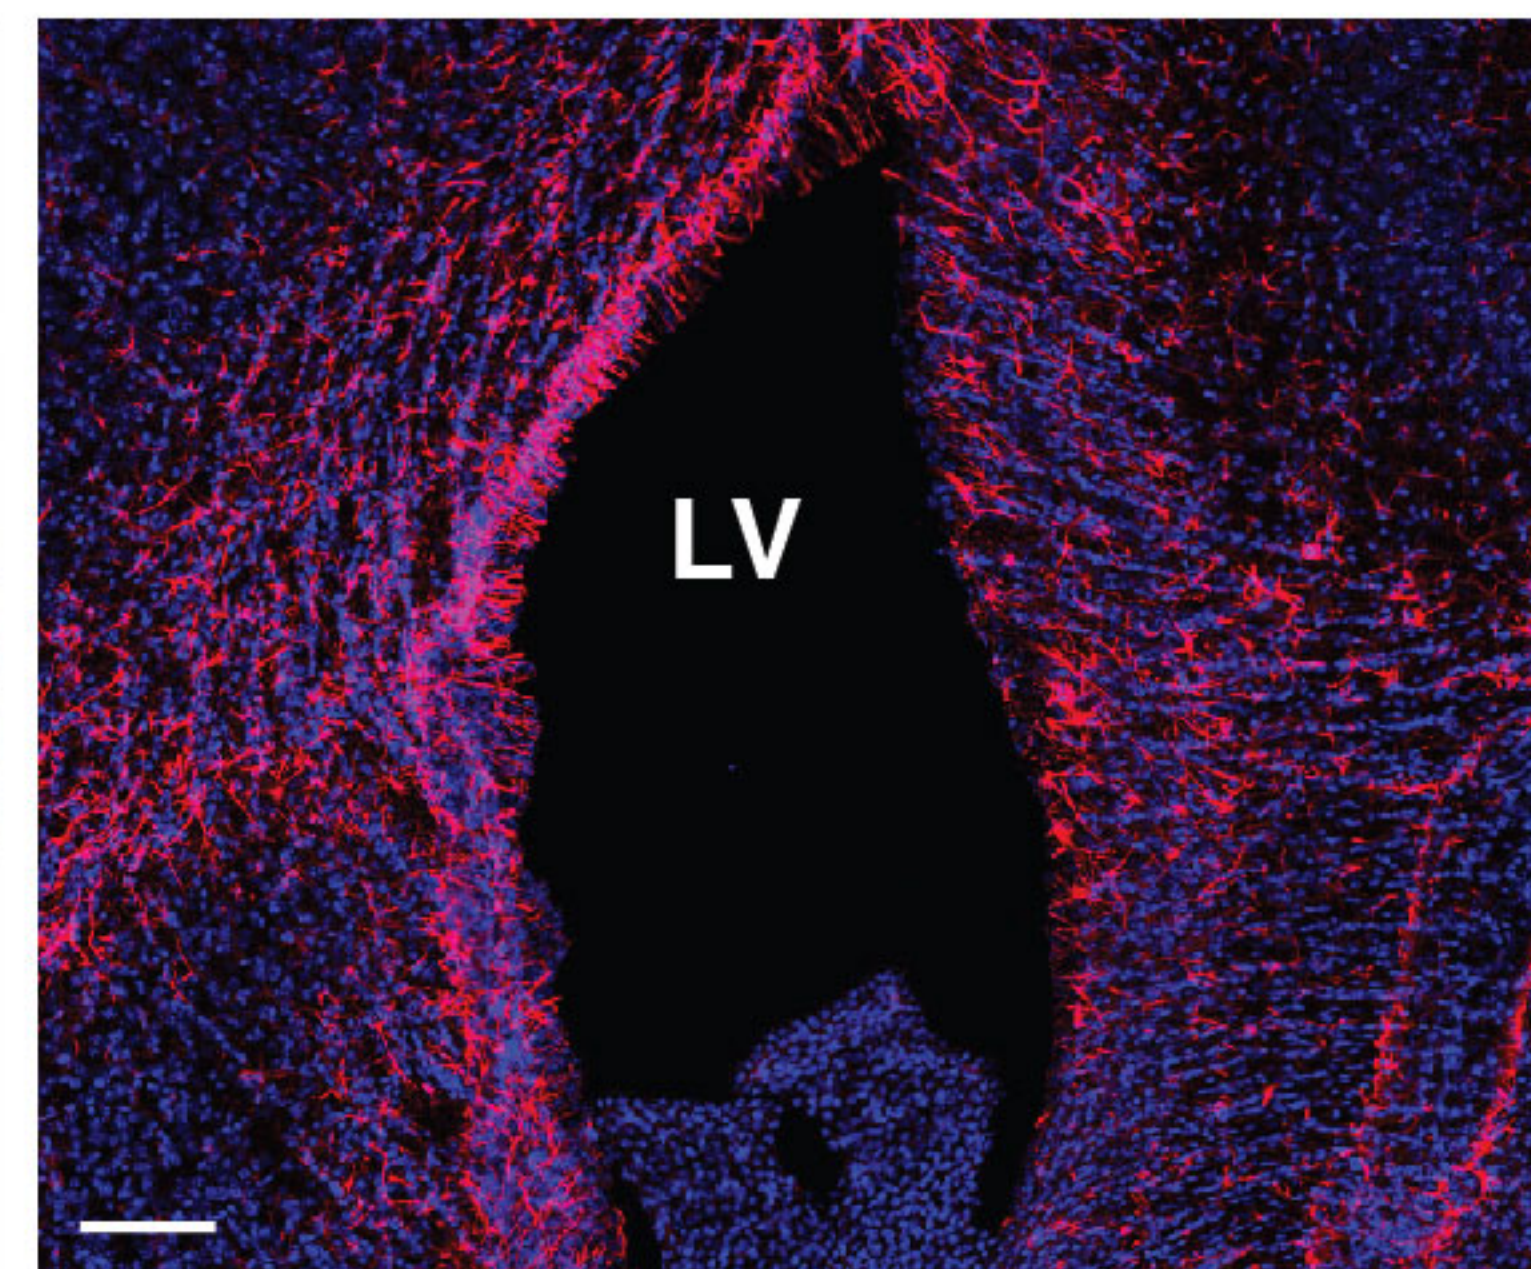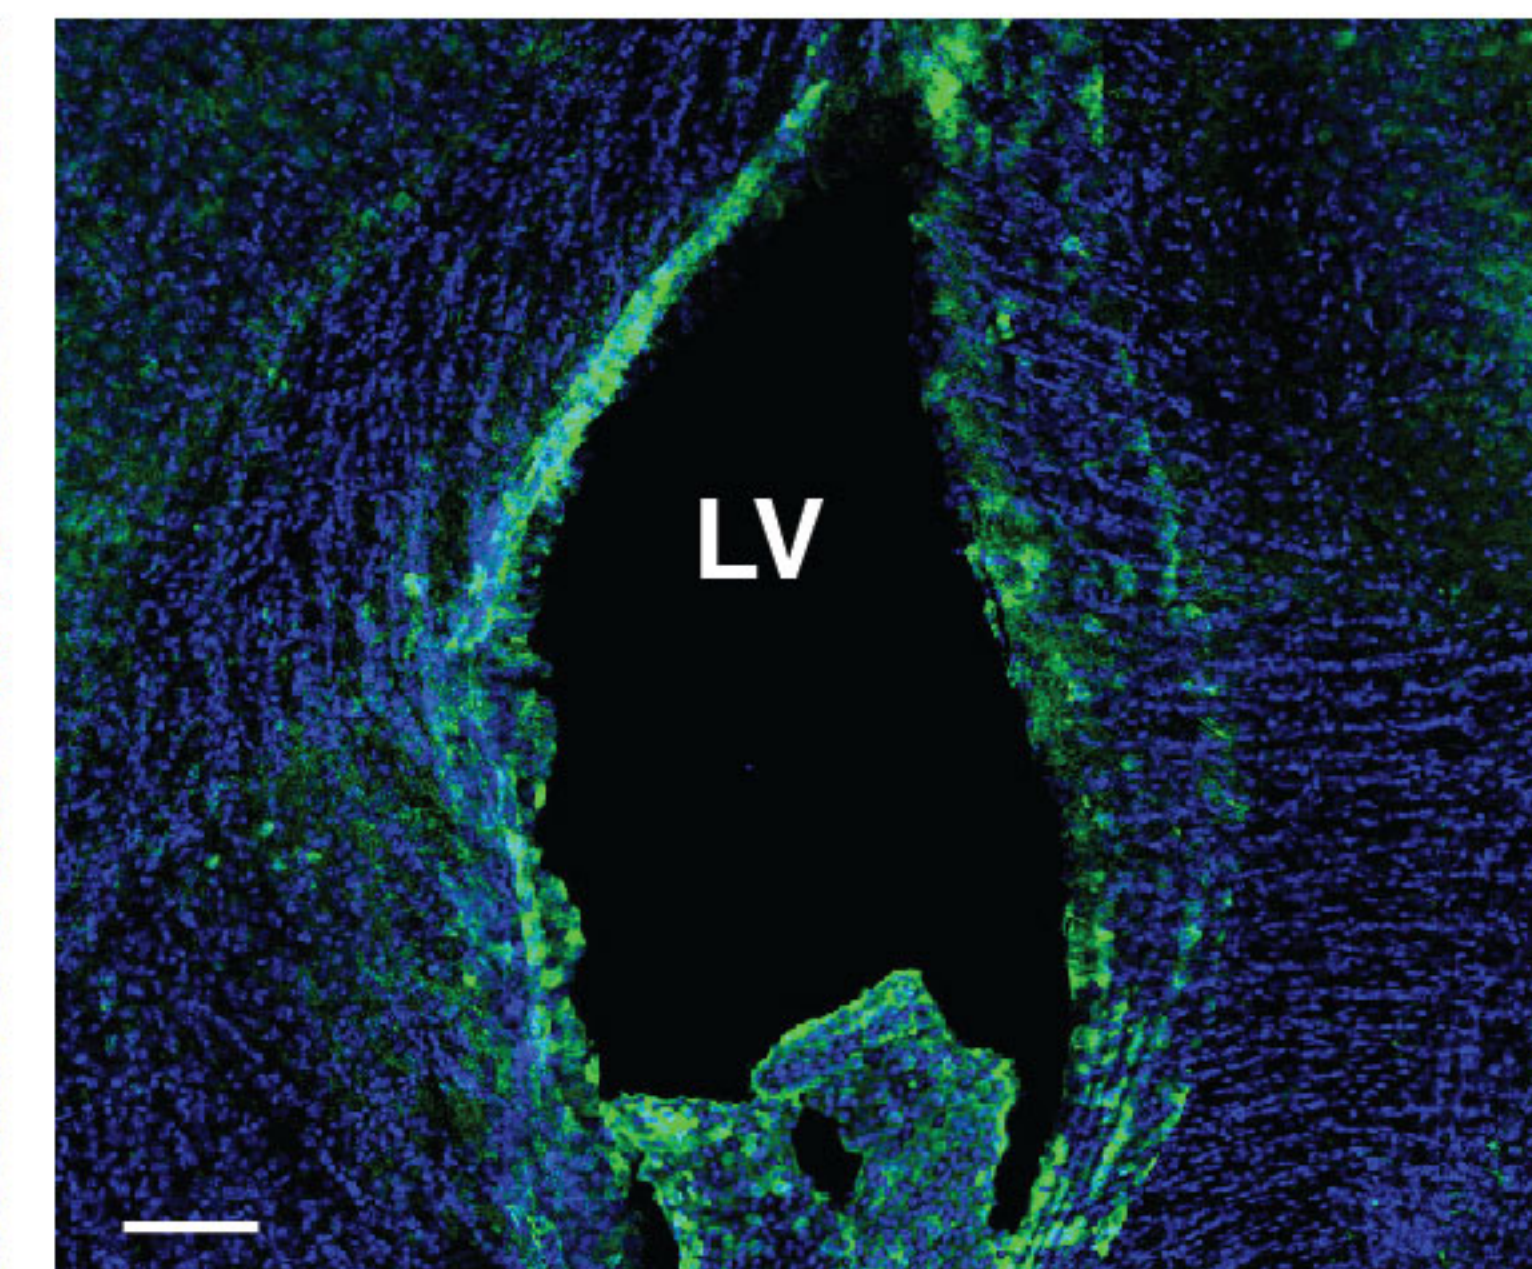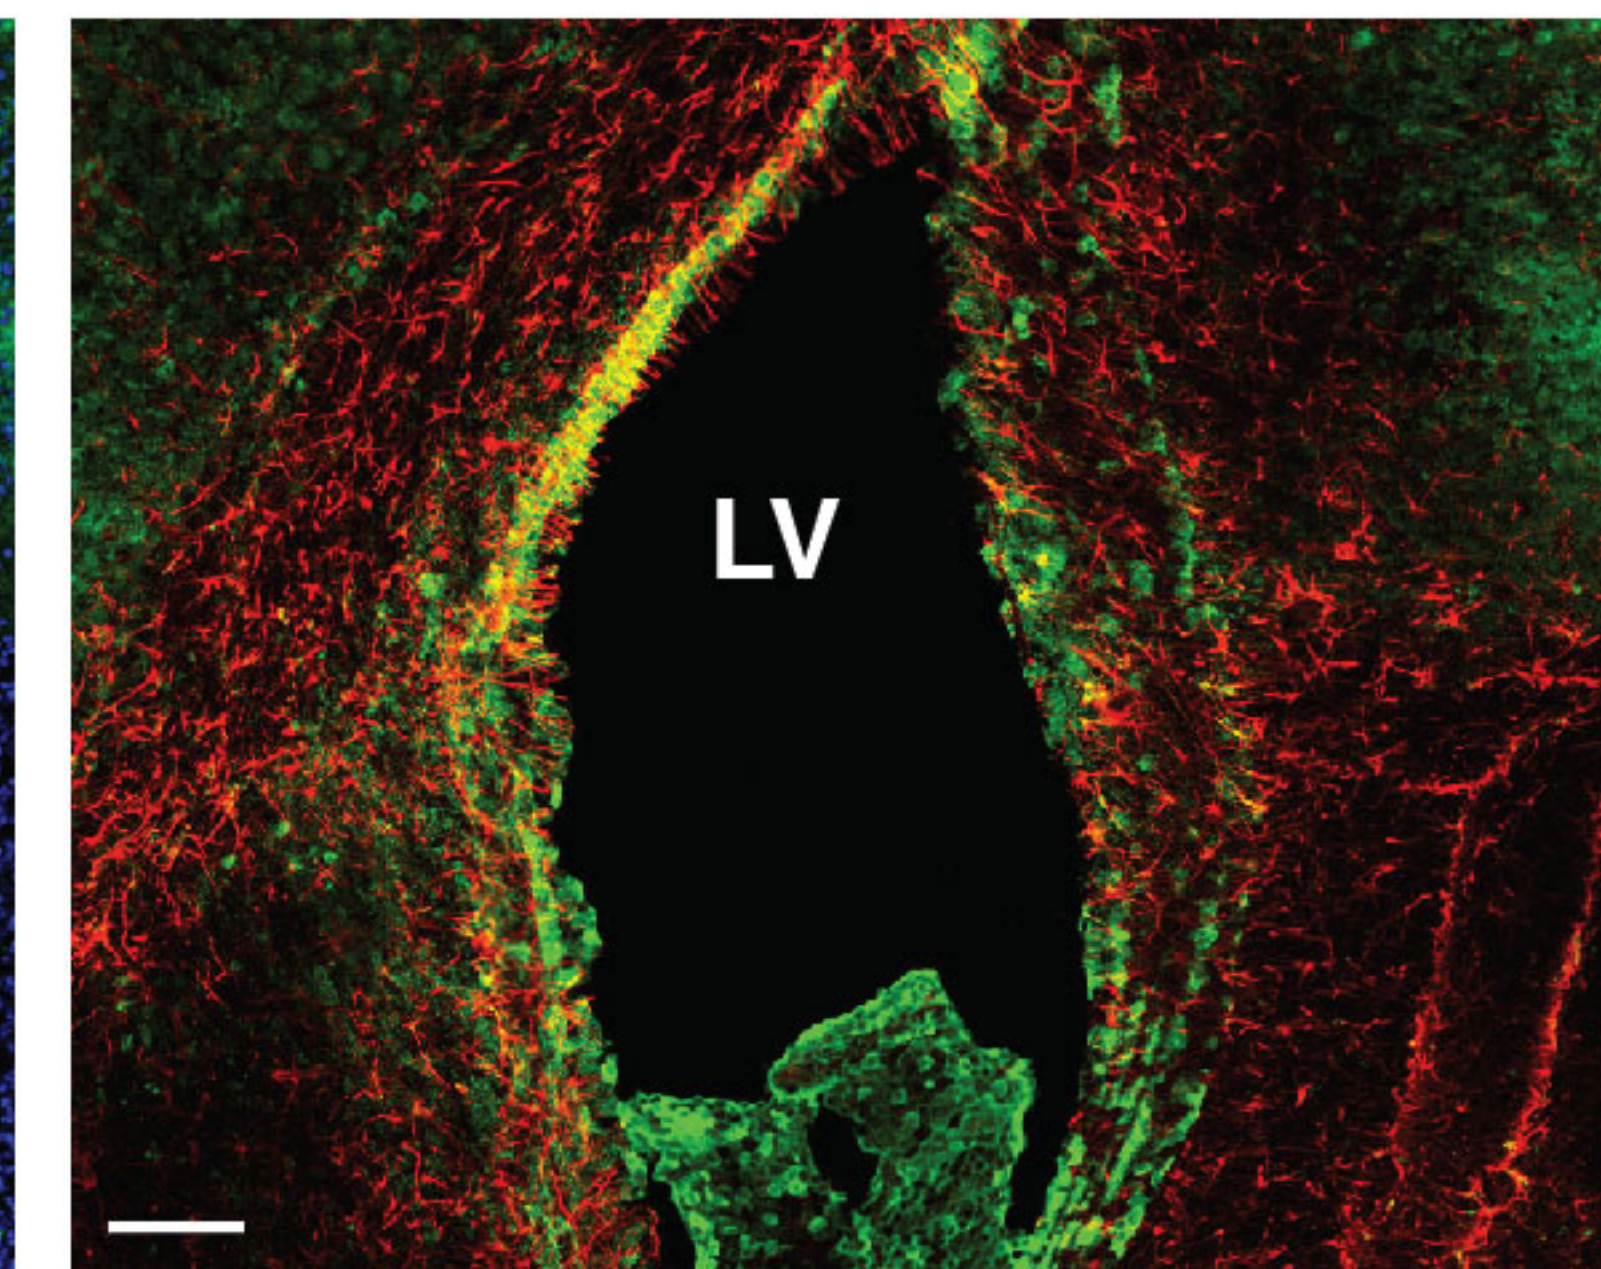

*Gtv-a; hGFAP-Cre; LSL-Cas9*

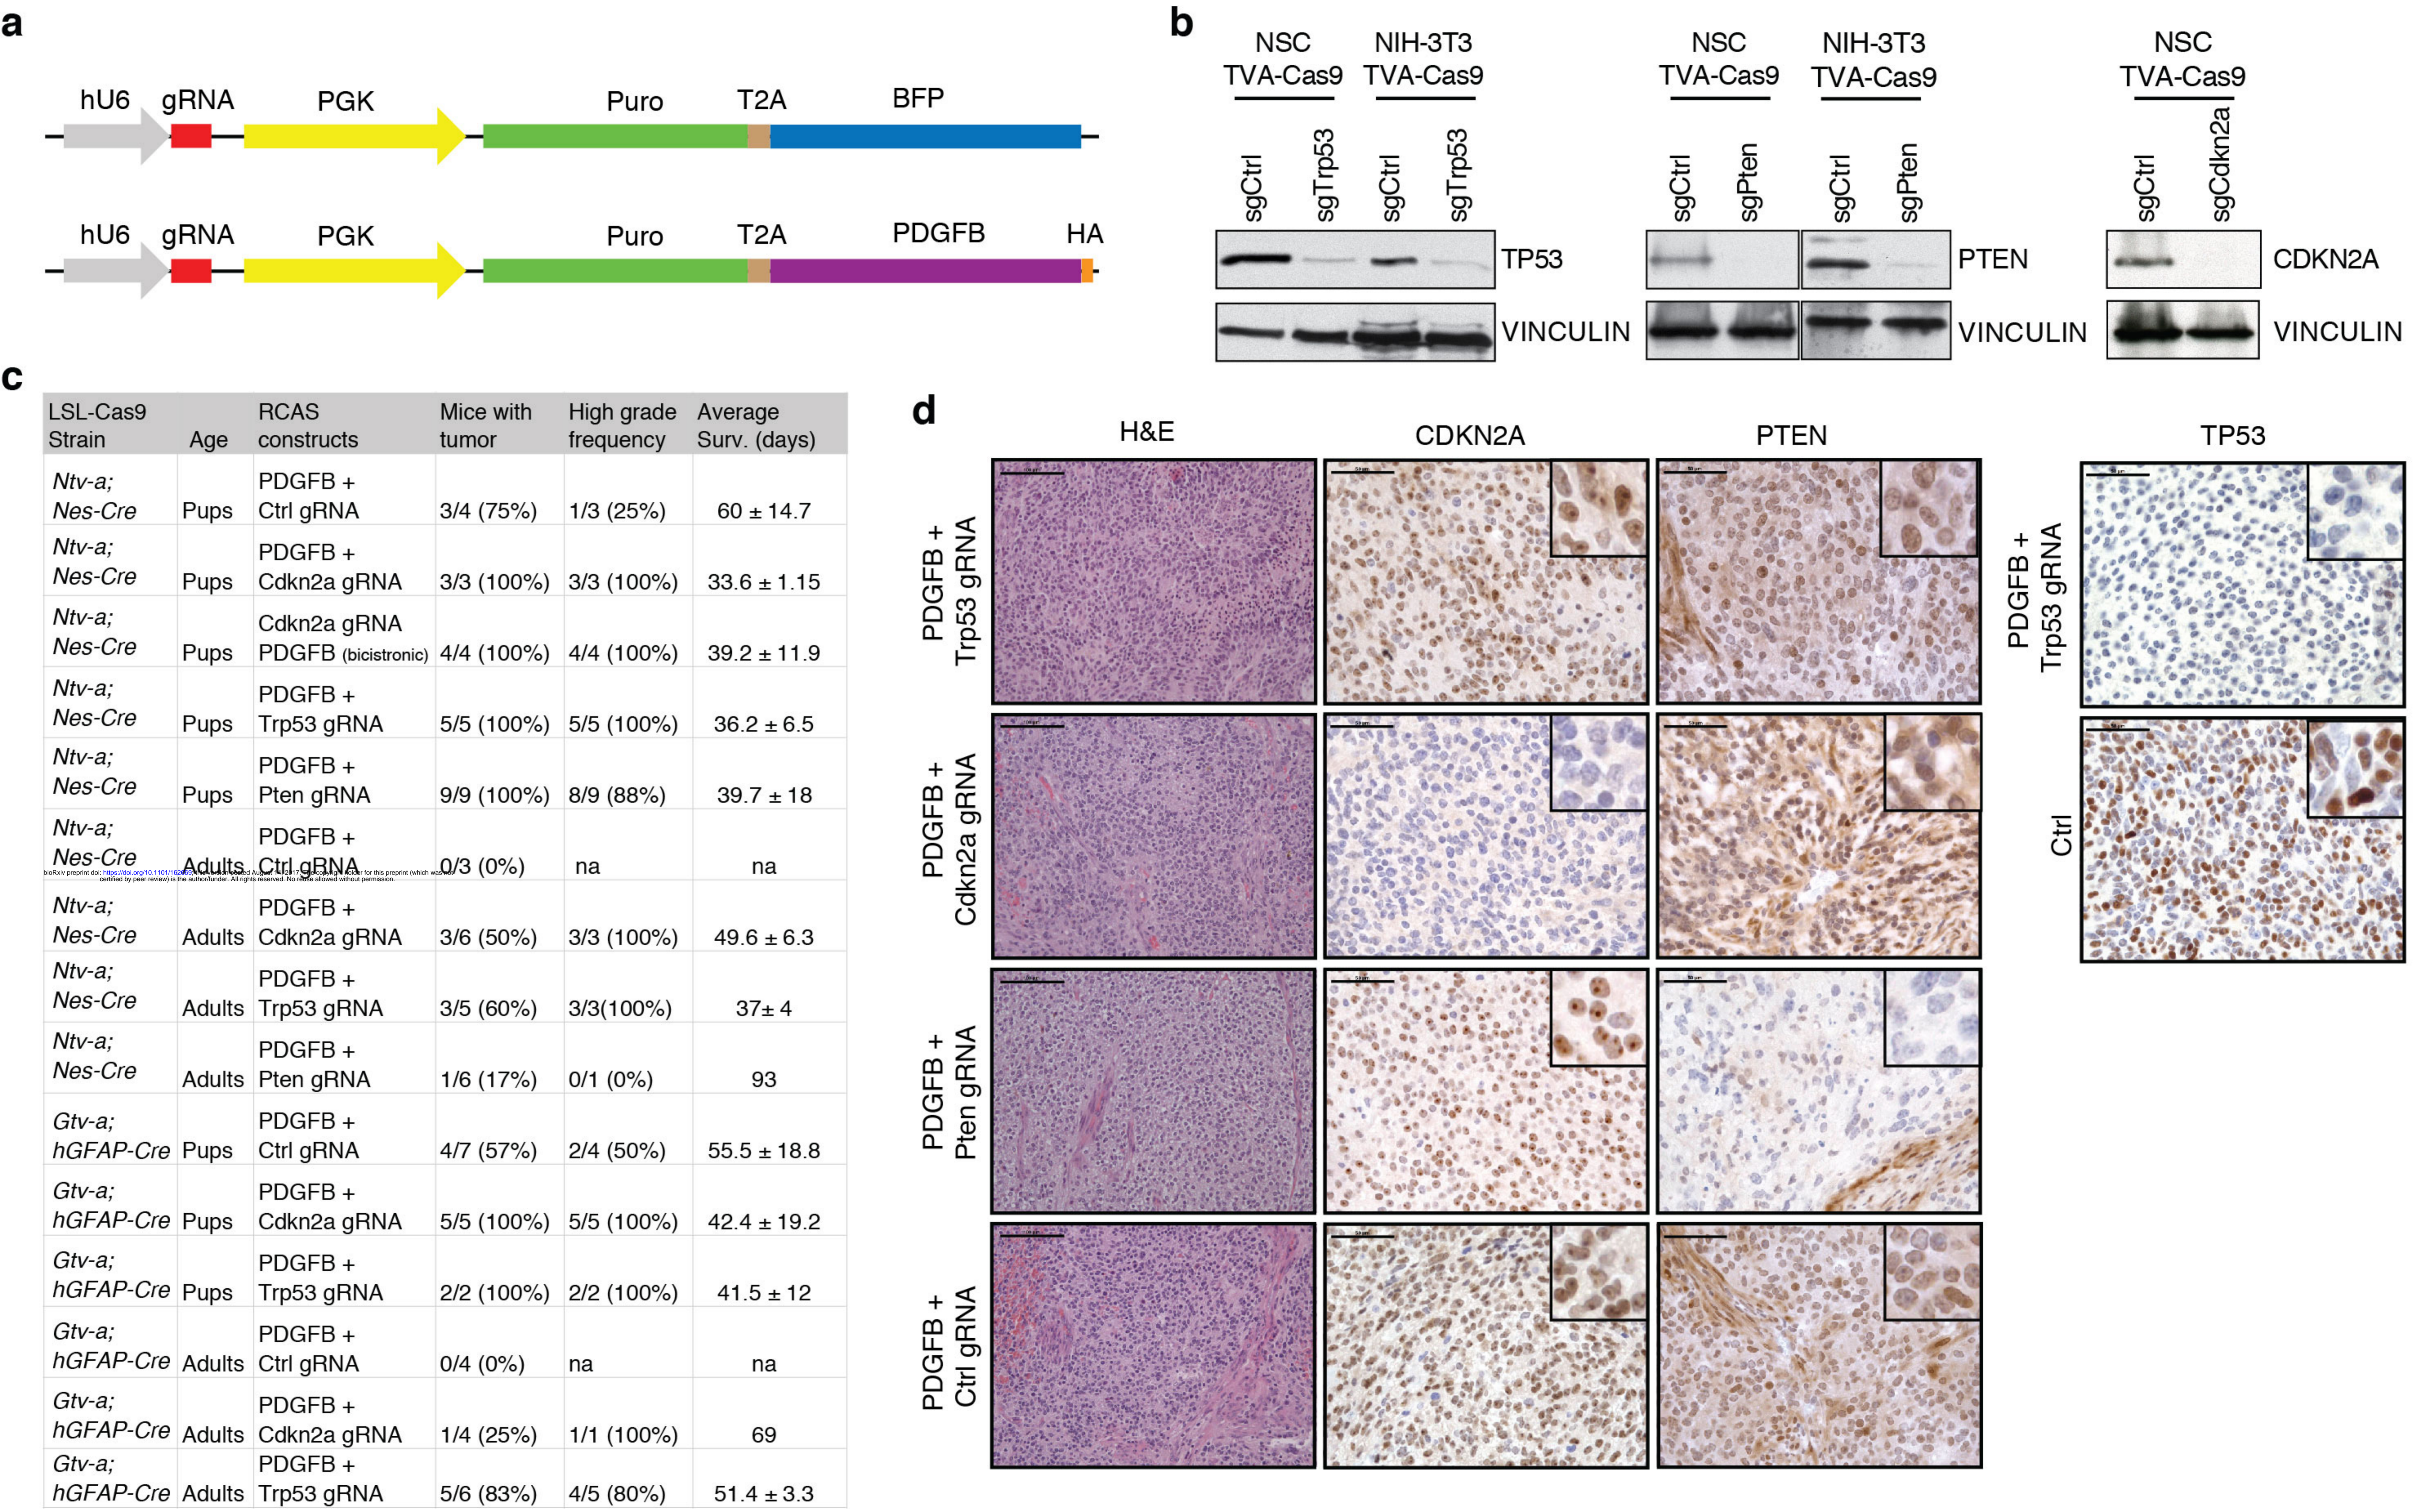

**a**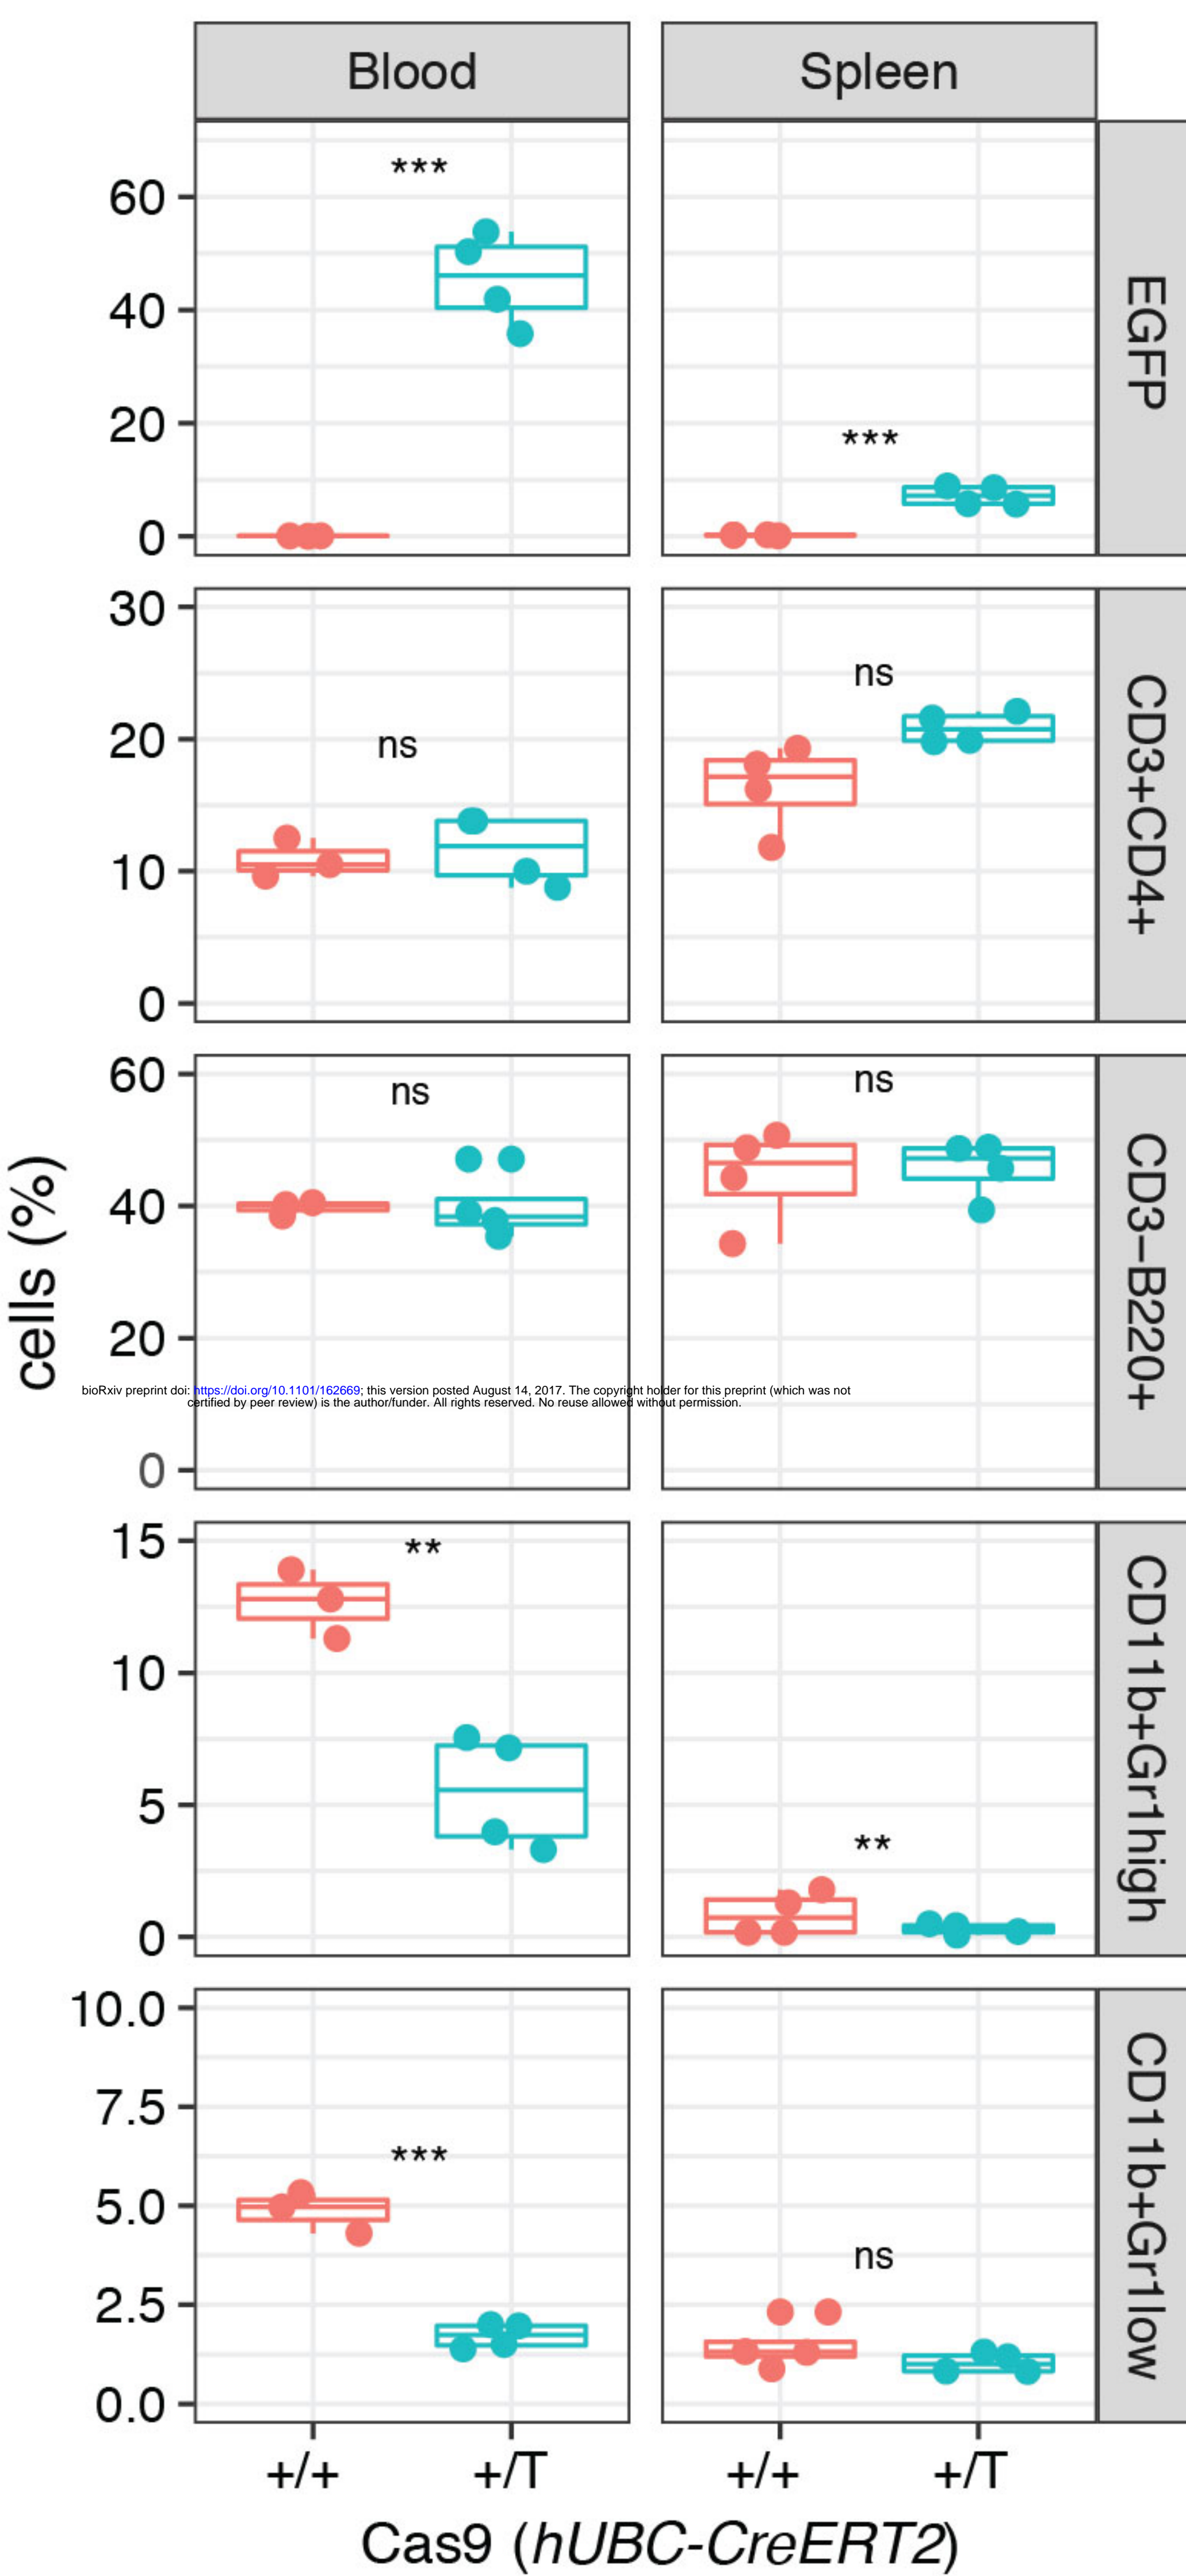**b**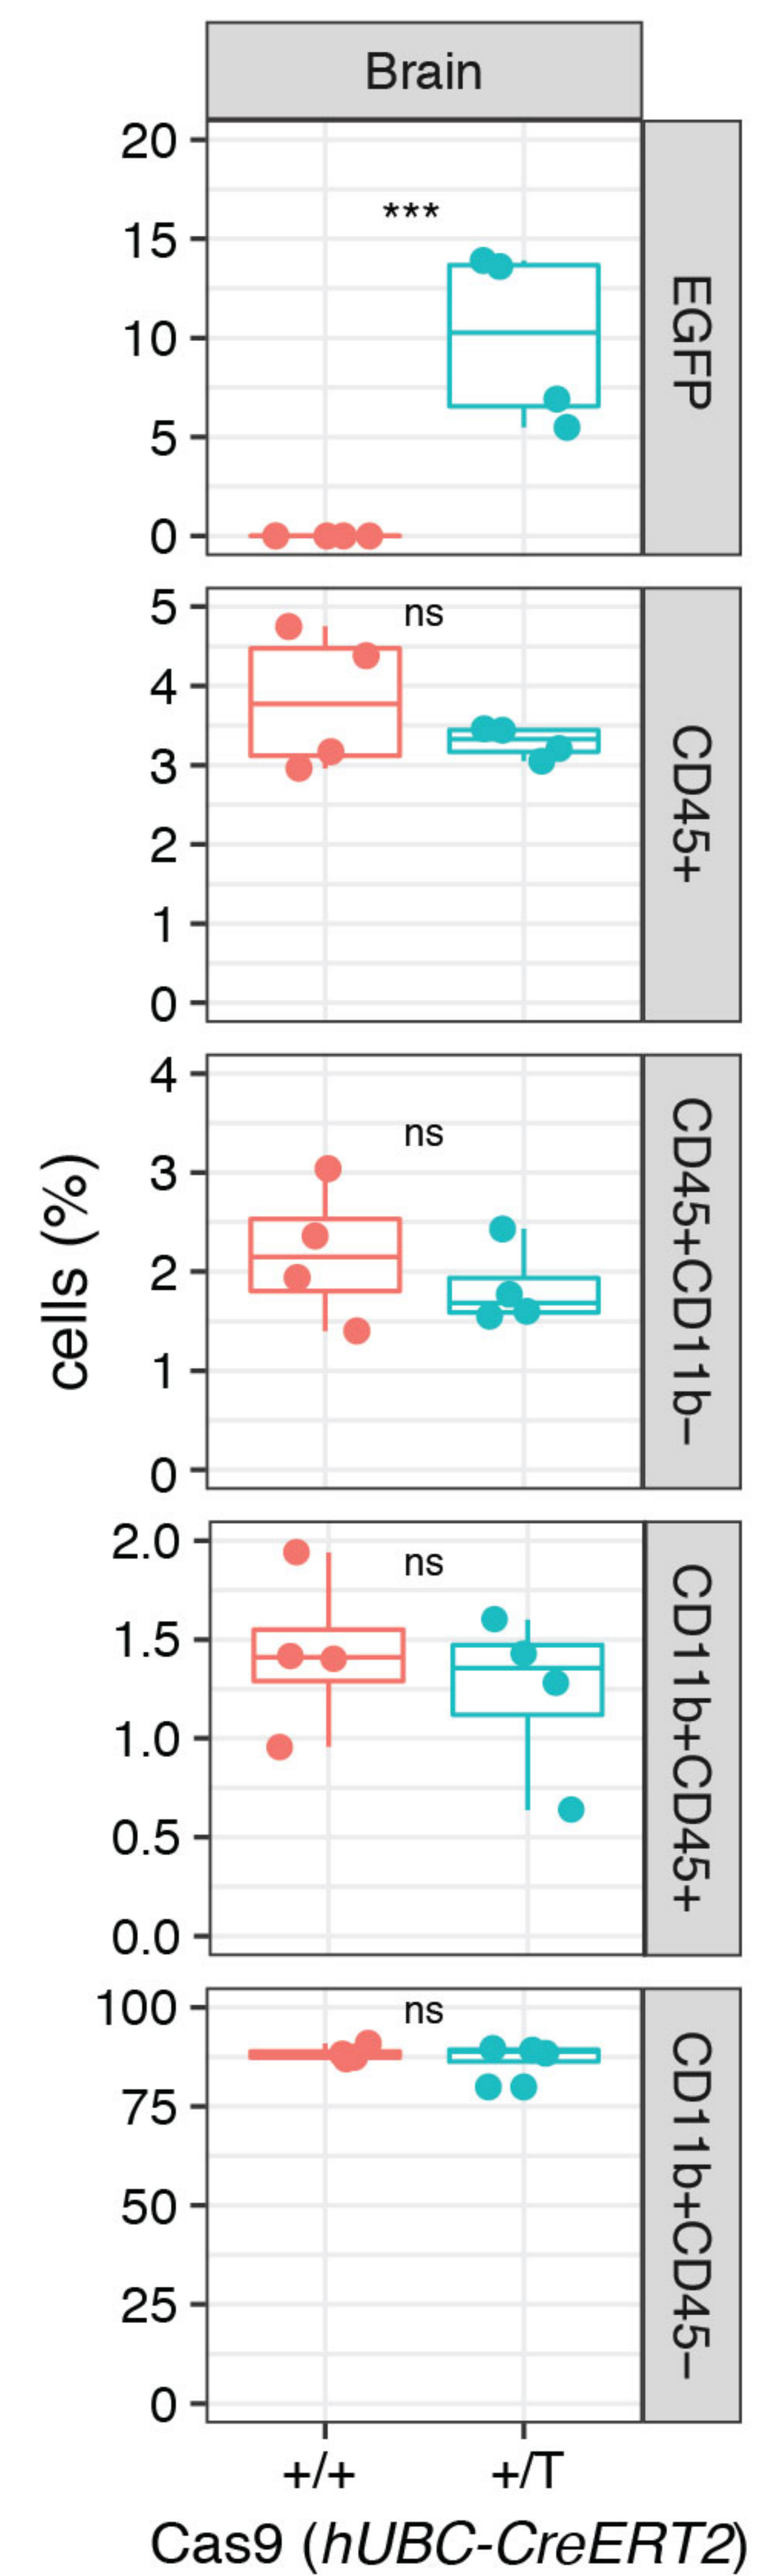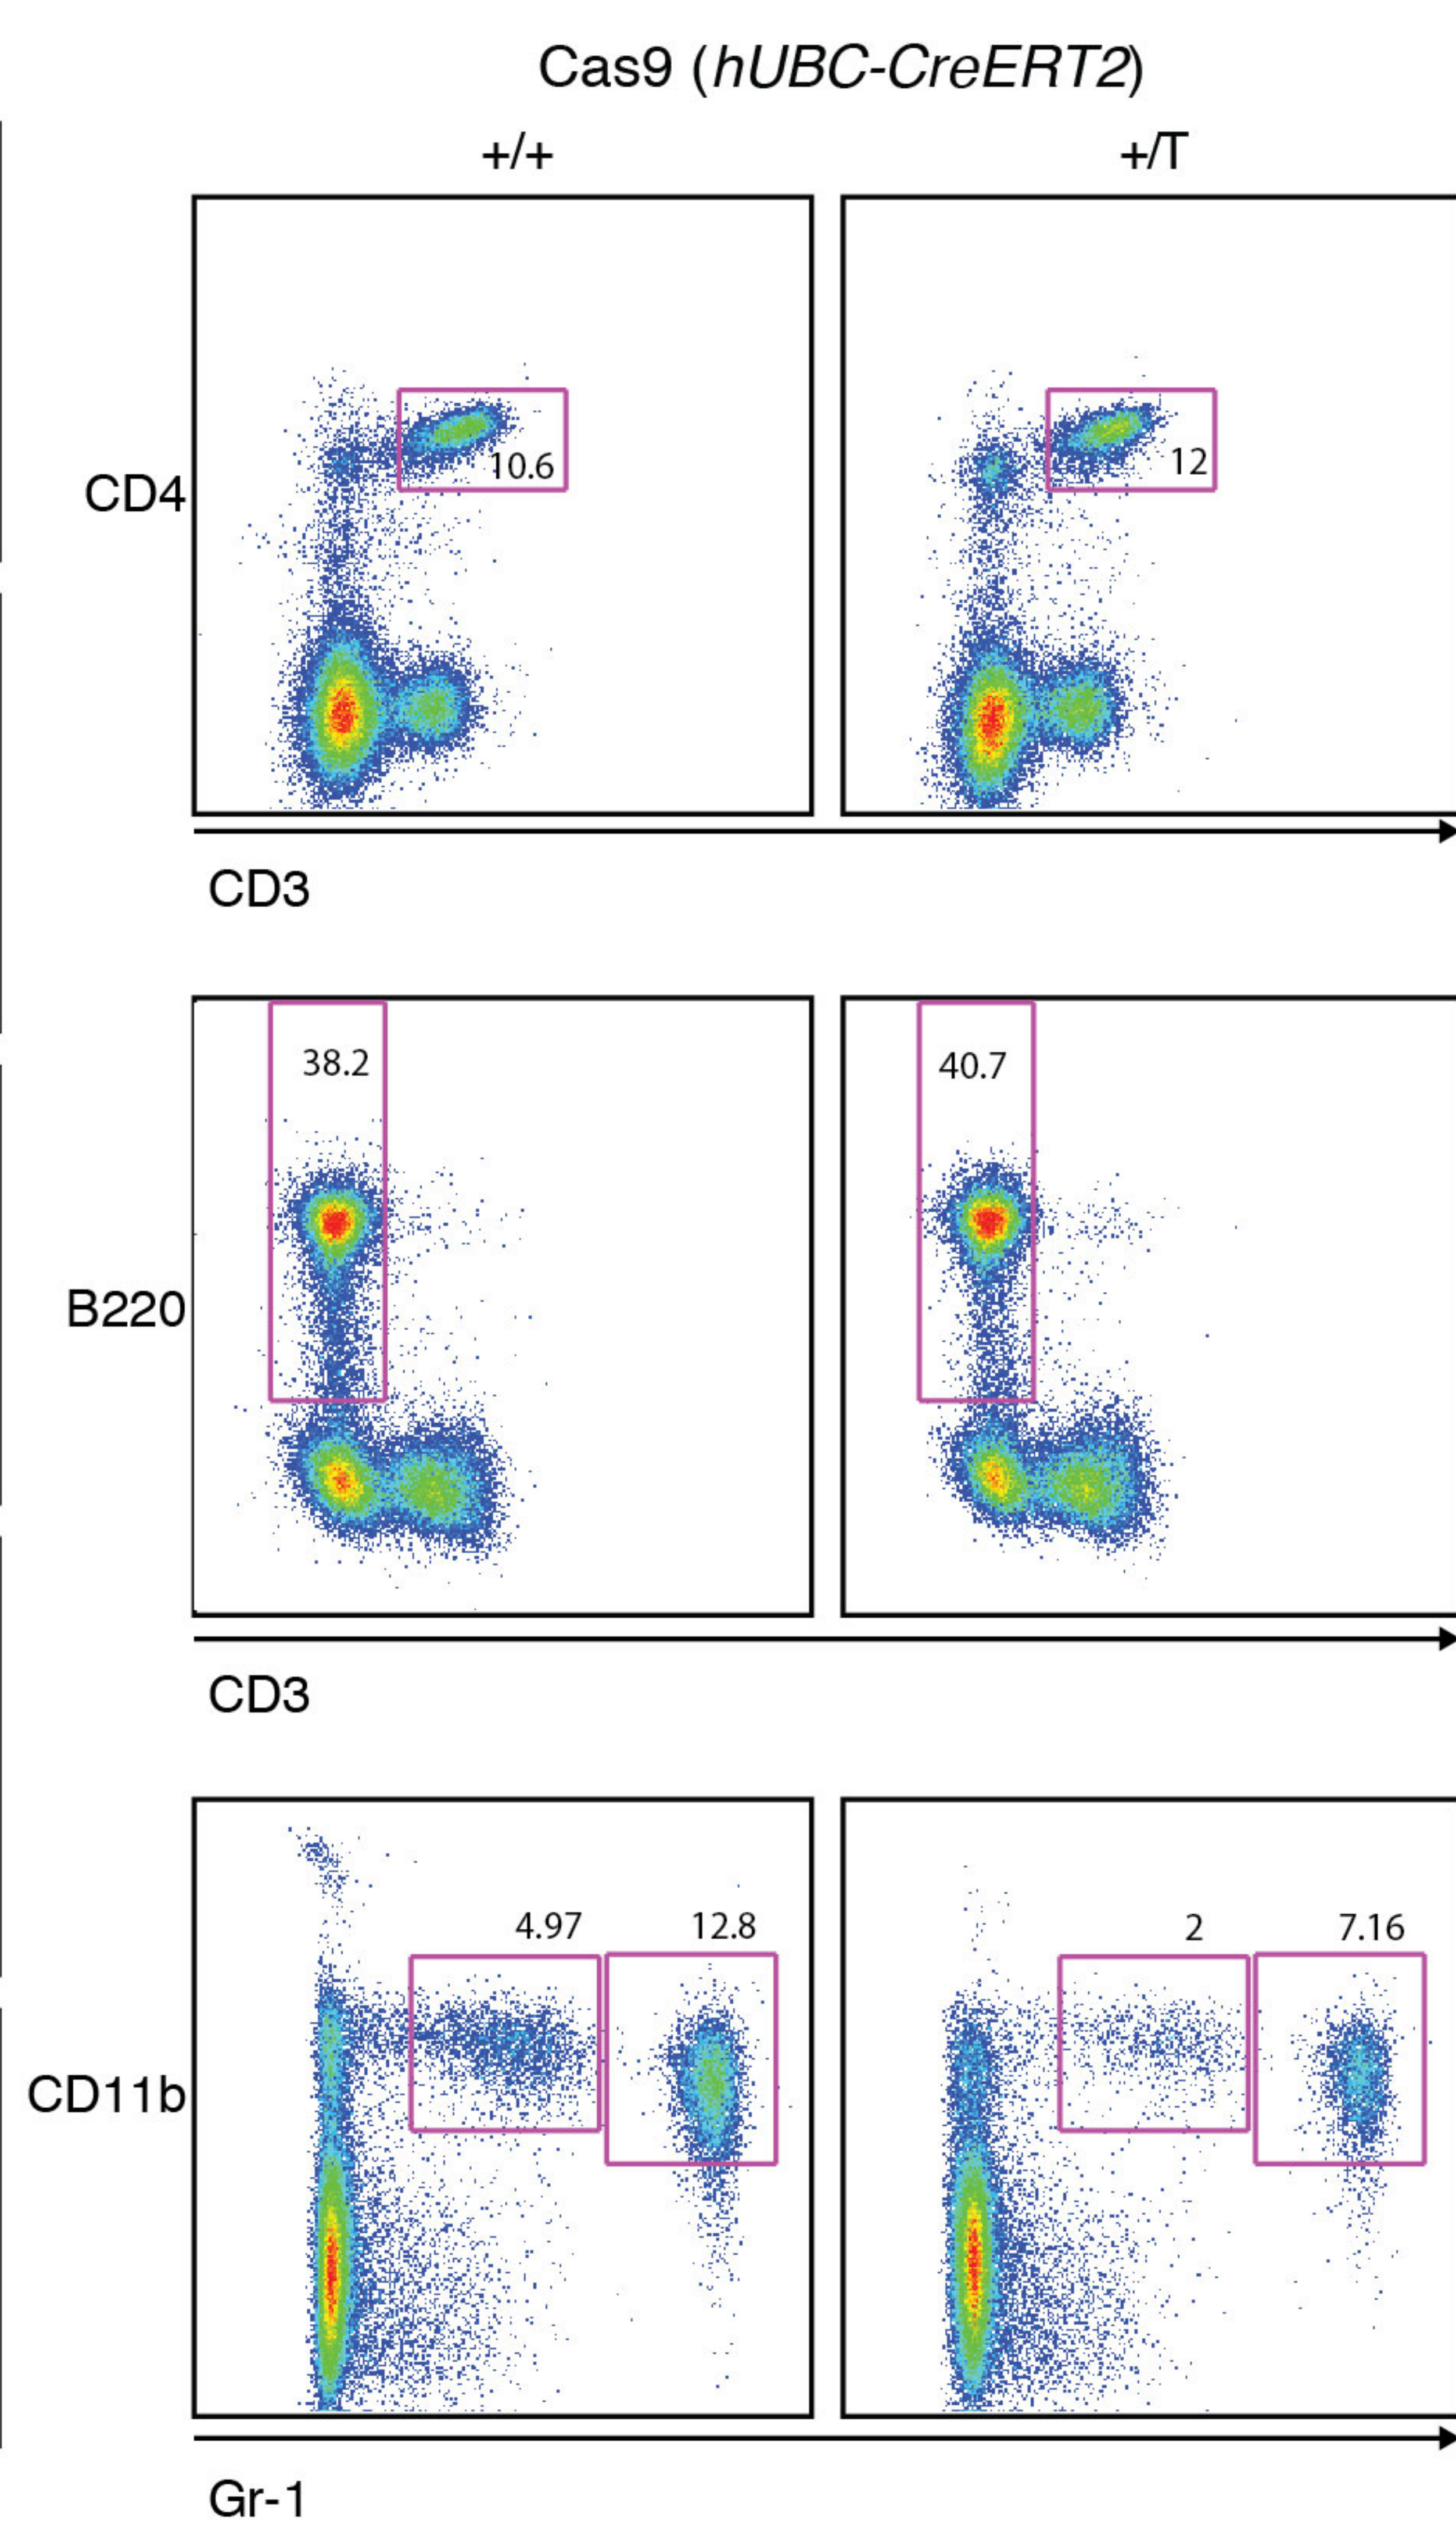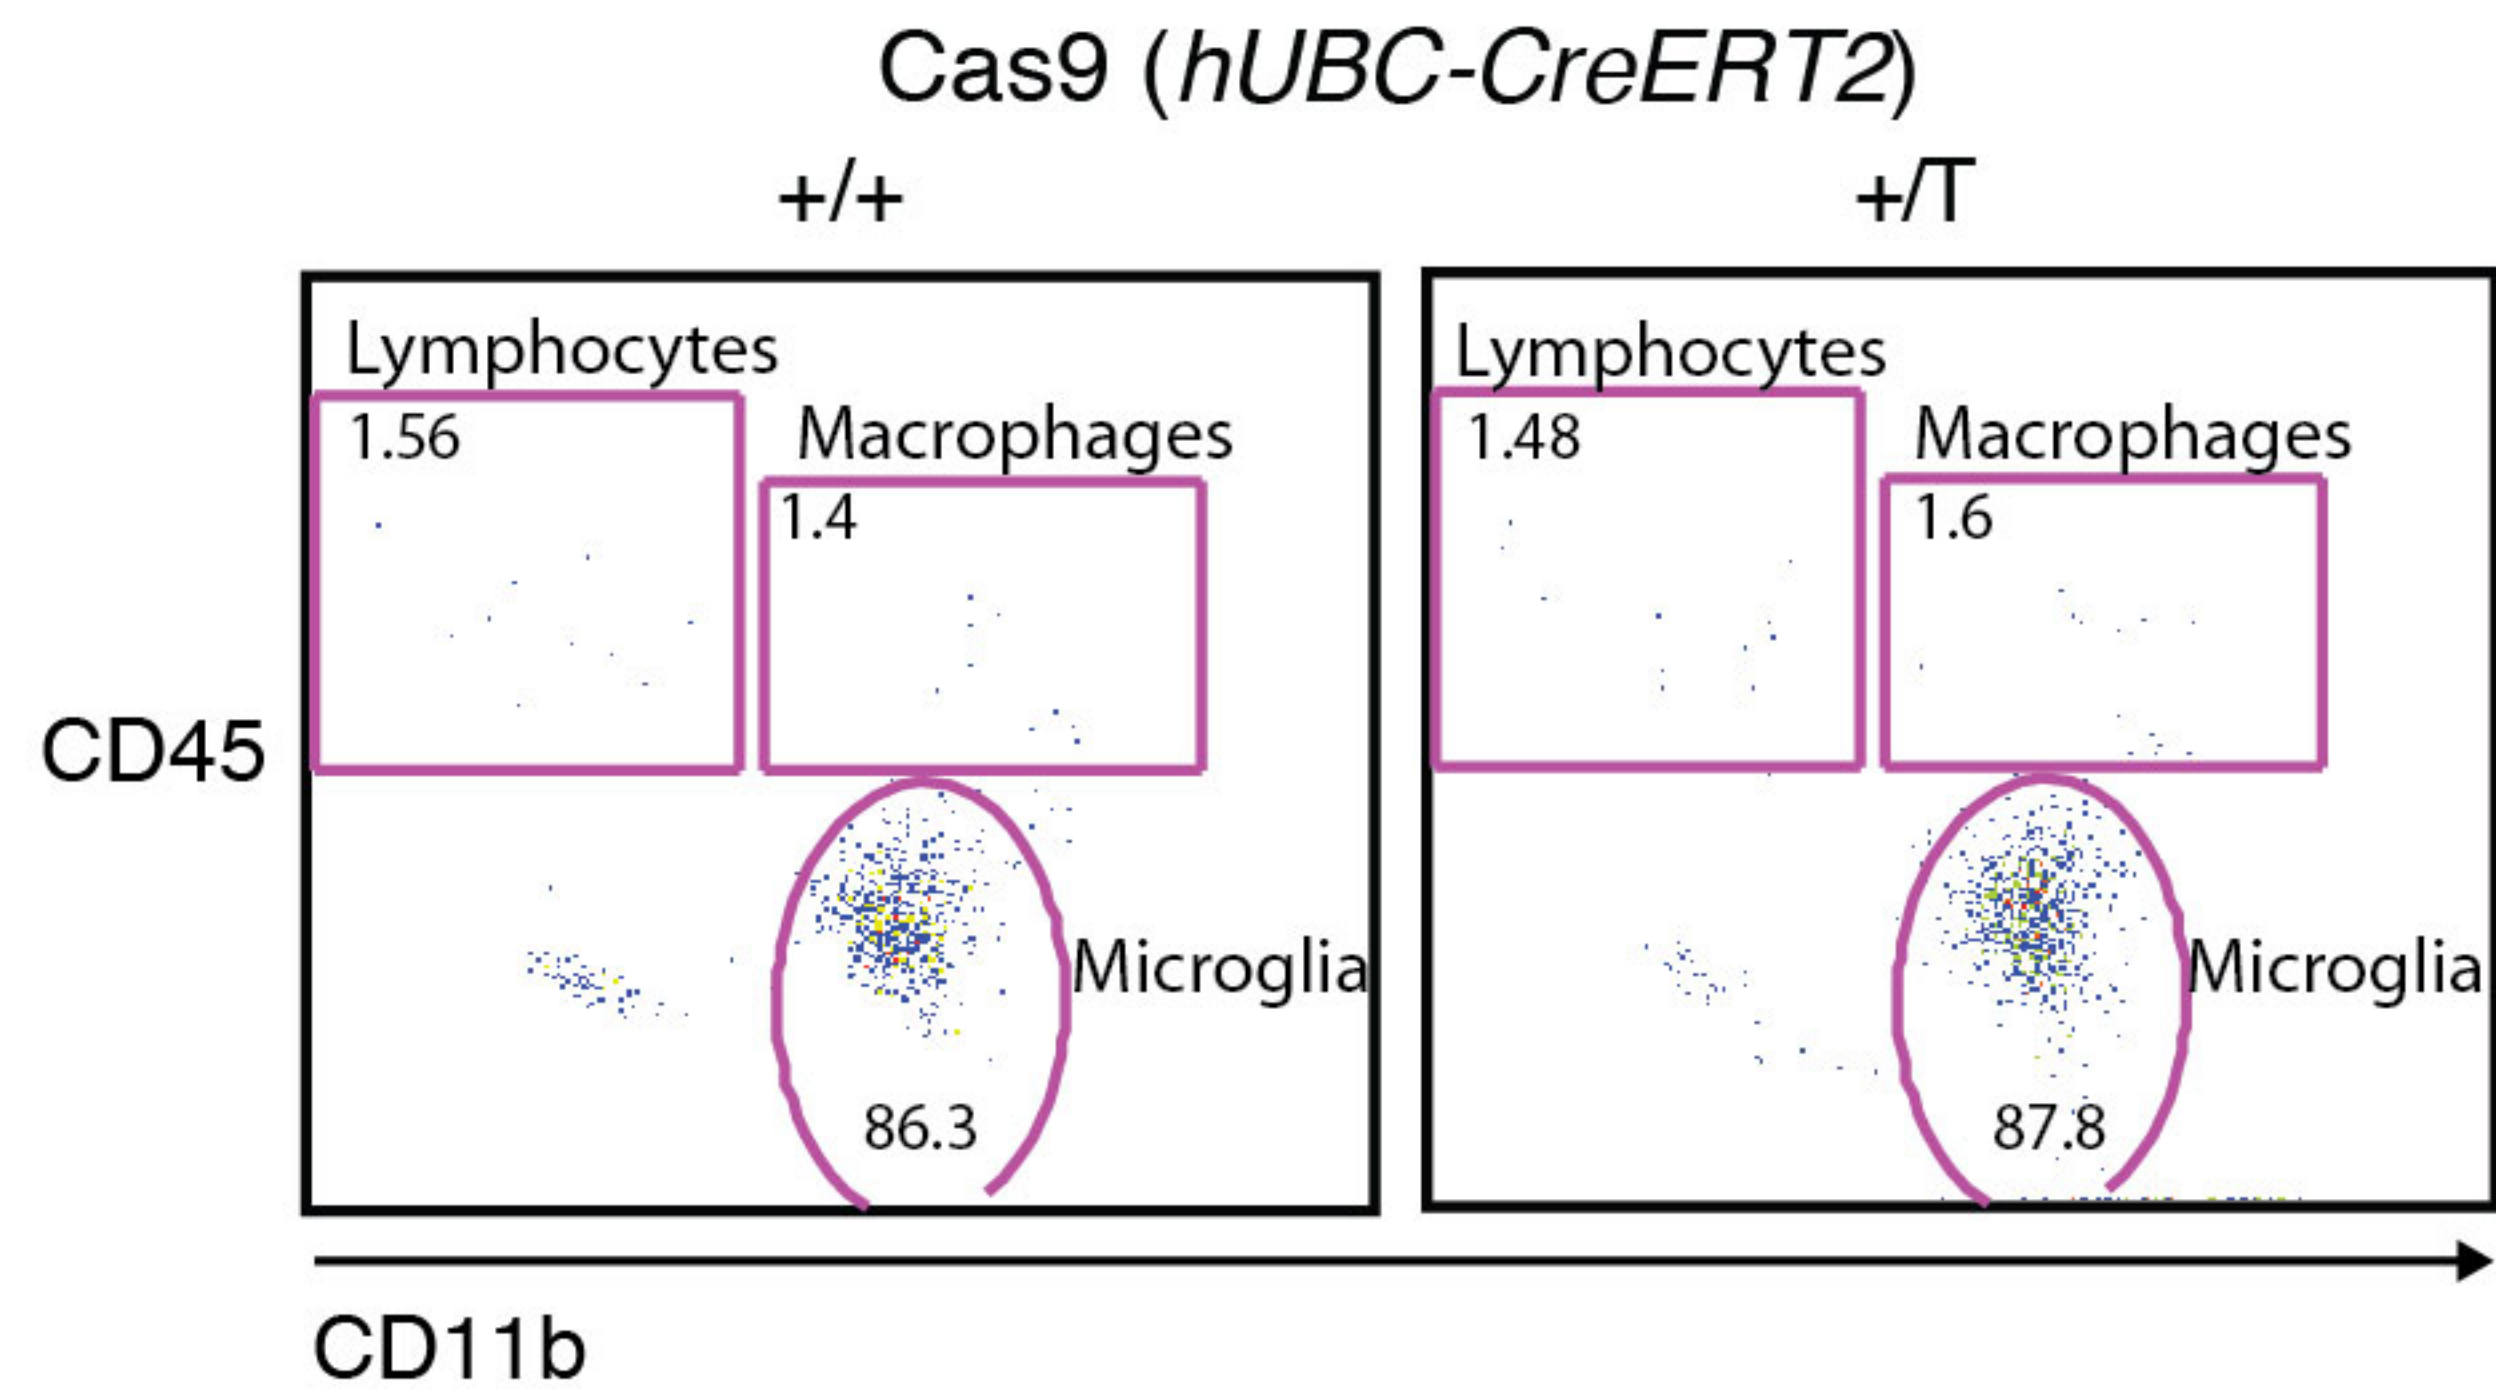**c**

| LSL-Cas9 Strain                           | RCAS constructs   | Treatment | Mice with tumor | High grade frequency | Average Surv. (days) |
|-------------------------------------------|-------------------|-----------|-----------------|----------------------|----------------------|
| <i>Ntv-a; hUBC-CreERT2</i> <sup>+/T</sup> | PDGFB + Ctrl gRNA | Mock      | 0/4 (0%)        | na                   | na                   |
| <i>Ntv-a; hUBC-CreERT2</i> <sup>+/T</sup> | PDGFB + Ctrl gRNA | Tamoxifen | 0/3 (0%)        | na                   | na                   |
| <i>Ntv-a; hUBC-CreERT2</i> <sup>+/T</sup> | PDGFB + p53 gRNA  | Mock      | 1/3 (33%)       | 0/1 (0%)             | 84                   |
| <i>Ntv-a; hUBC-CreERT2</i> <sup>+/T</sup> | PDGFB + p53 gRNA  | Tamoxifen | 3/3 (100%)      | 3/3 (100%)           | 62 ± 19.15           |

**d**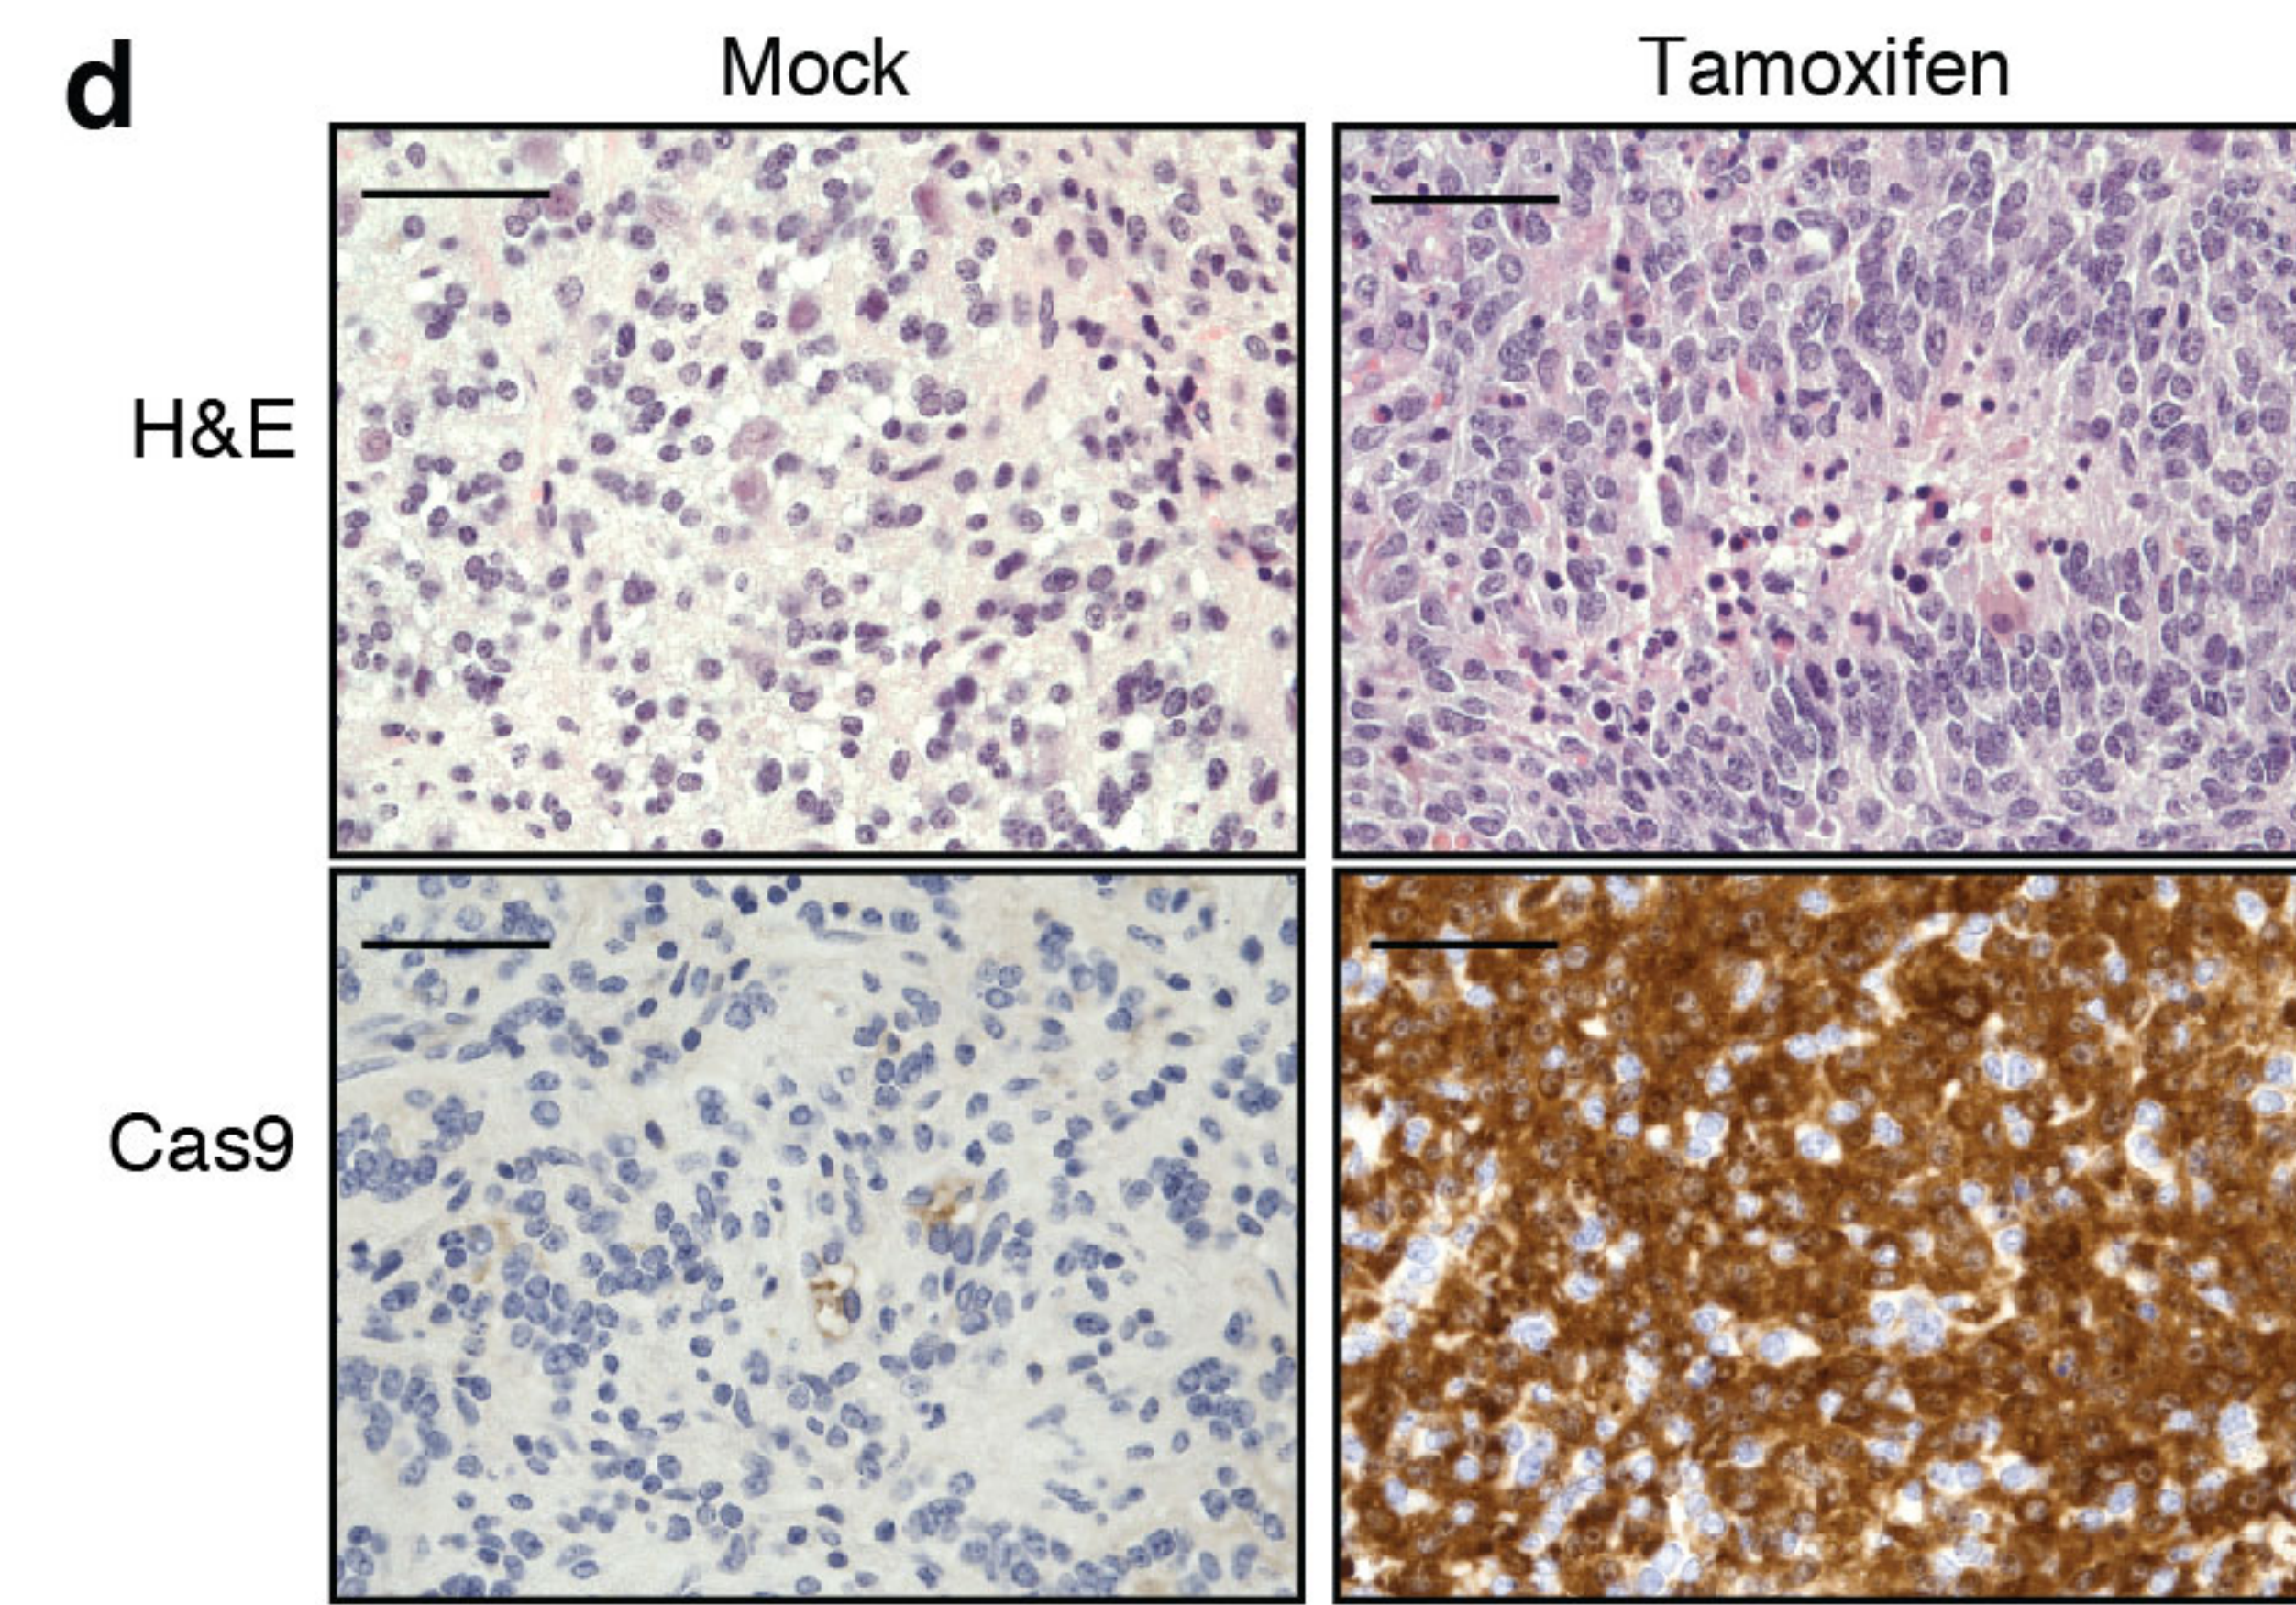

a

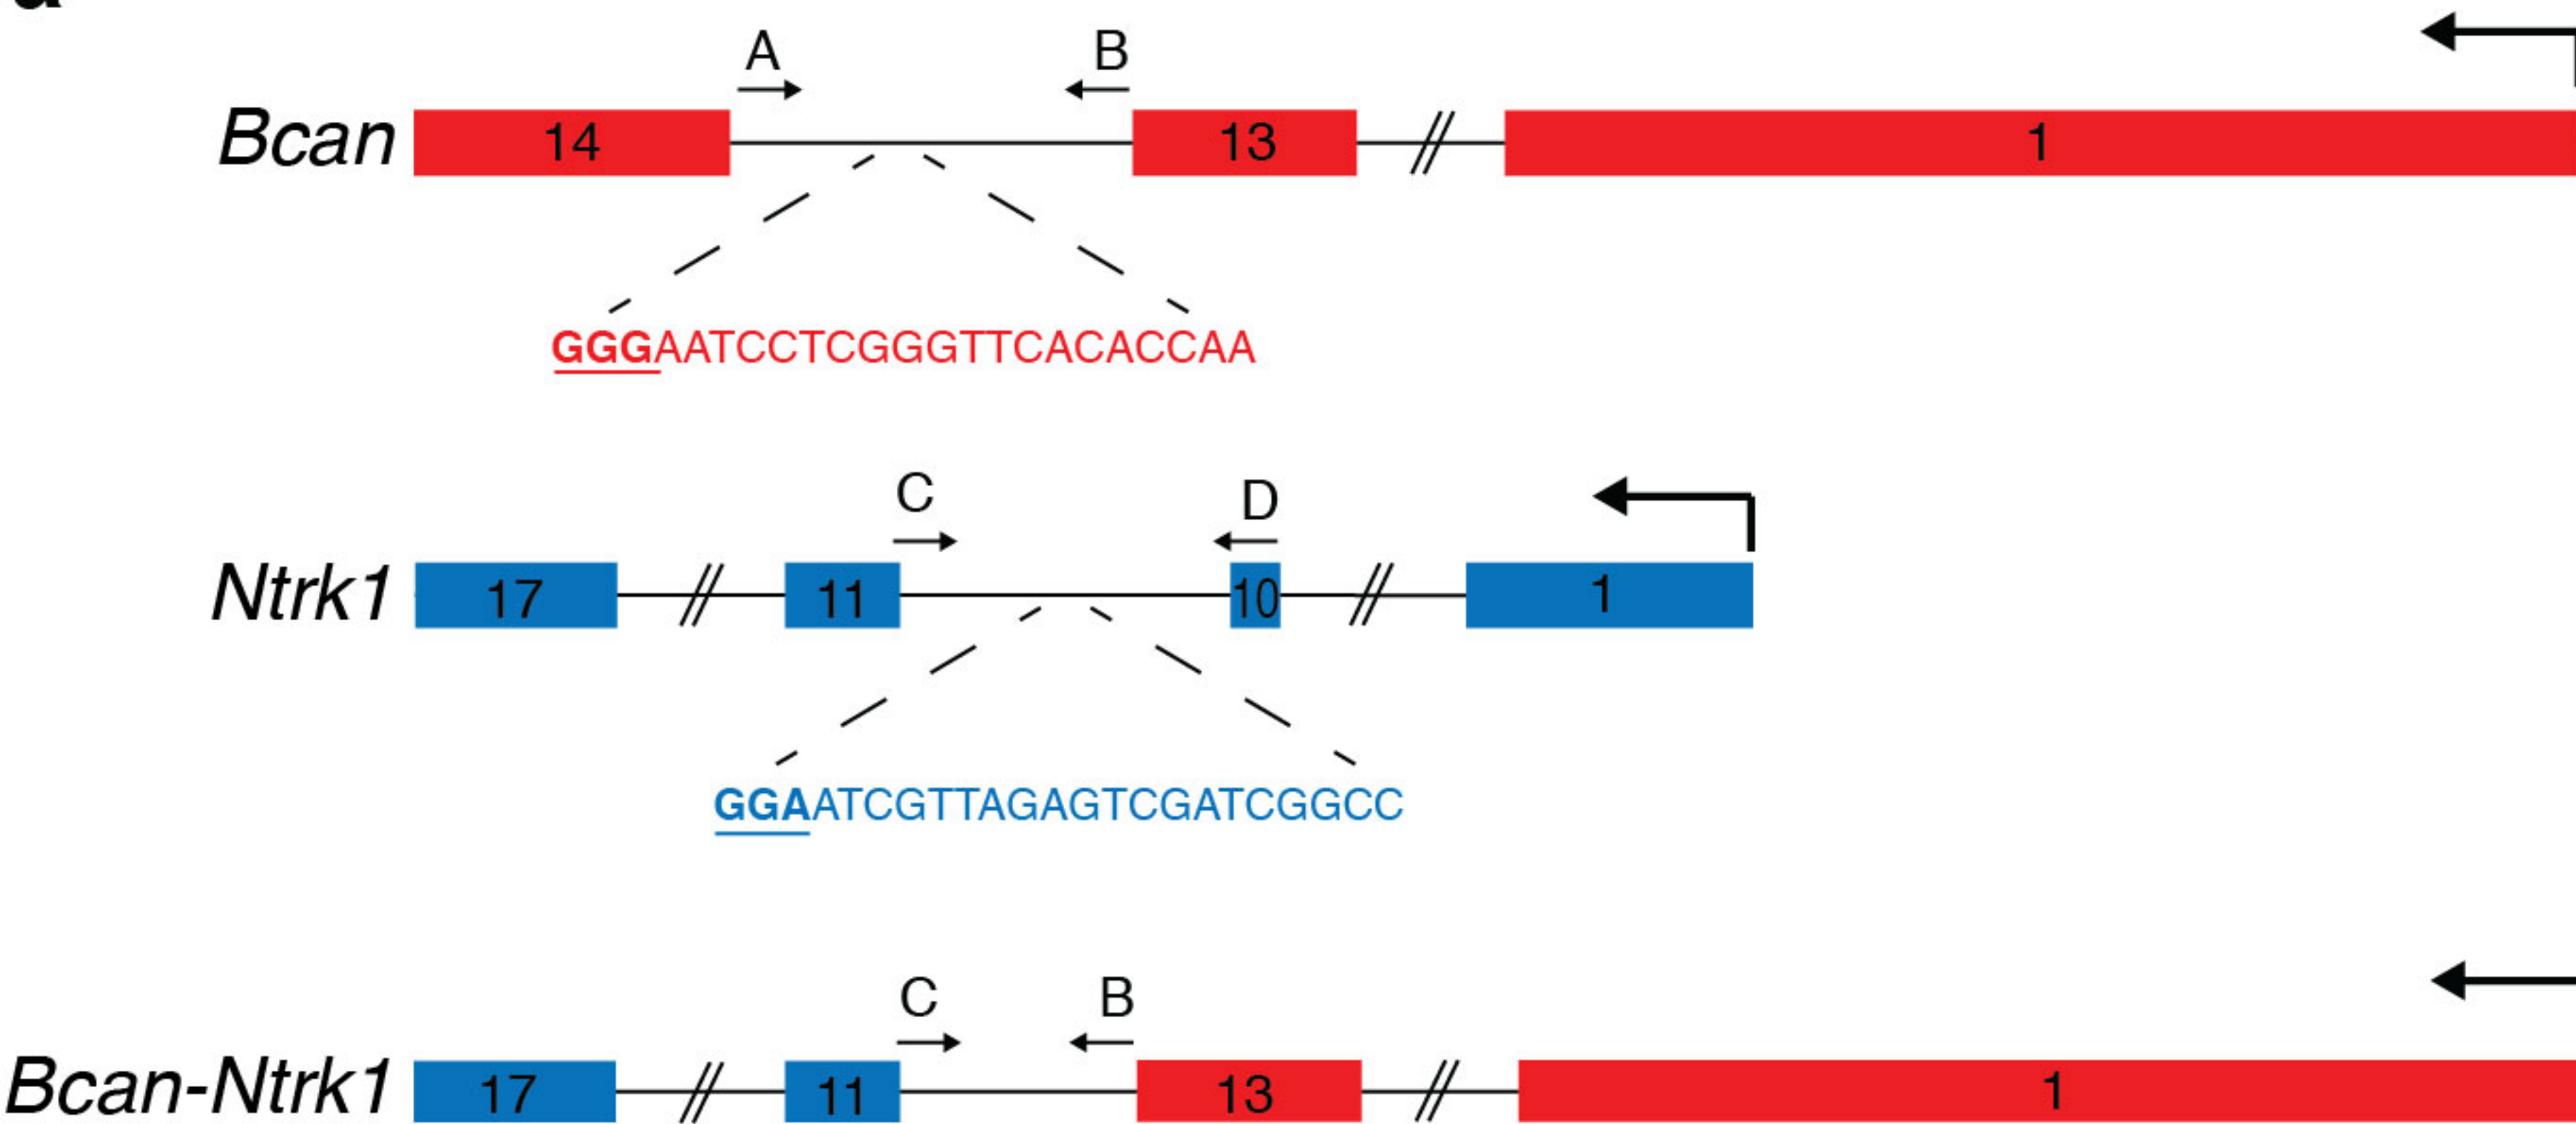

b

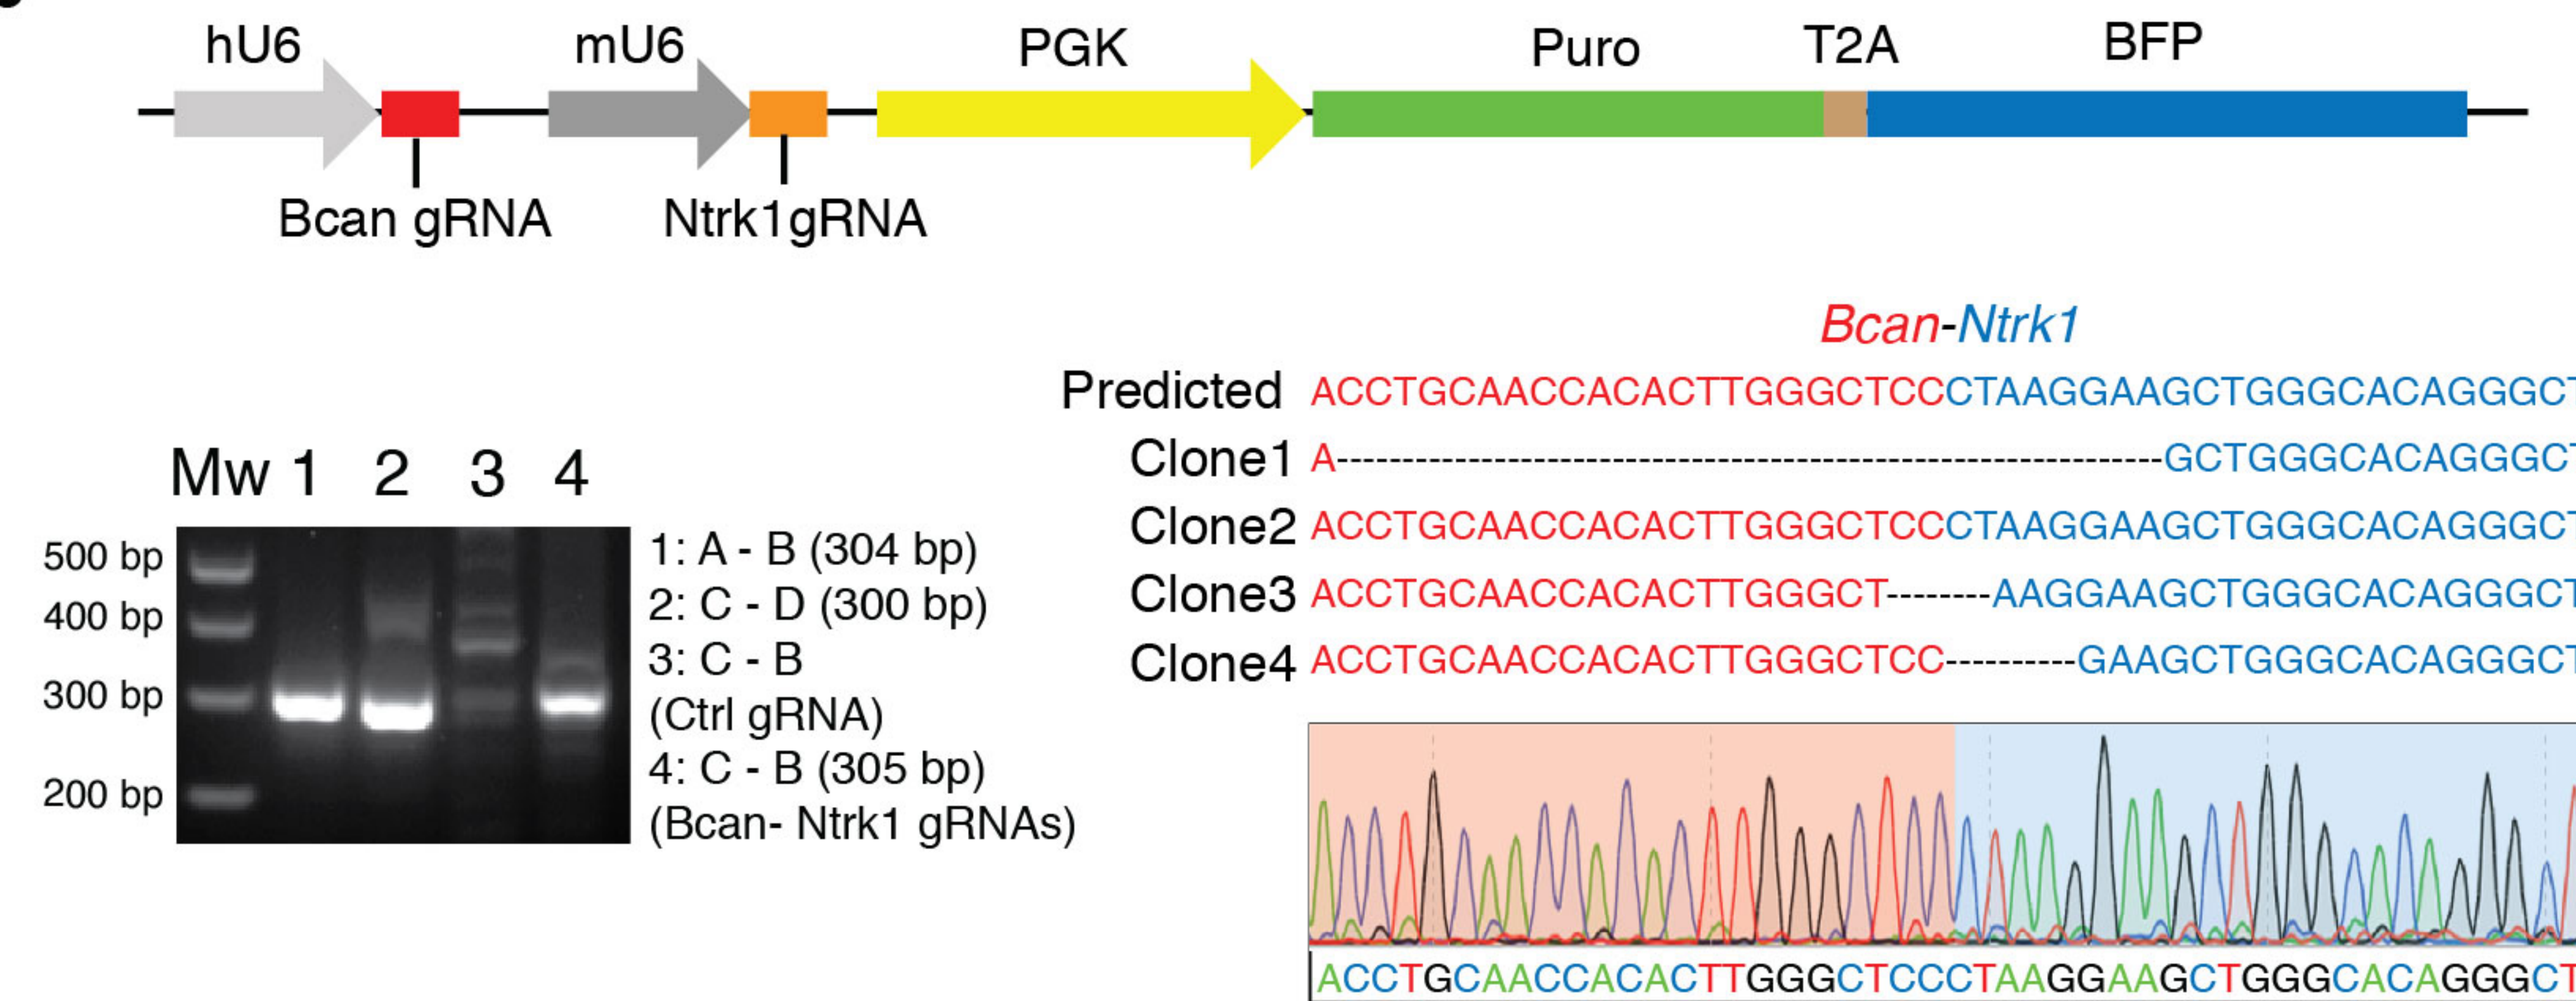

c

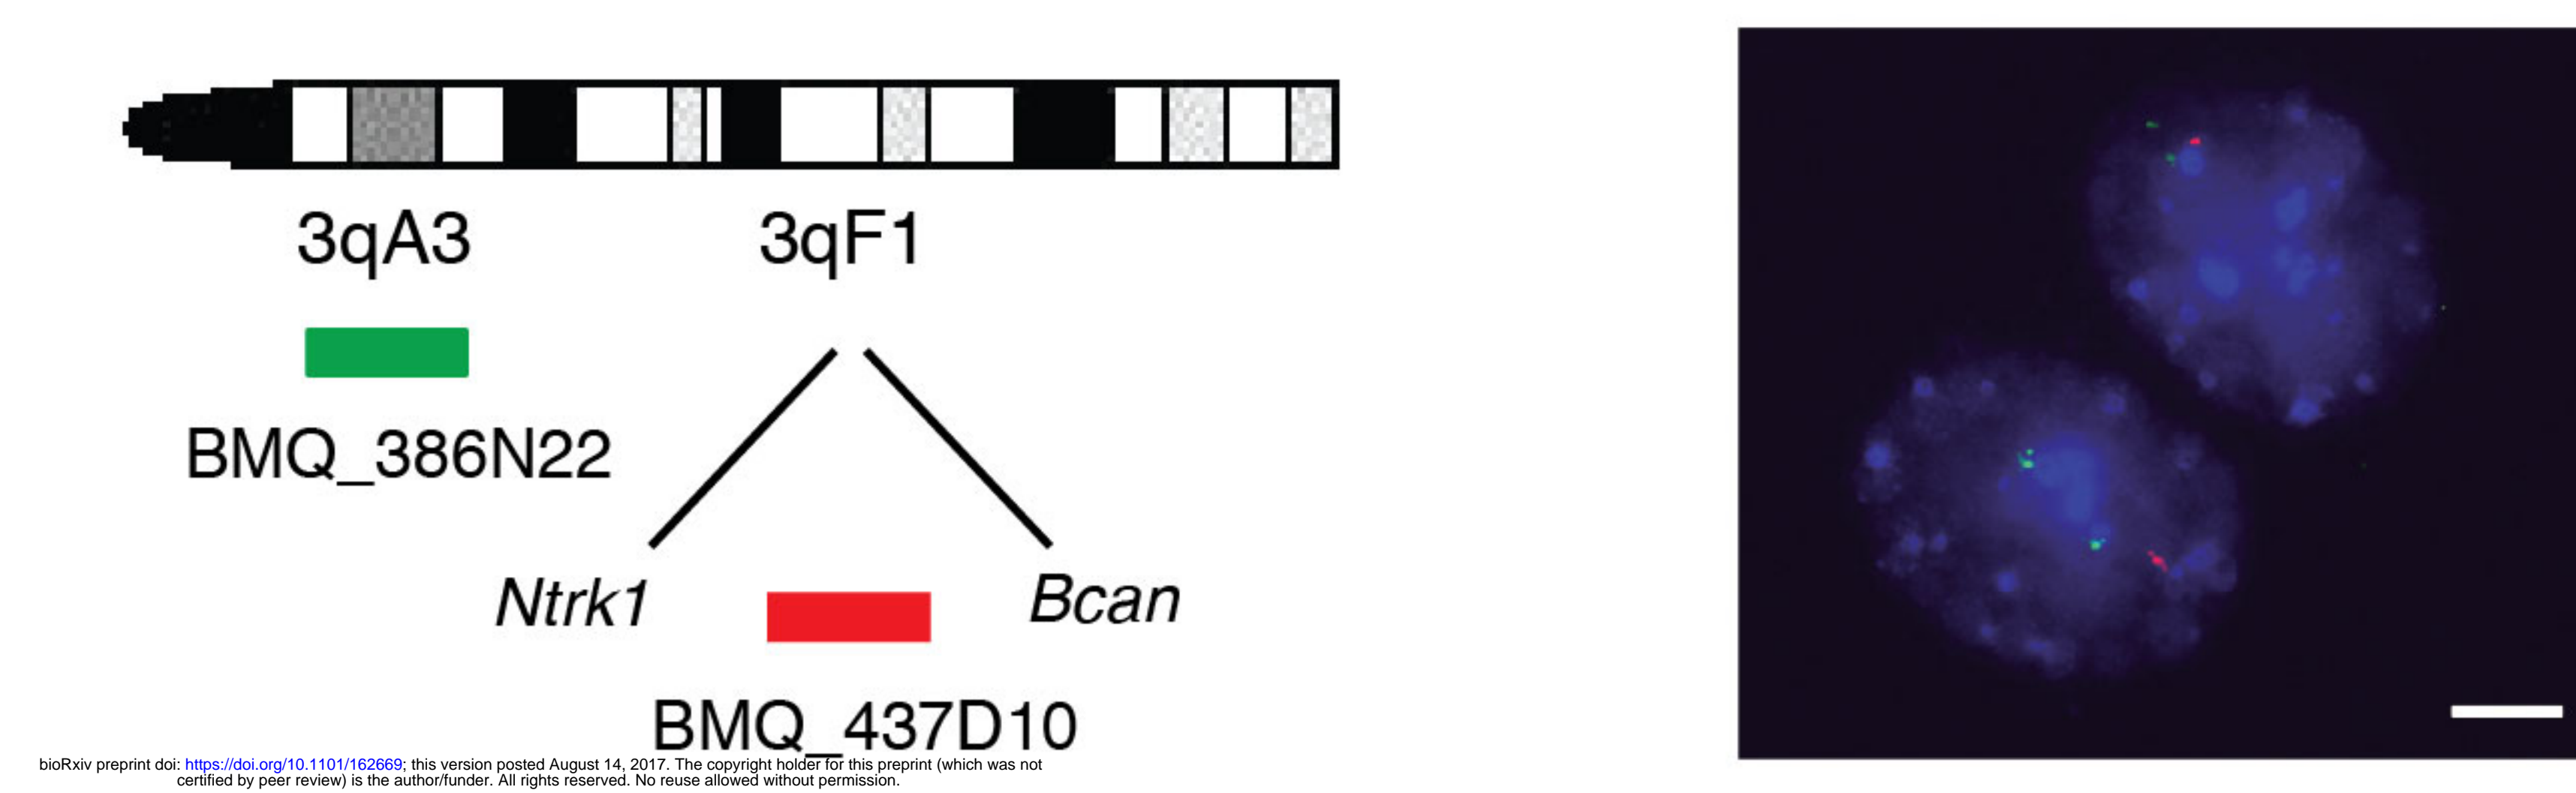

d

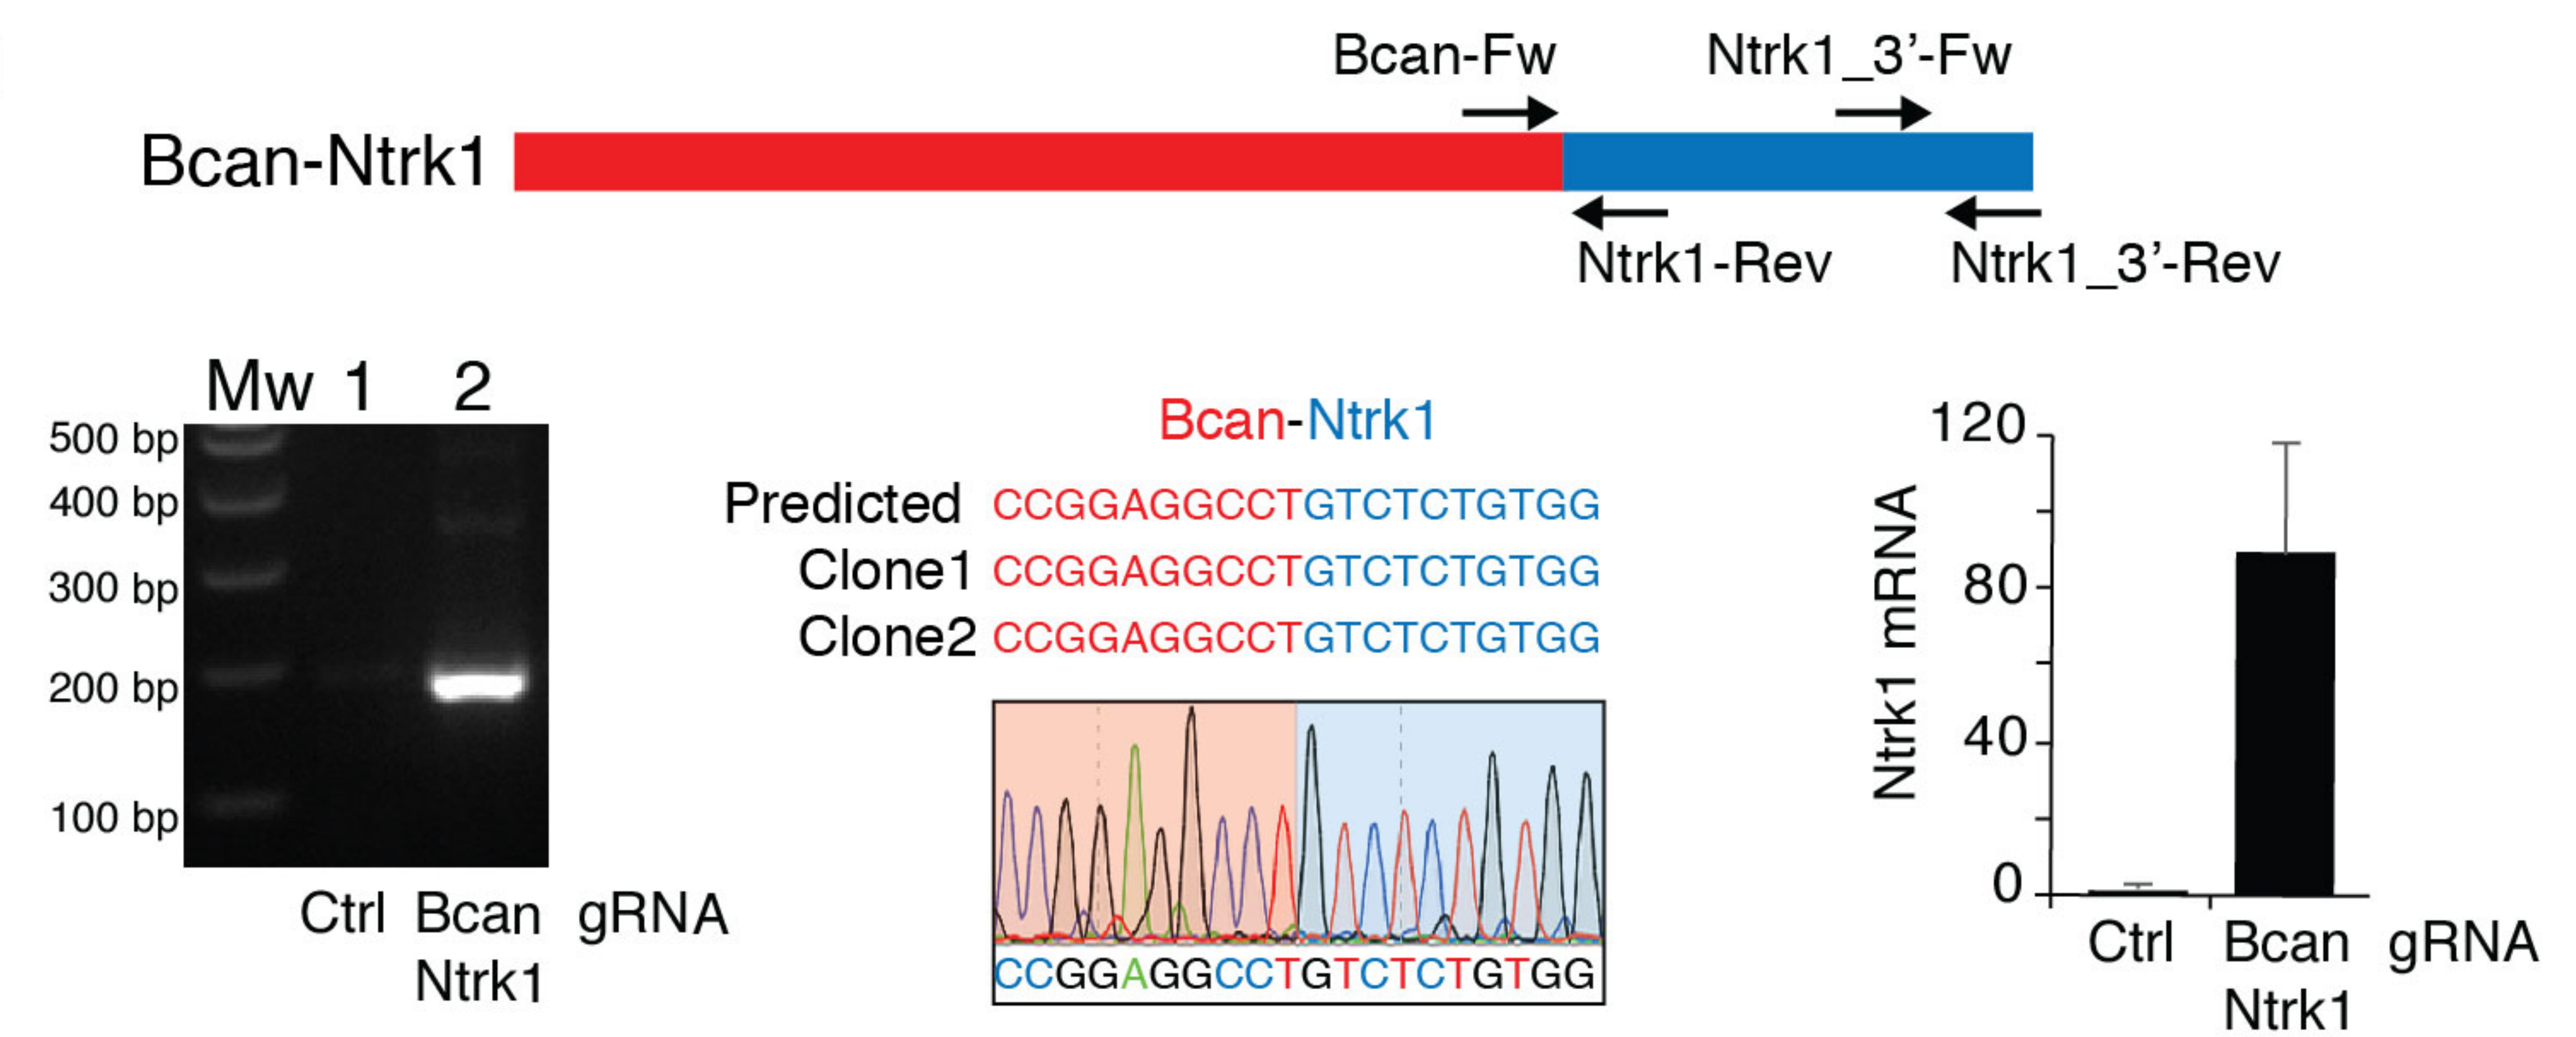

e

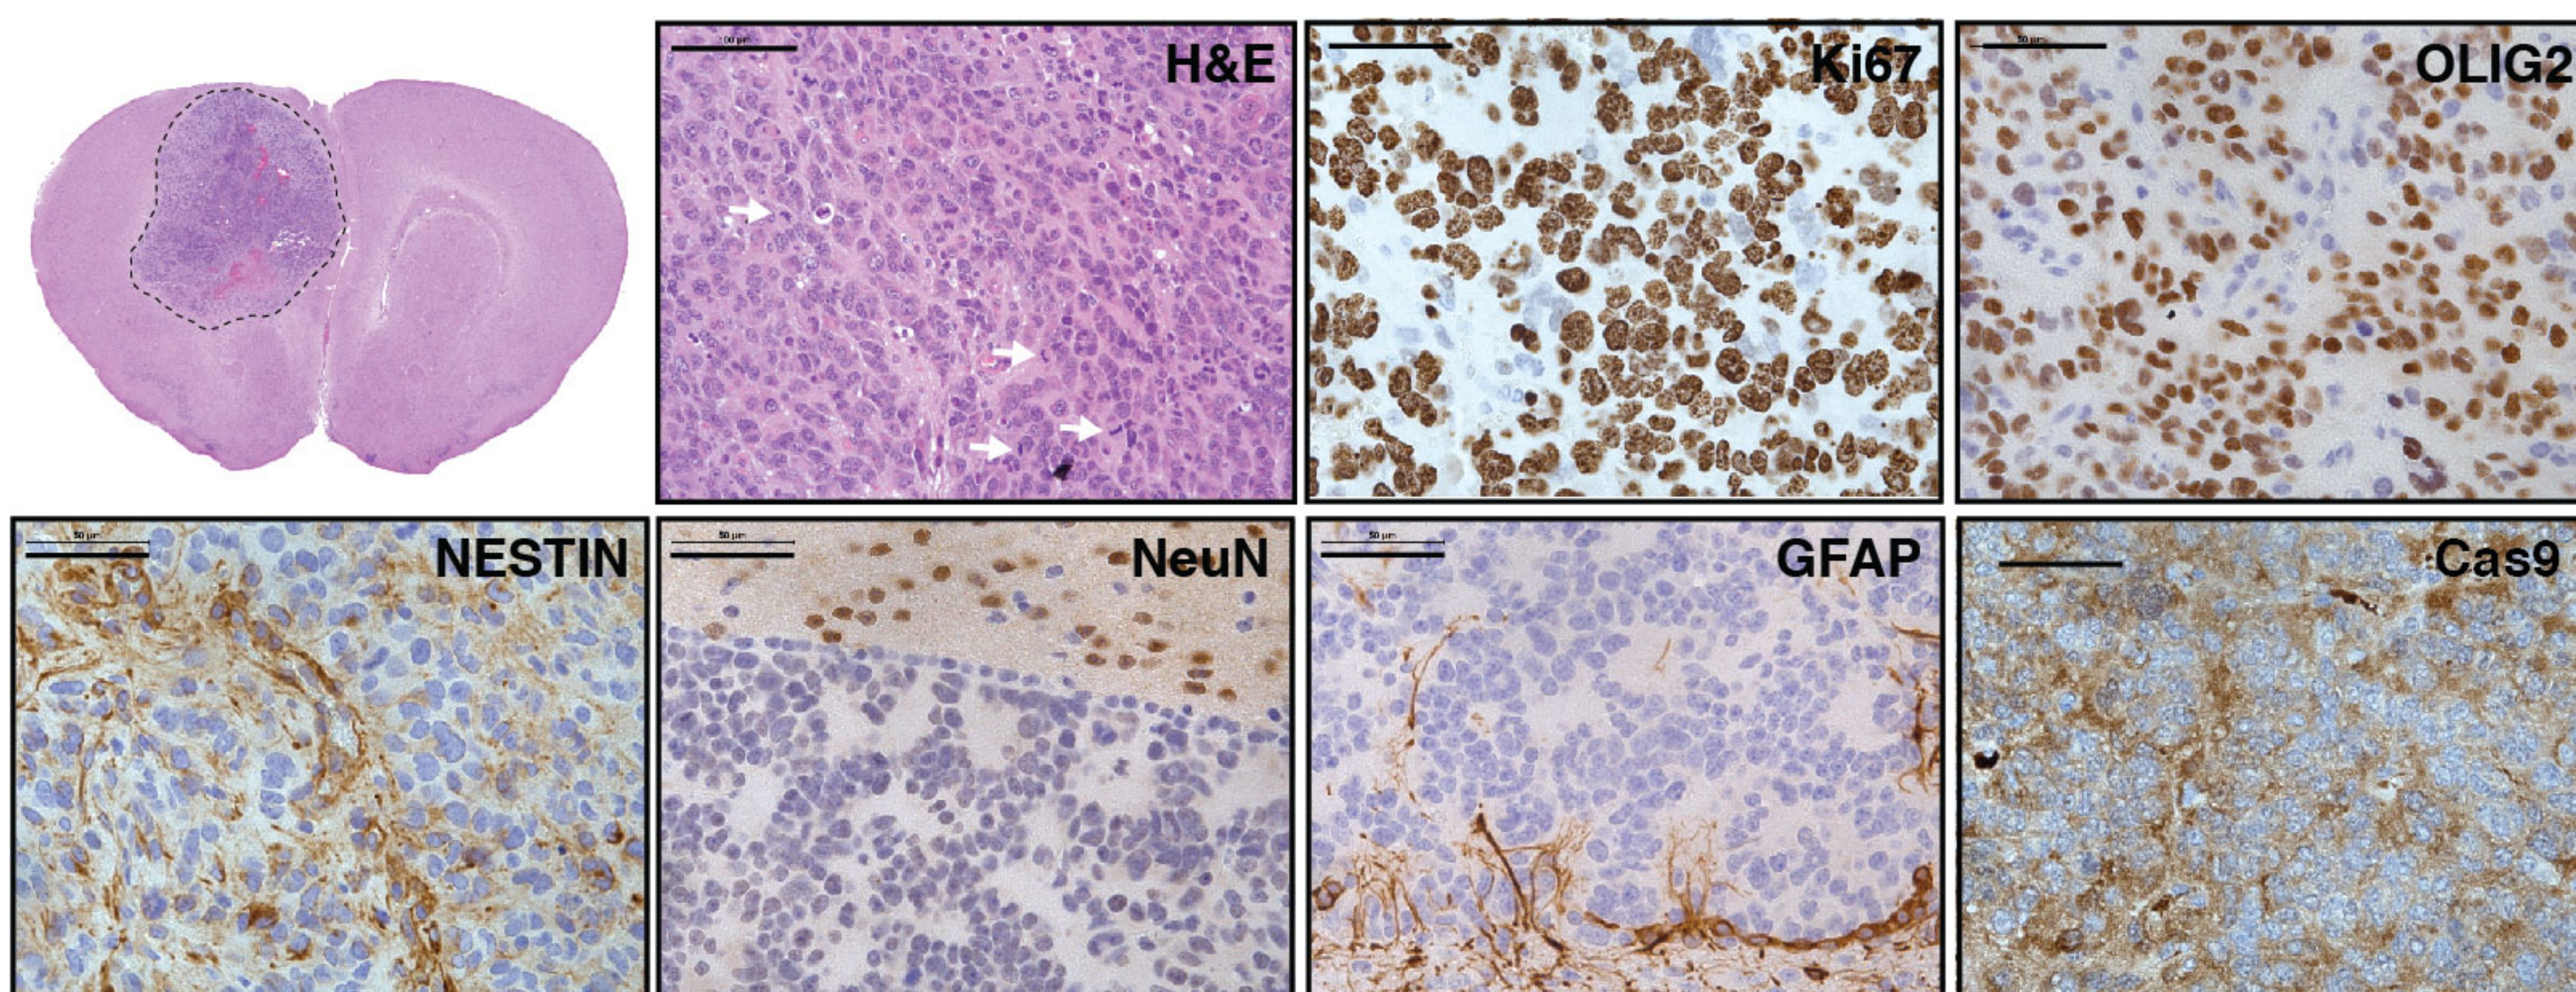

f

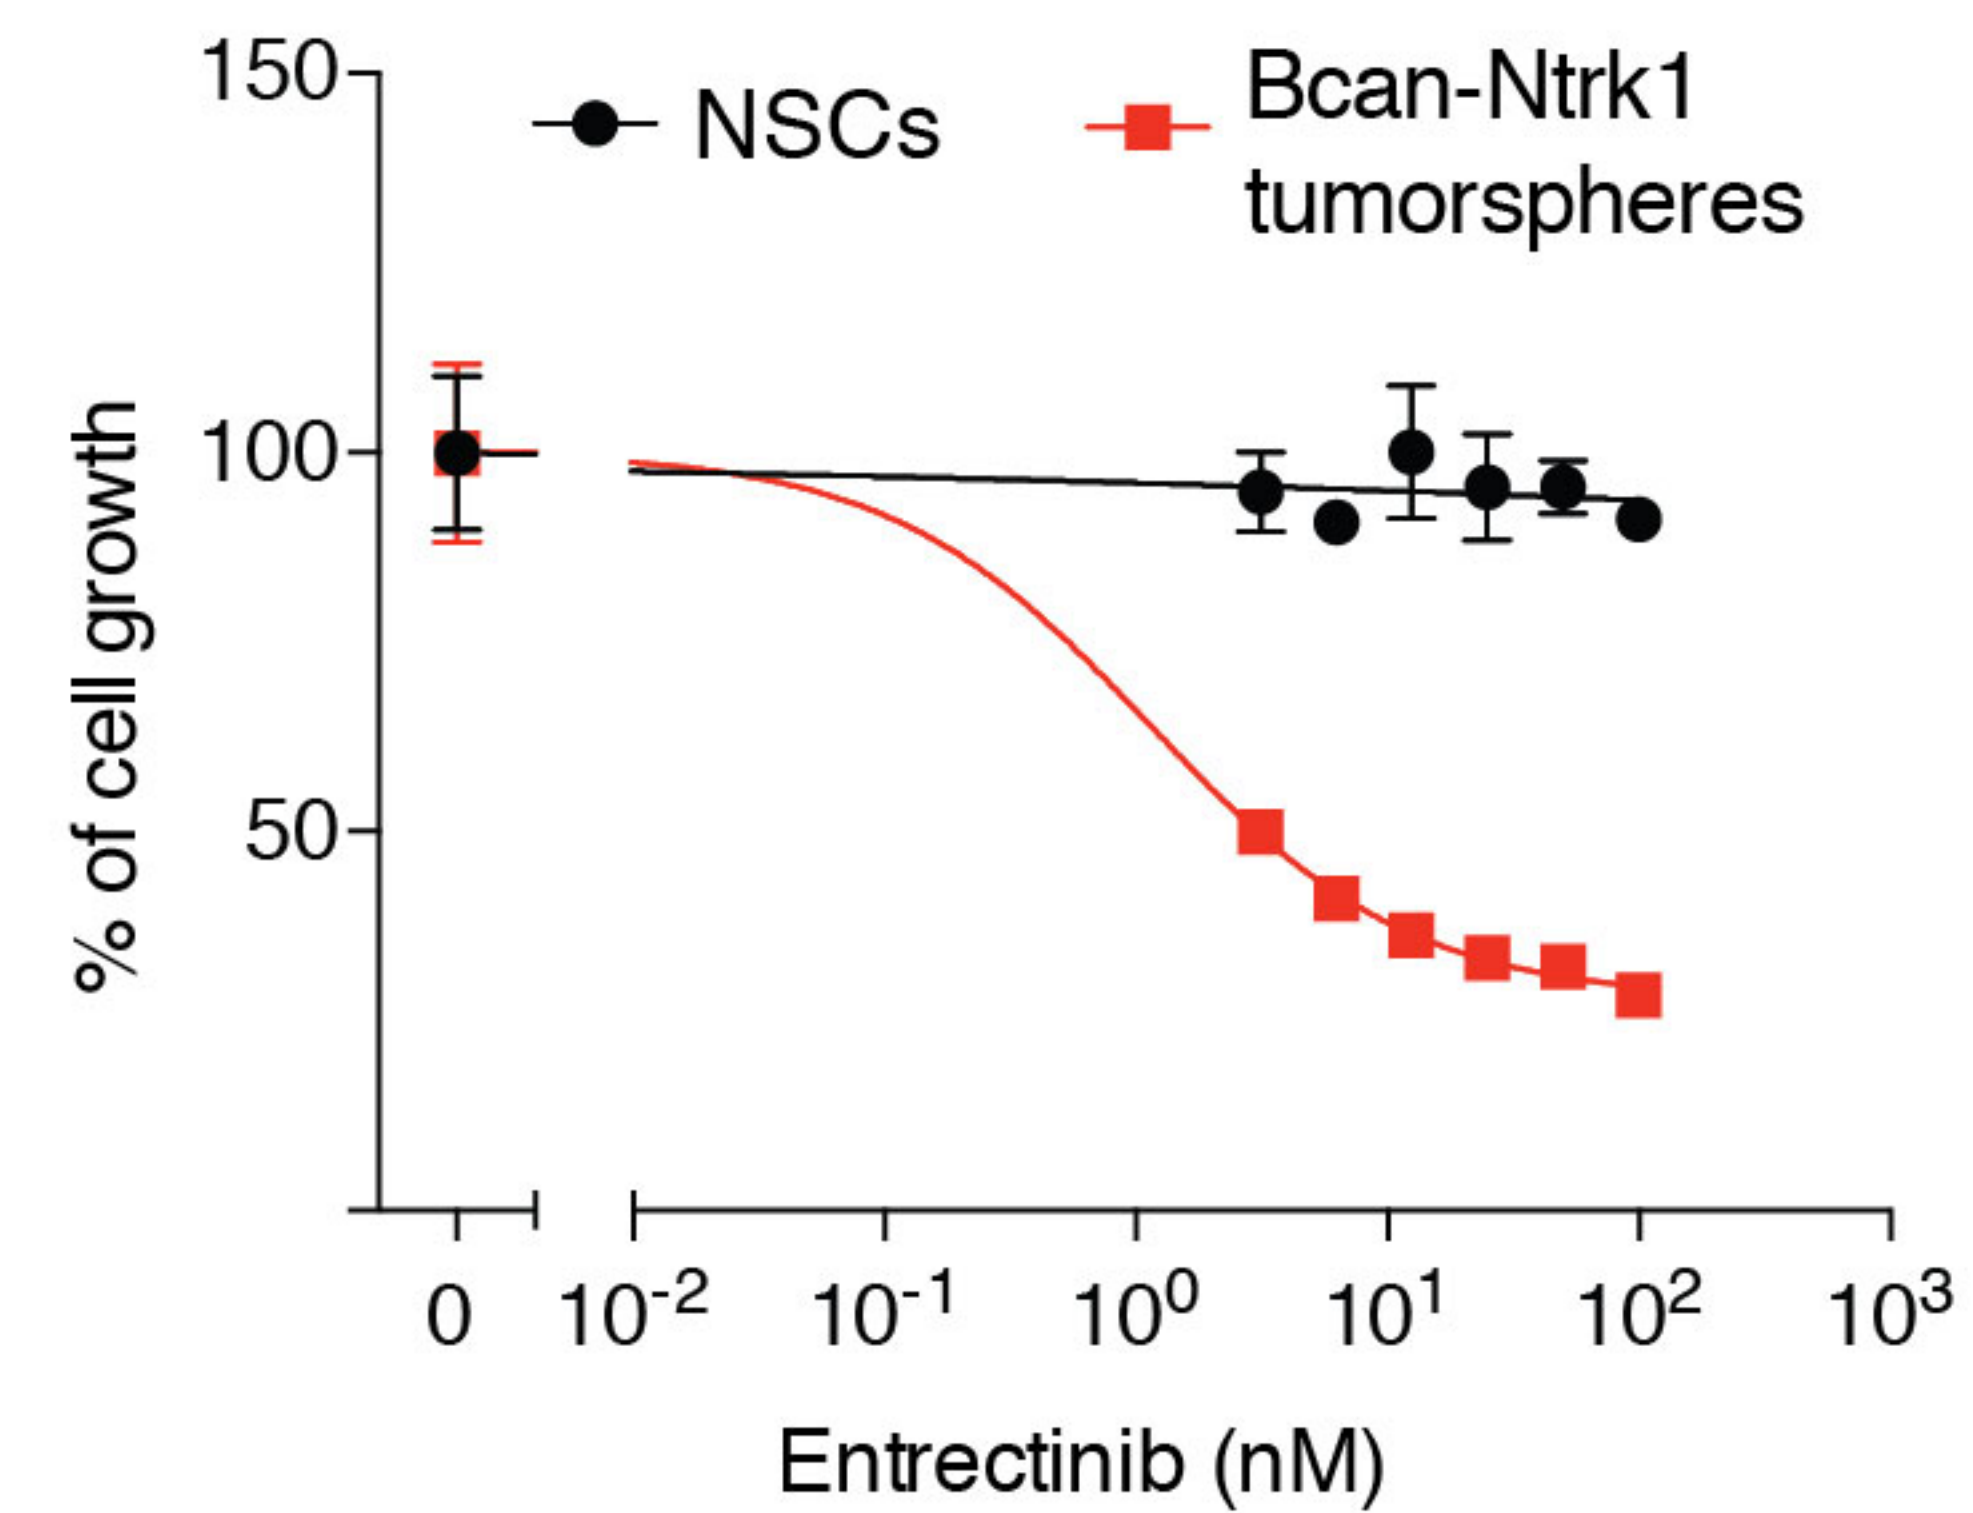

g

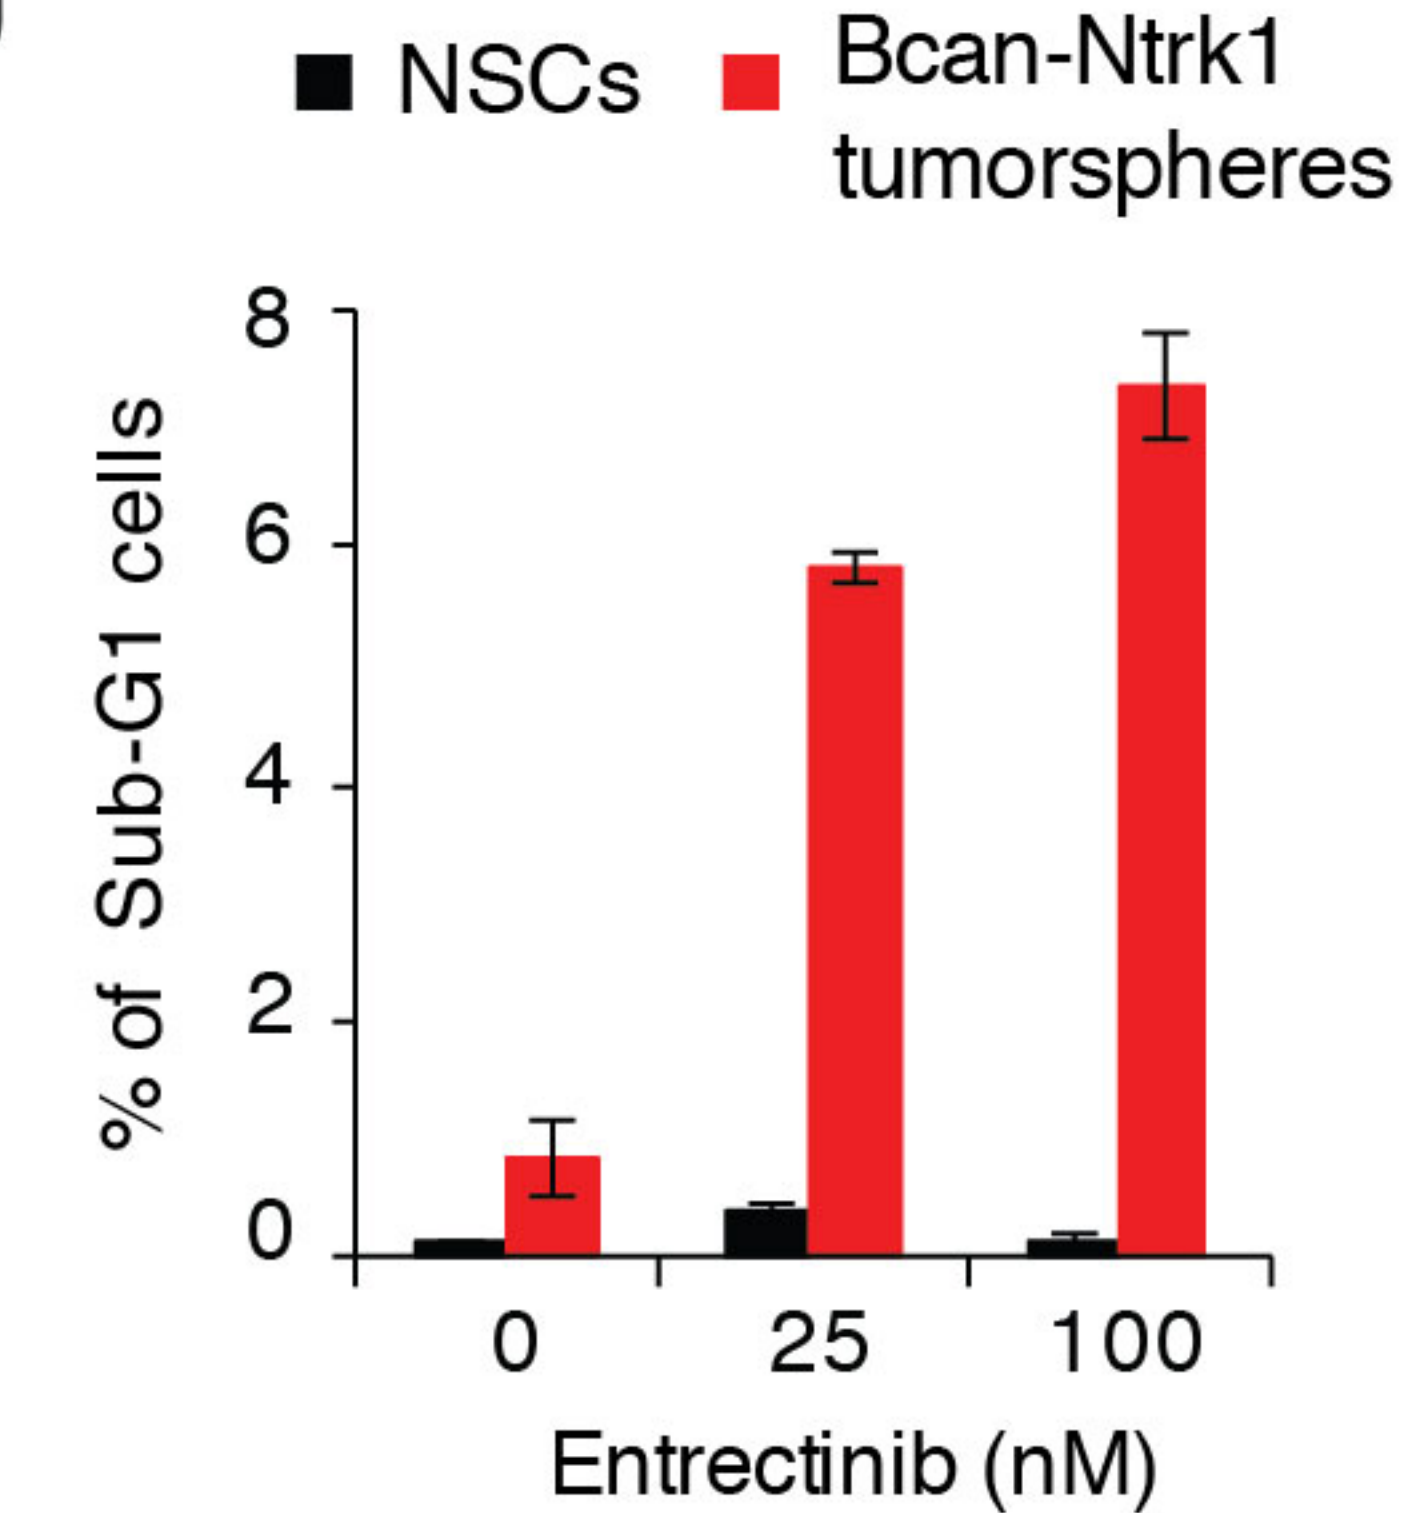

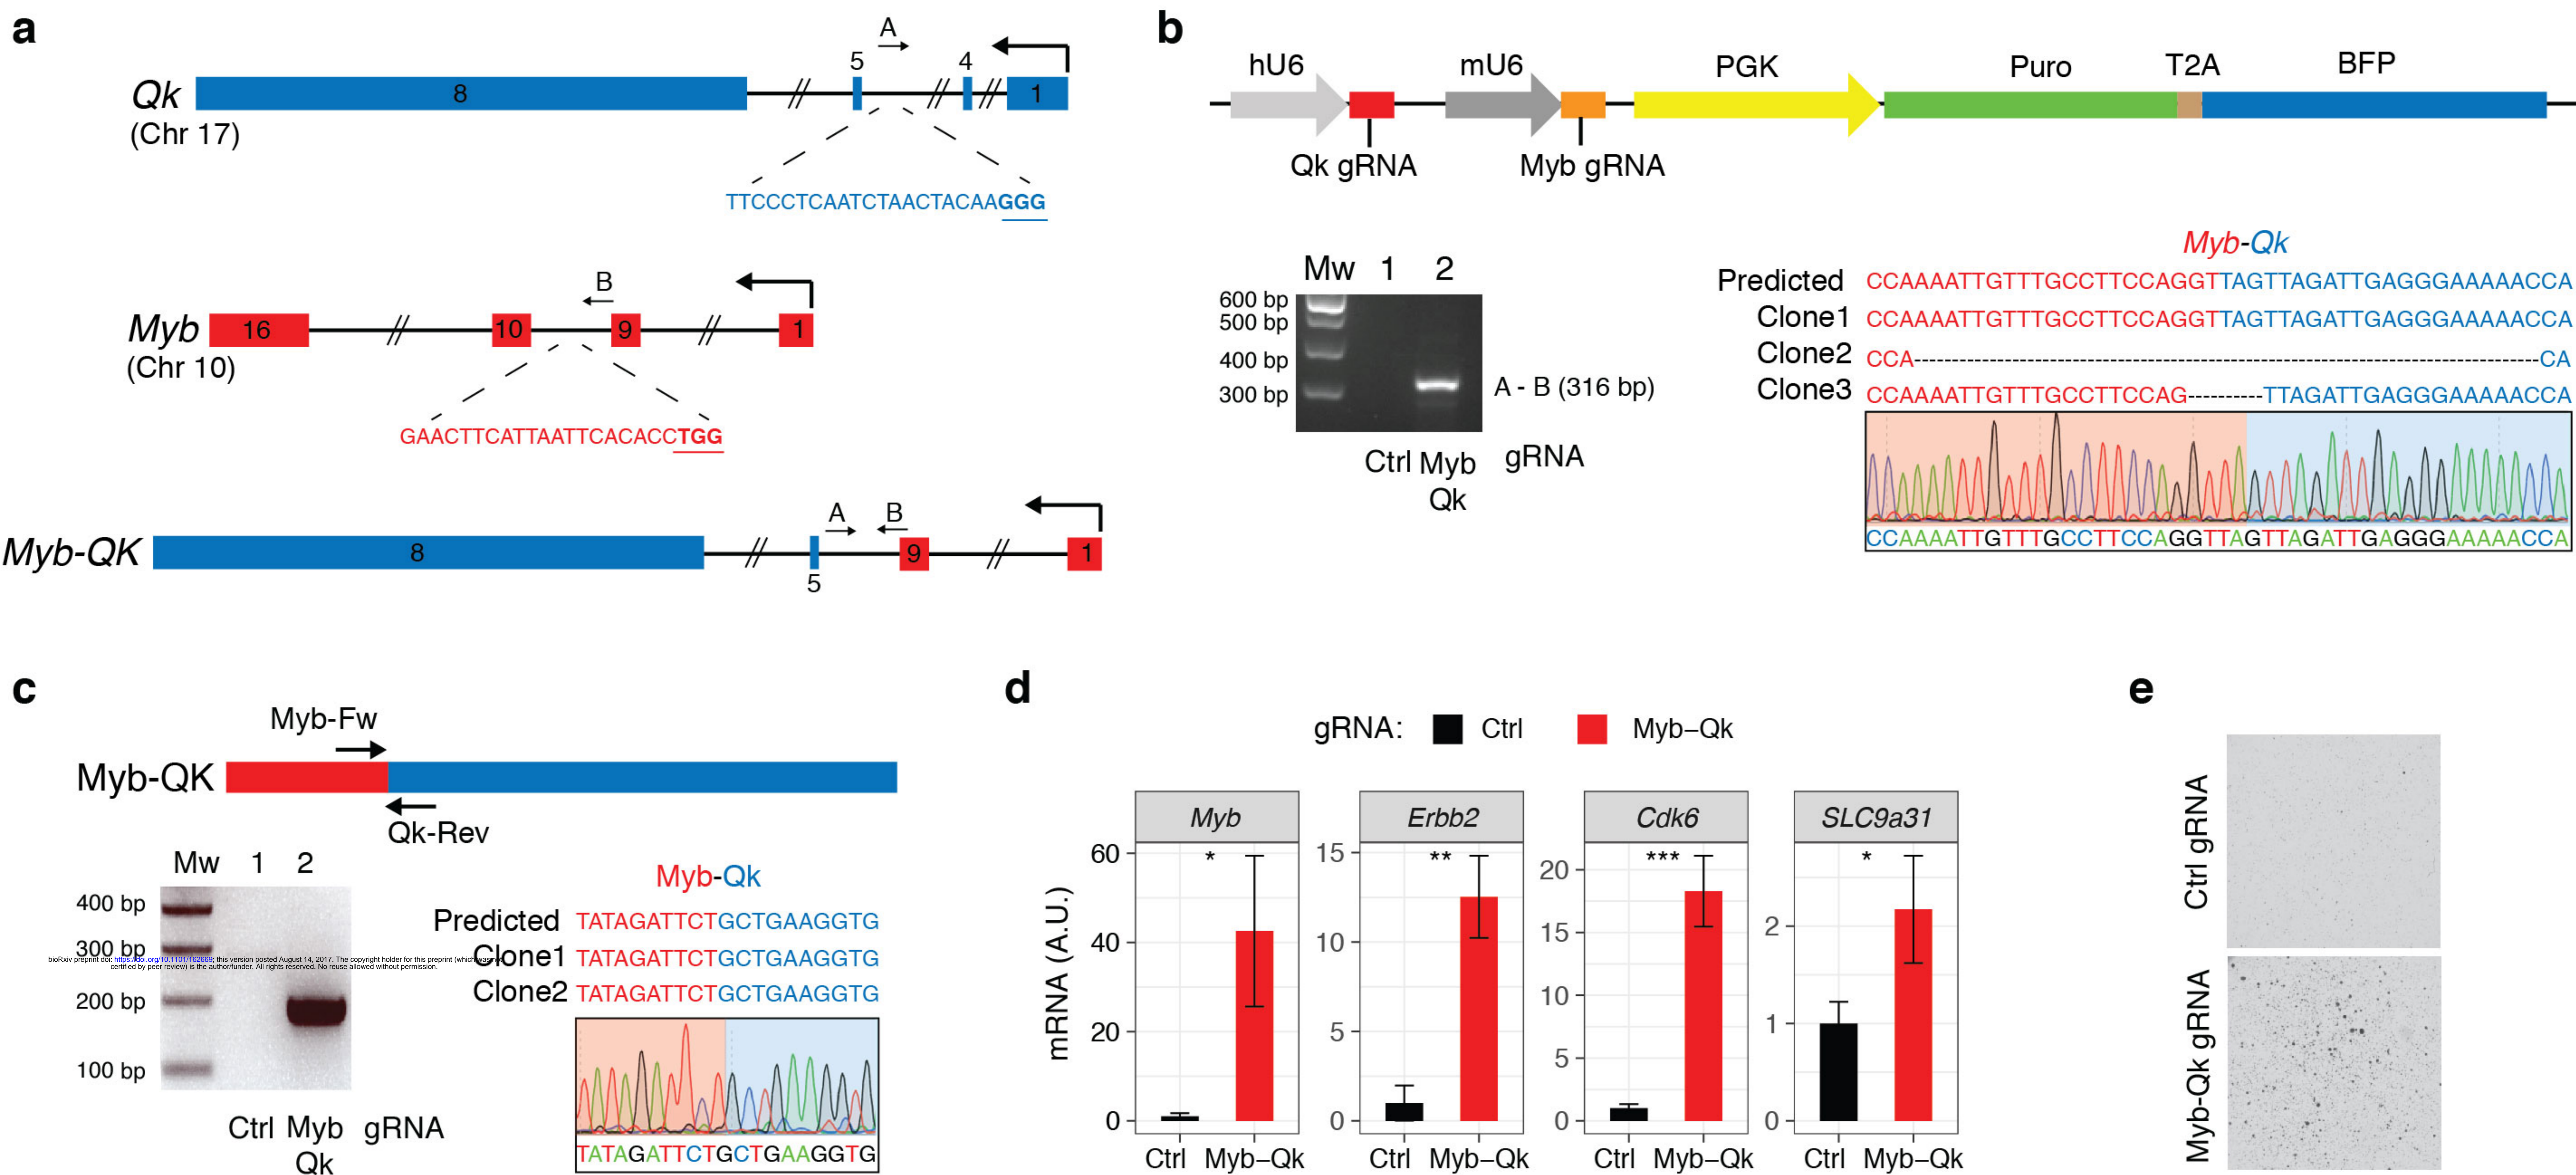

**a**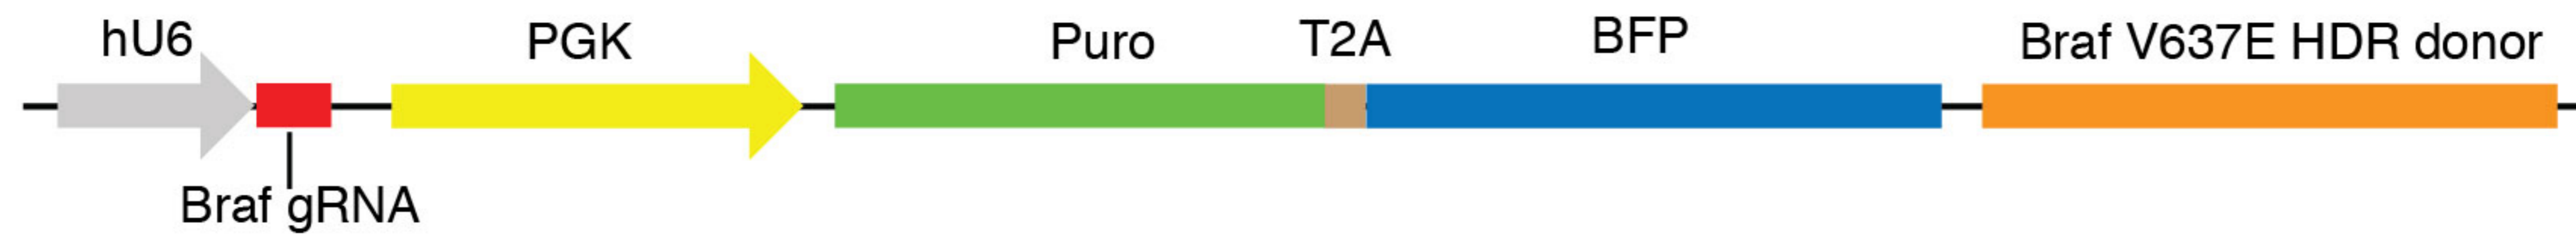**b**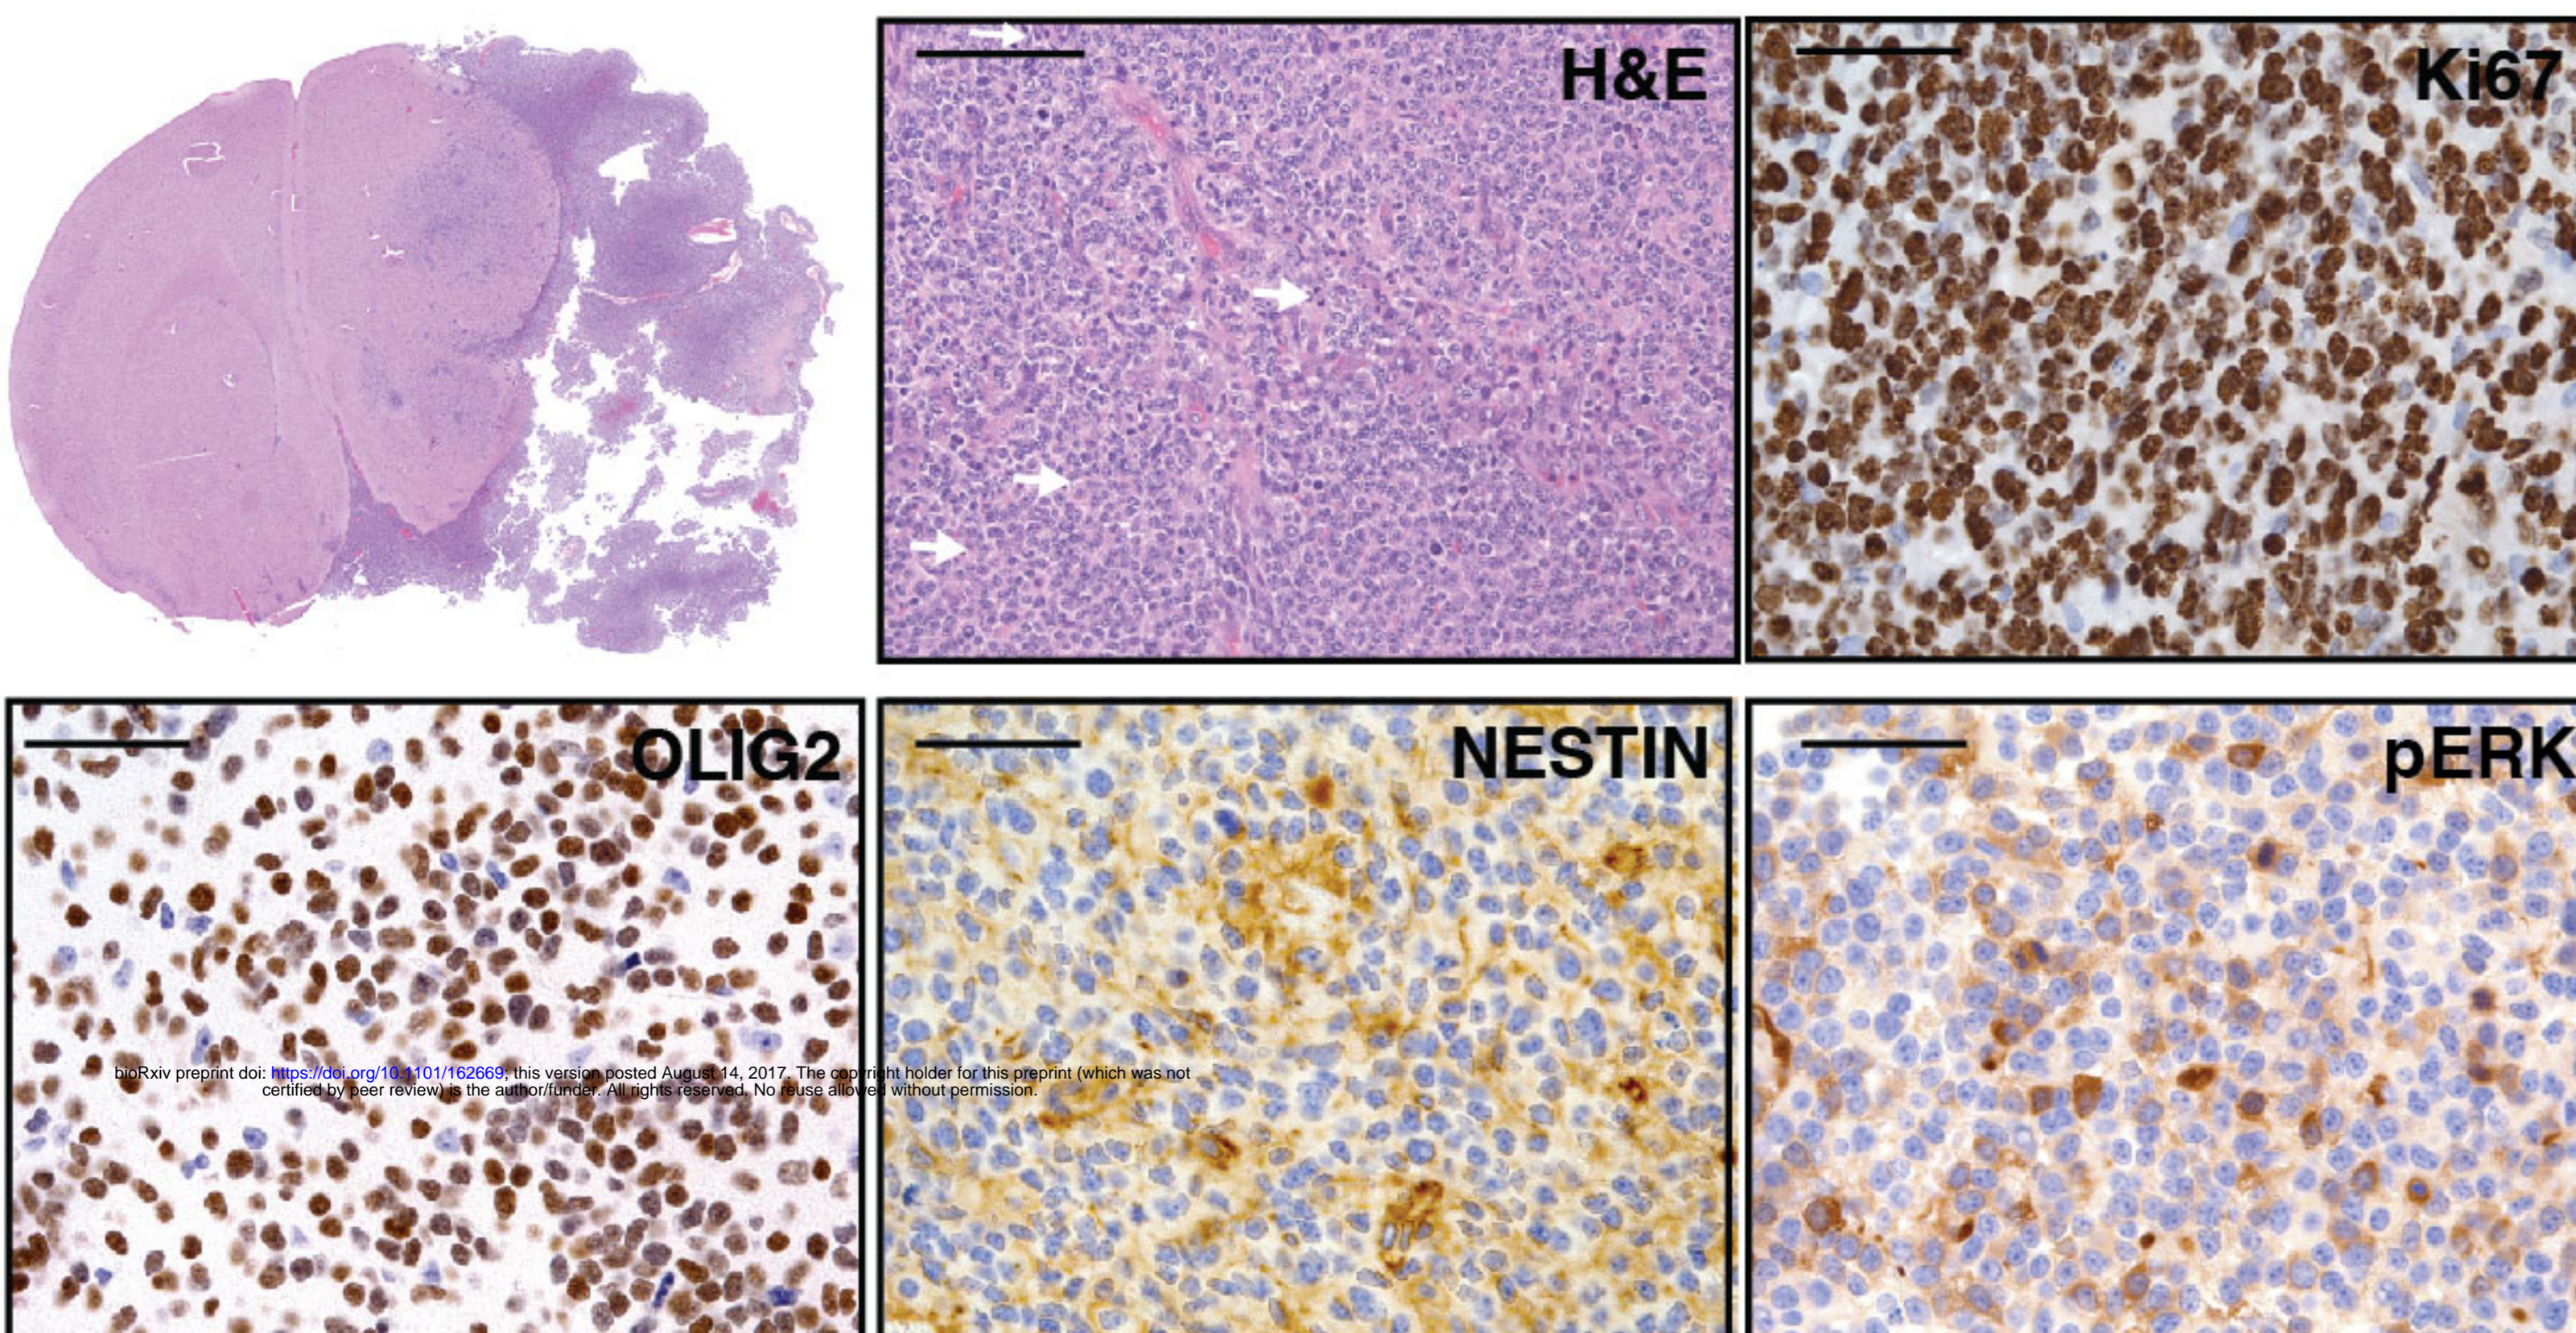**c**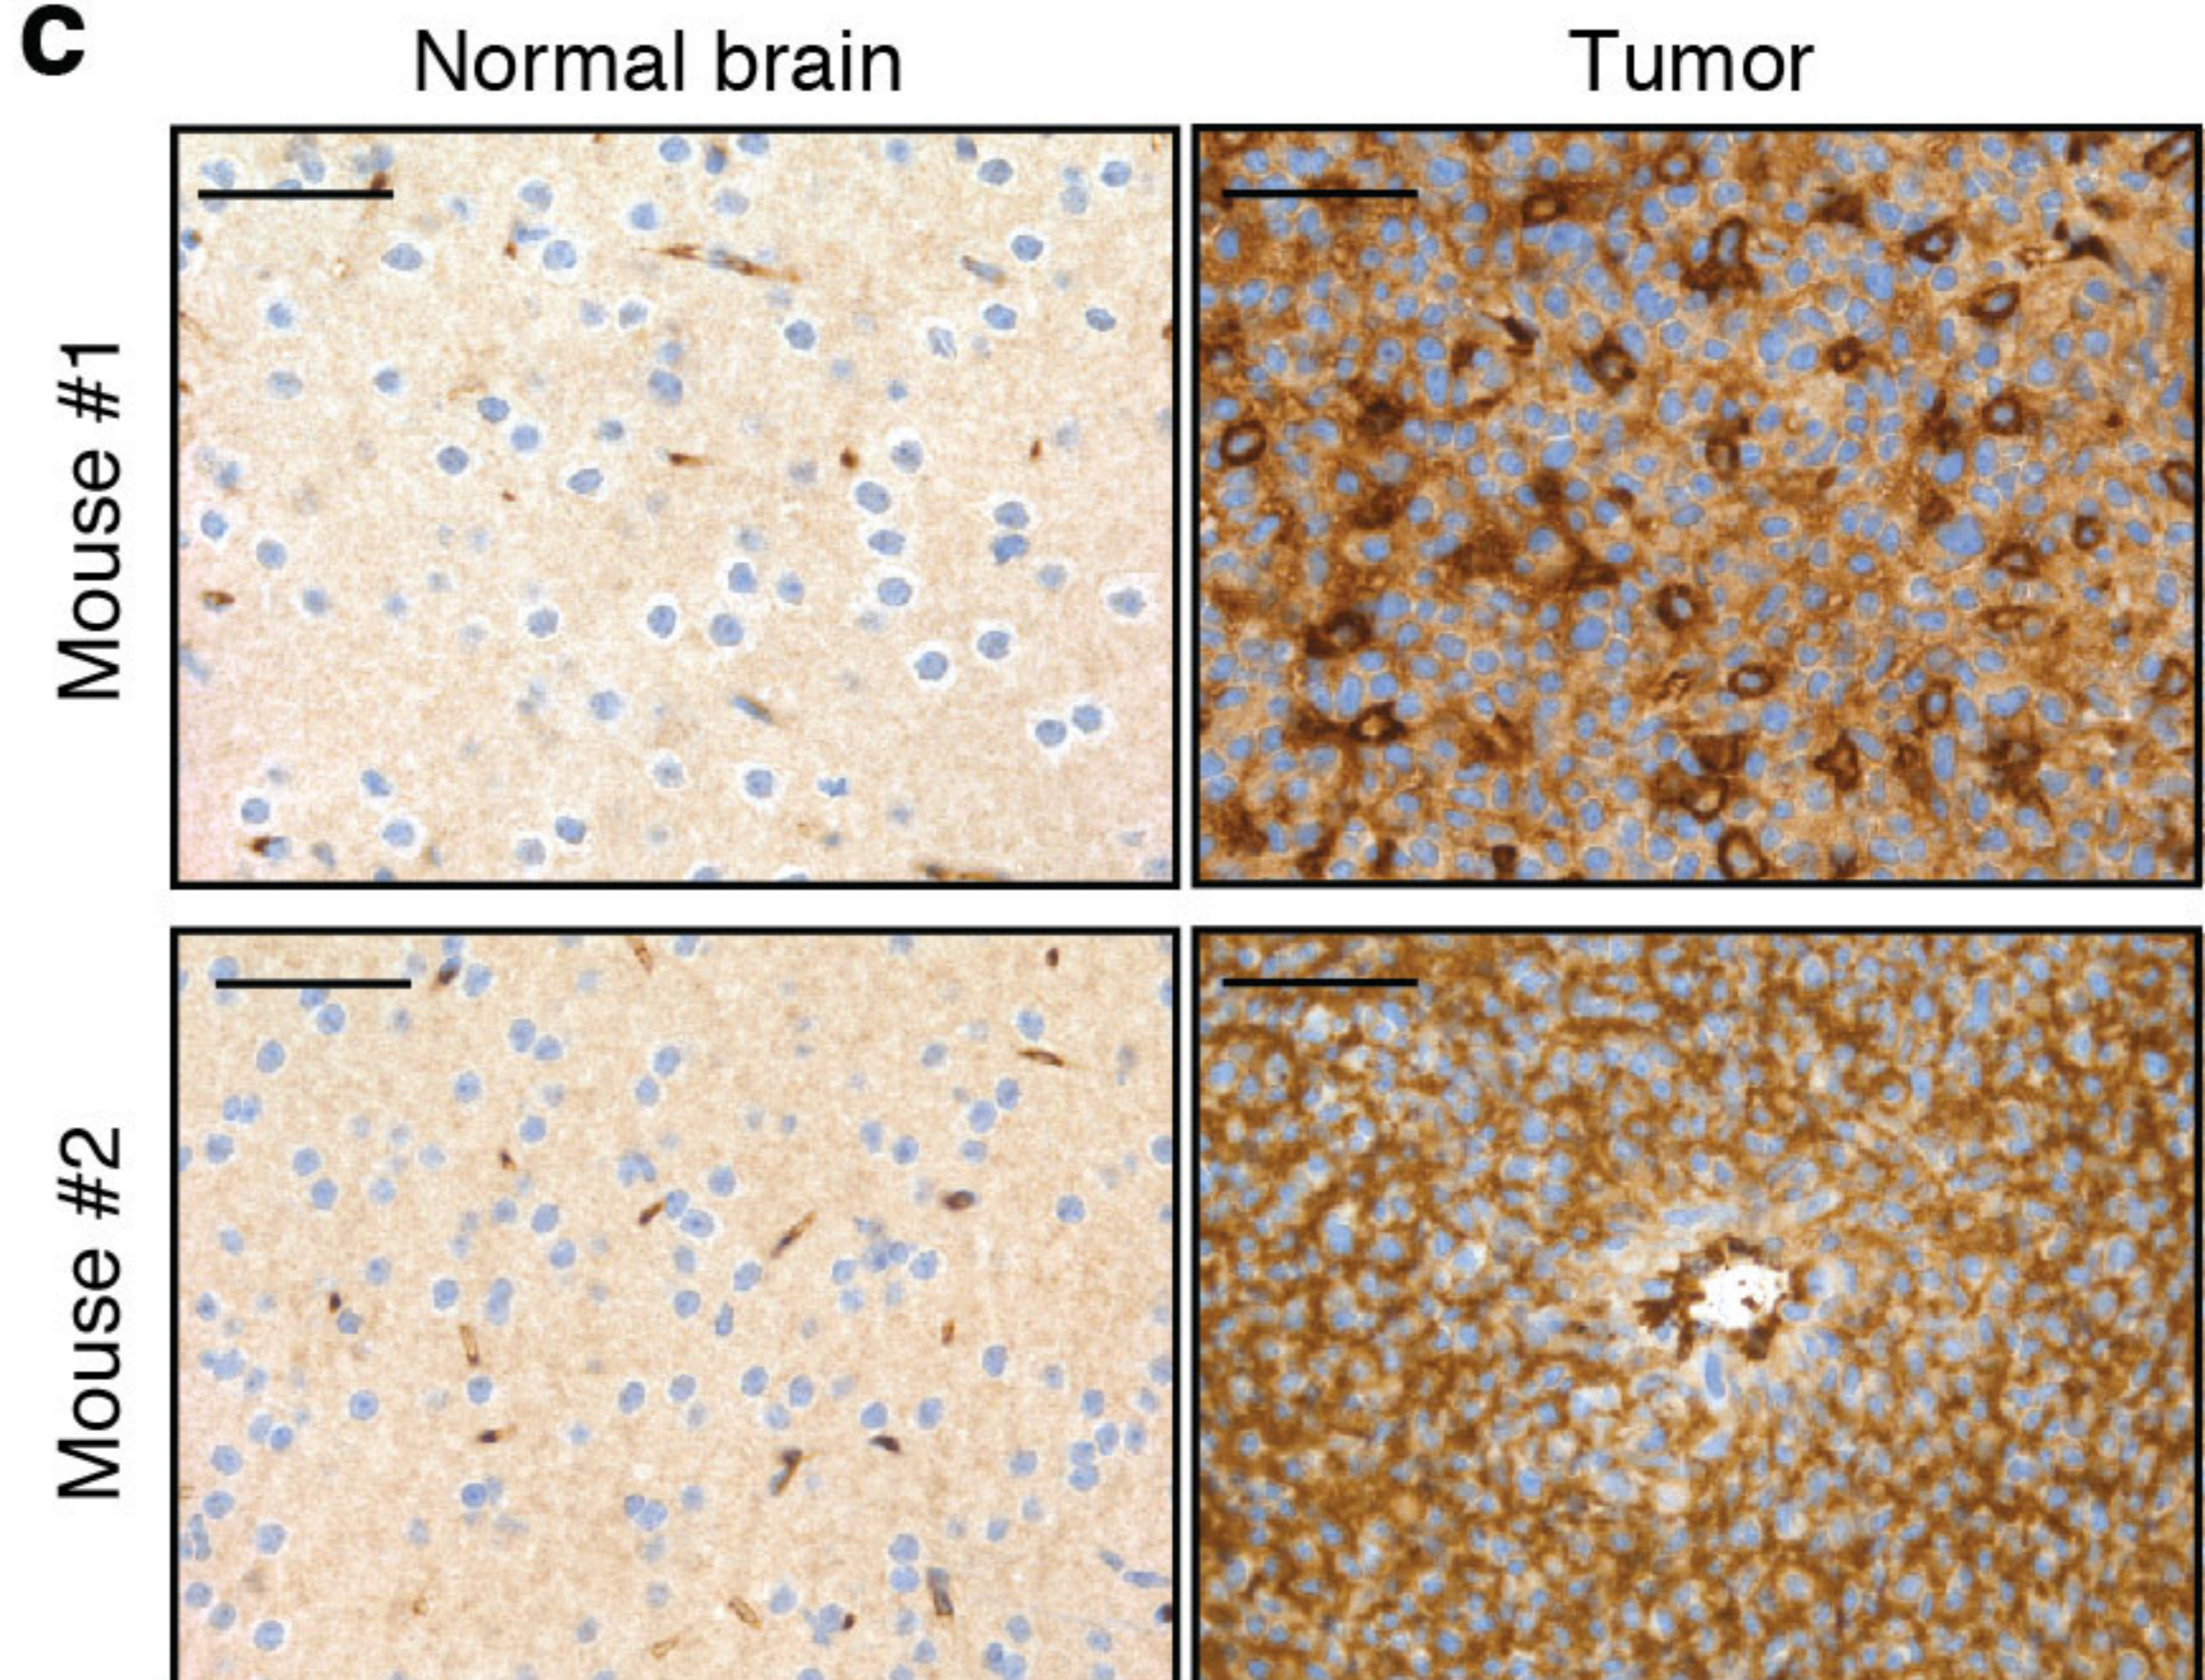**d**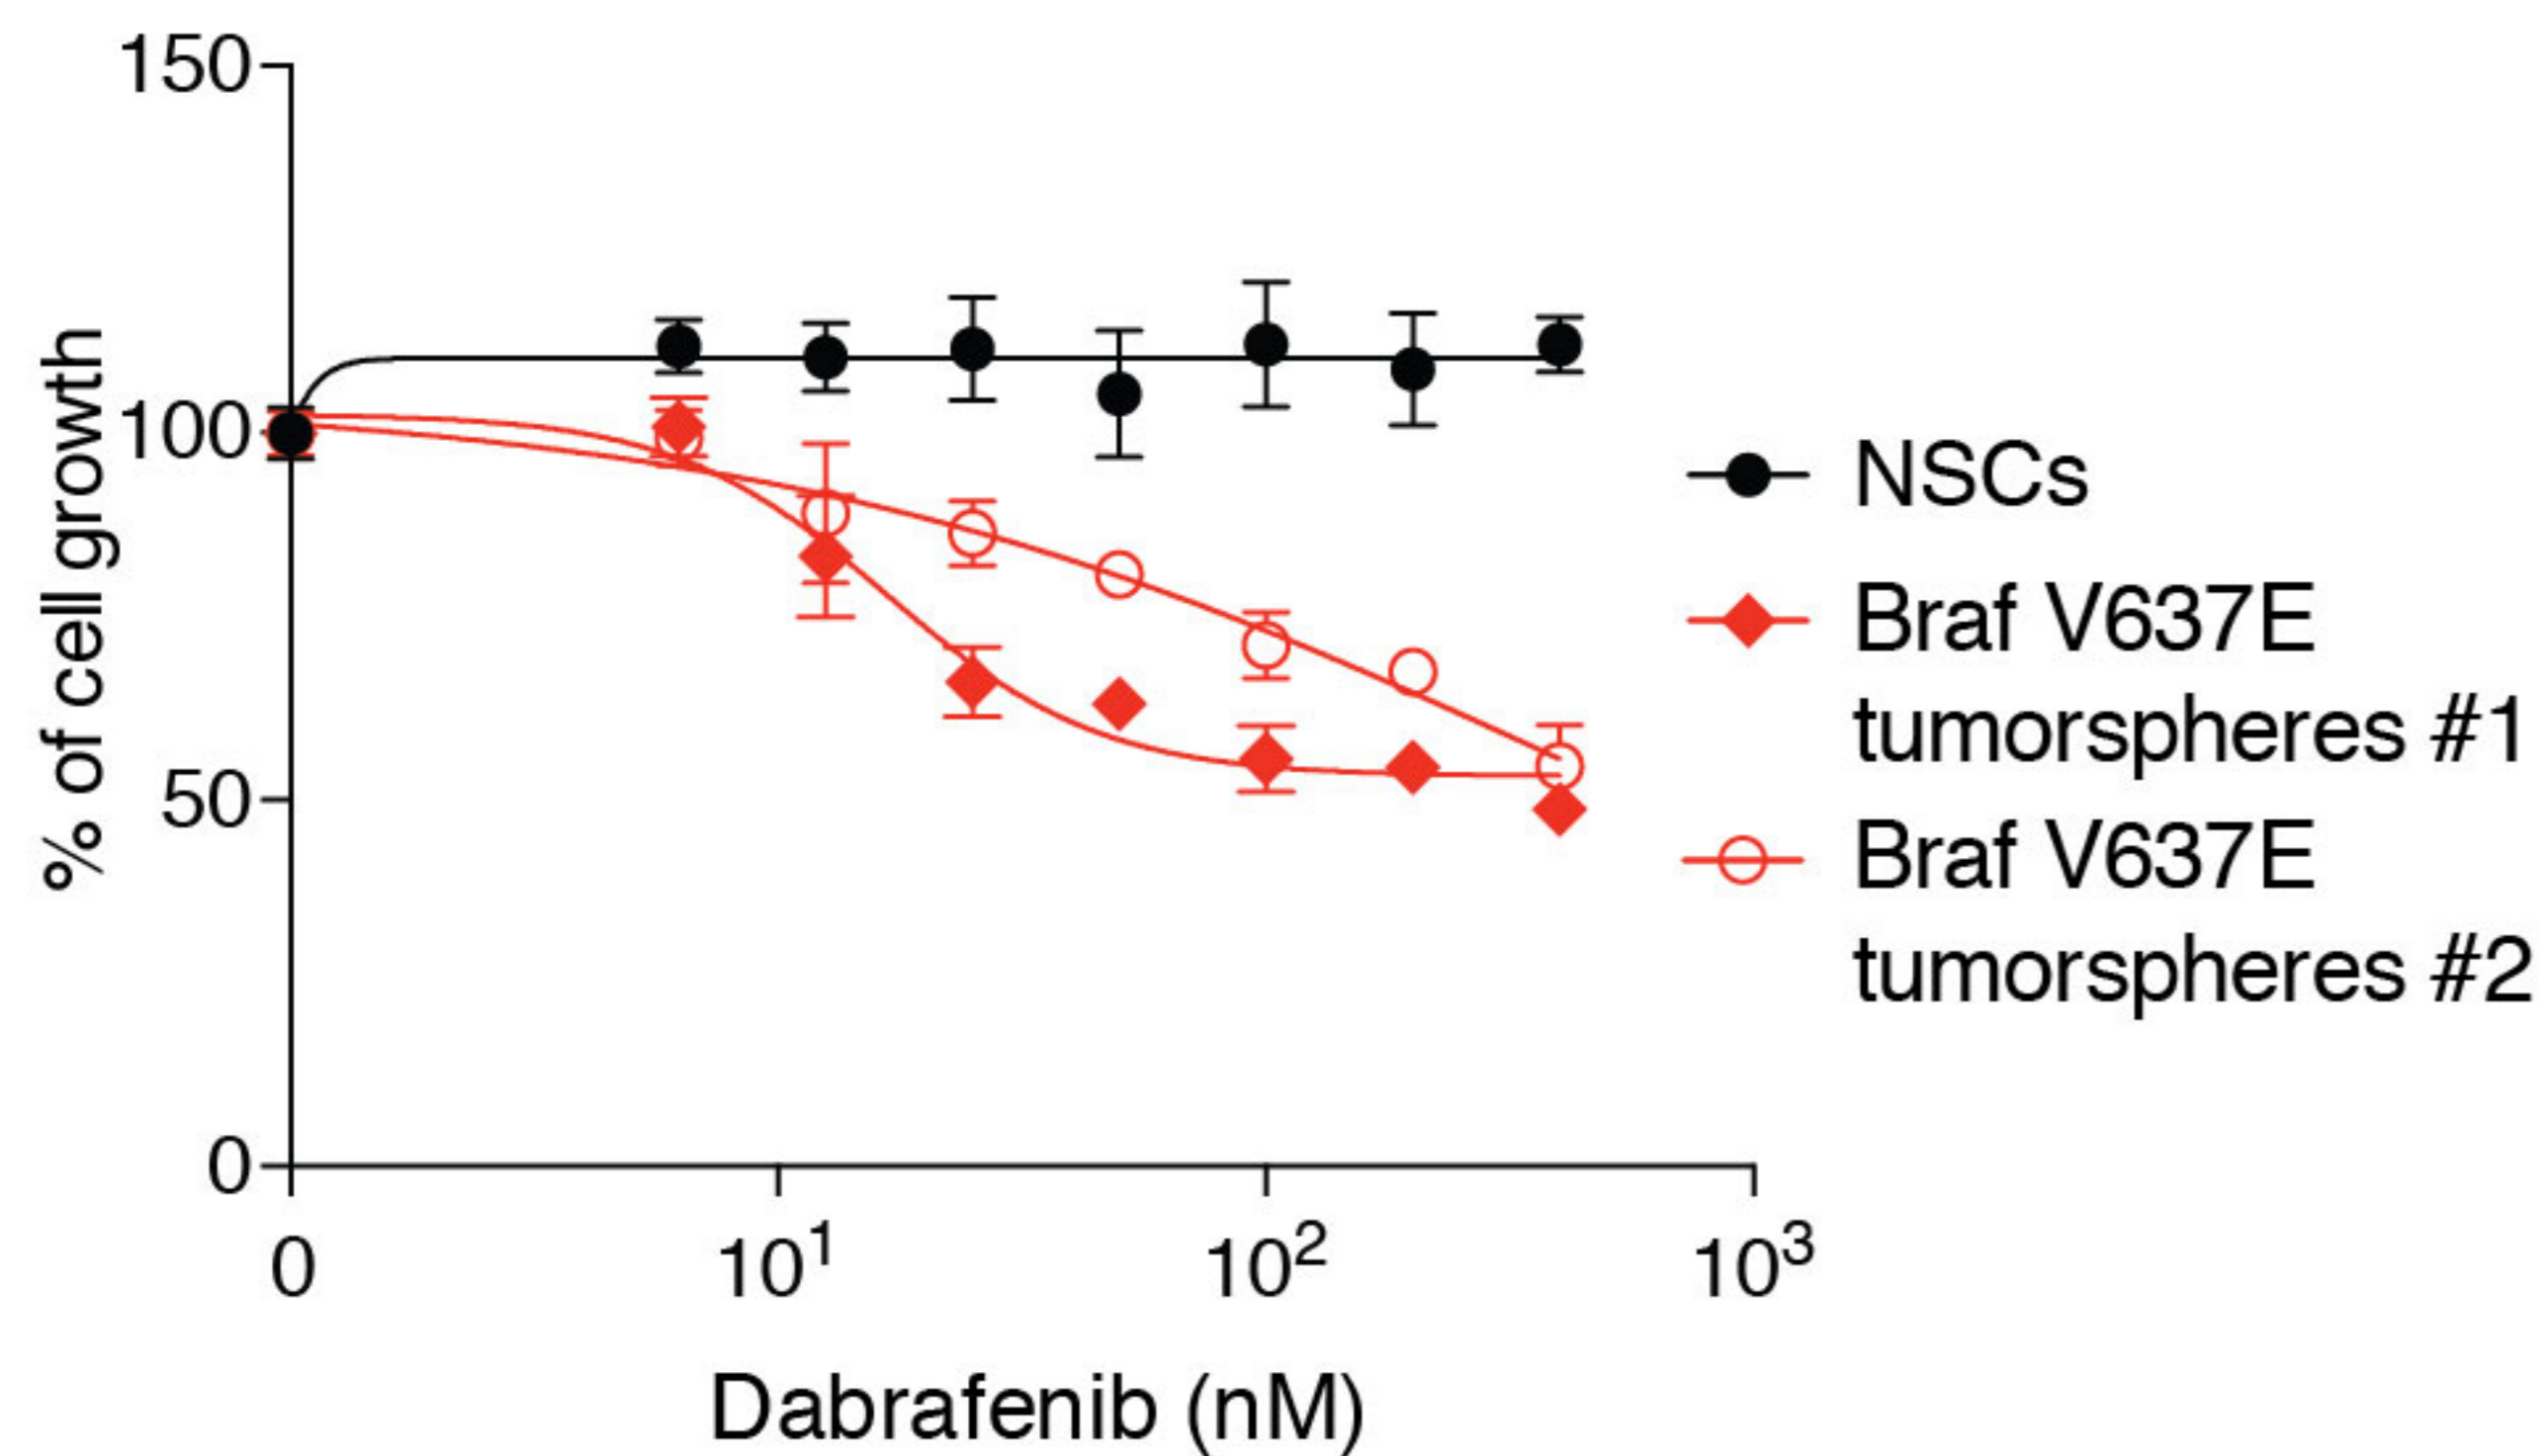**e**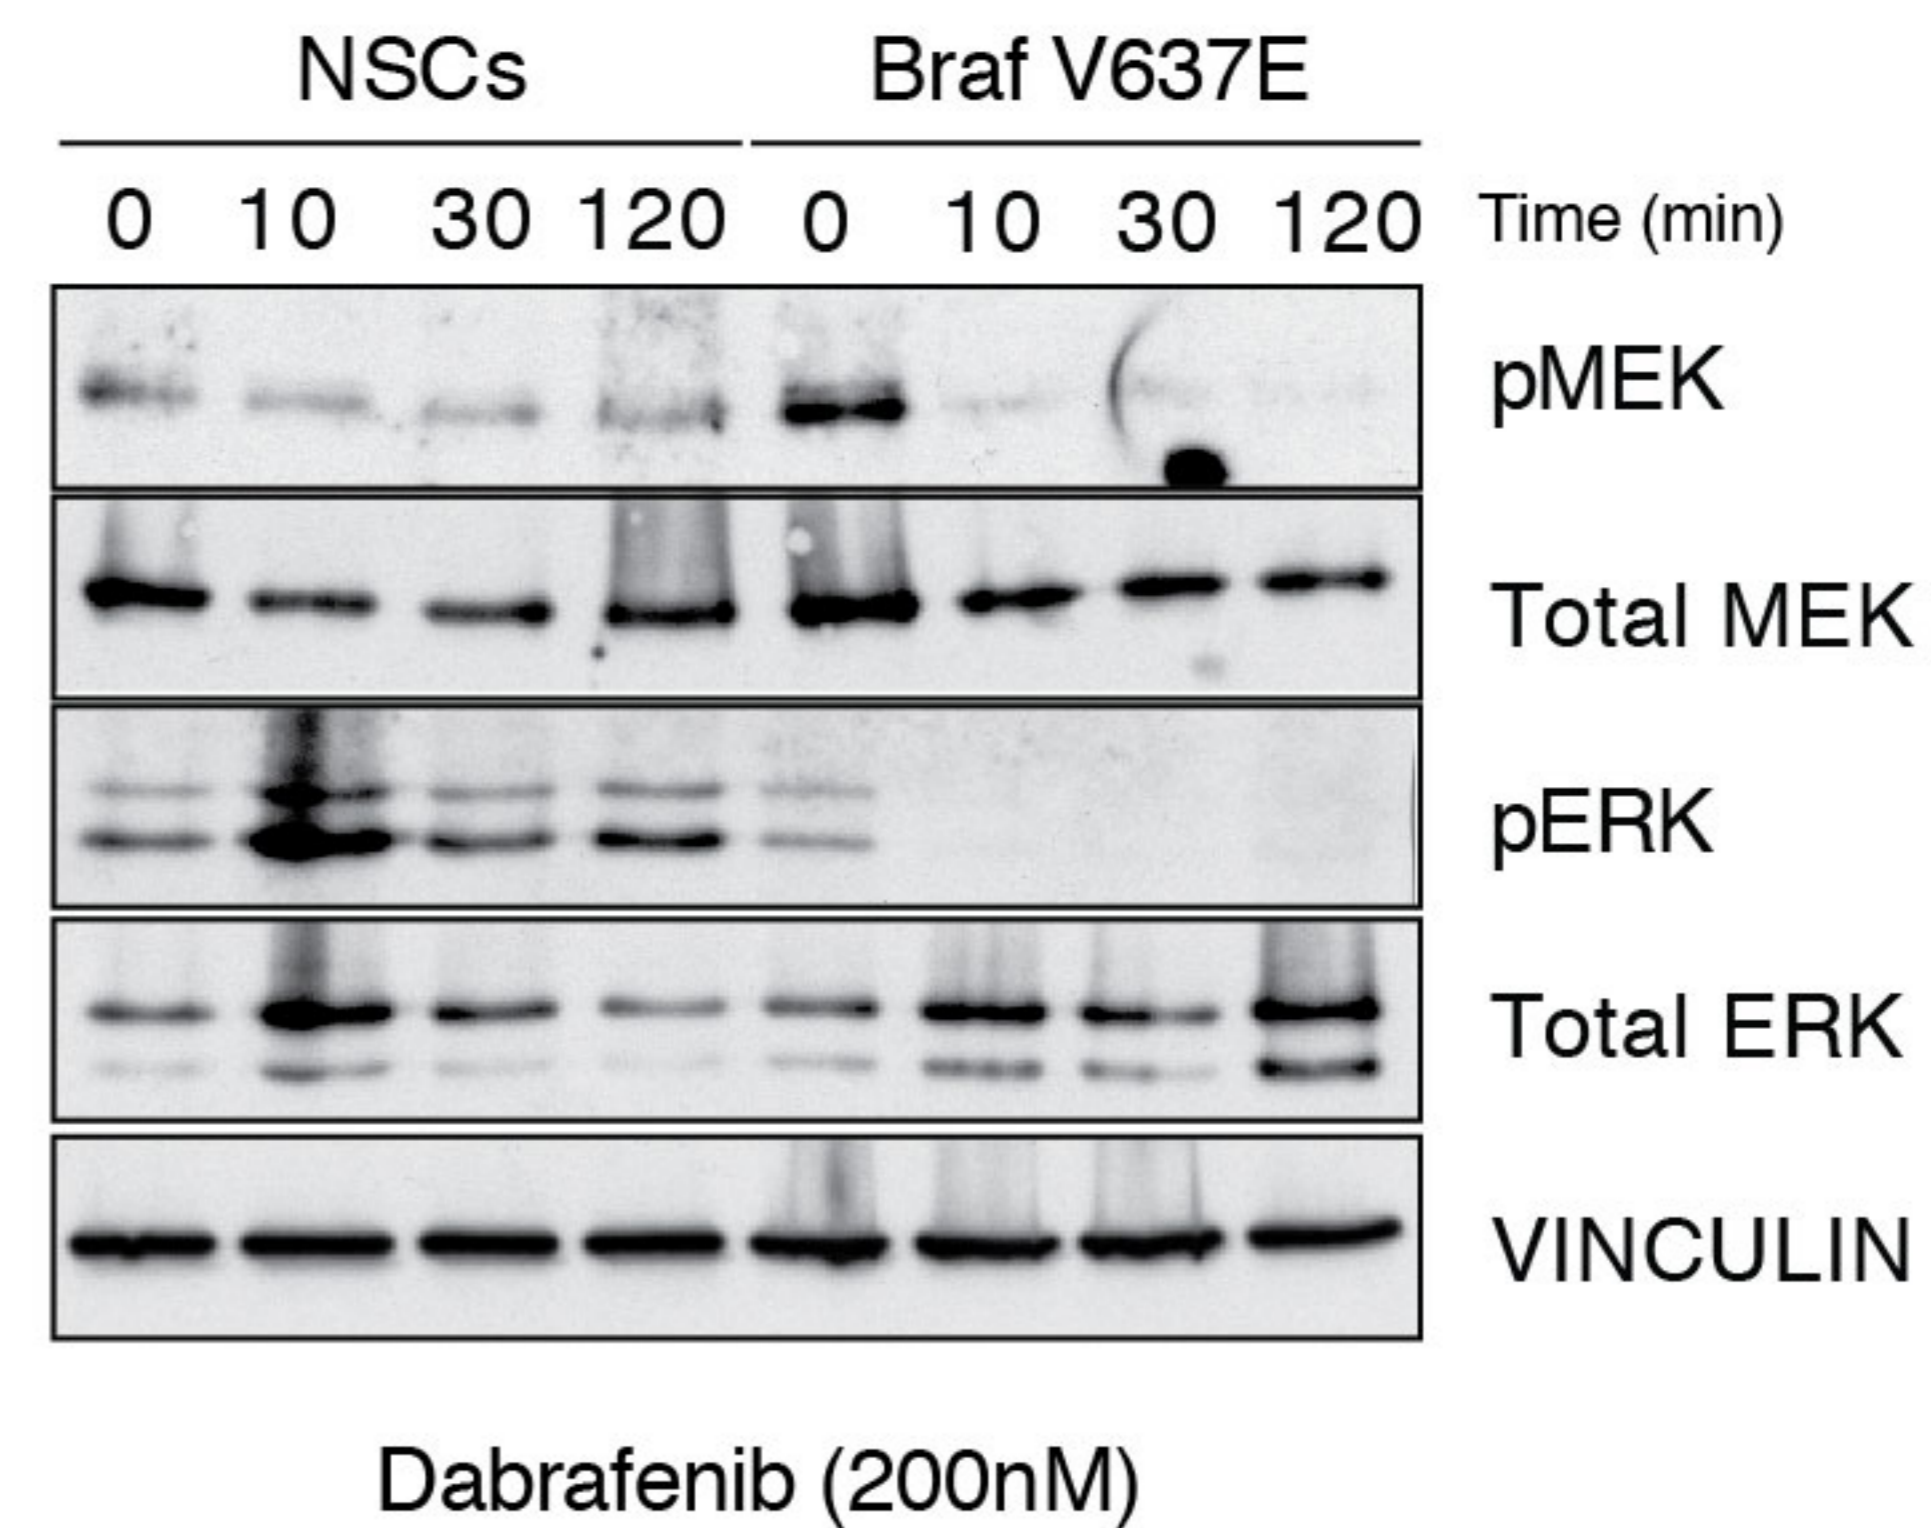

Source: https://www.biorxiv.org/content/10.1101/162669v1.full.pdf
